# Supplementary material
Source: PubMed Central journal article supplement (PMC6208446)

Supporting Information

**Carvone-Derived P-Stereogenic Phosphines: Design, Synthesis, and Use in Allene–Imine [3 + 2] Annulation**

Andrew J. Smaligo, Sriramurthy Vardhineedi, and Ohyun Kwon\*

Department of Chemistry and Biochemistry, University of California, Los Angeles, California 90095-1569

\*ohyun@chem.ucla.edu

**Table of Contents**

|                                                                                                                                          |     |
|------------------------------------------------------------------------------------------------------------------------------------------|-----|
| 1. General Information.....                                                                                                              | S2  |
| 2. Catalyst Preparation.....                                                                                                             | S3  |
| 2.1. Preparation of the Mesylates <b>2</b> and <b>2'</b> .....                                                                           | S3  |
| 2.2. Dialkylation of the Mesylates to Prepare the Phosphine Oxides <b>3a</b> , <b>3e</b> , <b>3e'</b> , <b>3f</b> , and <b>3f'</b> ..... | S4  |
| 2.3. Preparation of the Phosphine Oxides <b>3b</b> , <b>3c</b> , and <b>3d</b> .....                                                     | S6  |
| 2.4. General Procedure for Reduction of the Phosphine Oxides.....                                                                        | S8  |
| 3. Allenoate–Imine [3 + 2] Annulation.....                                                                                               | S11 |
| 3.1. General Procedure for Allenoate–Imine [3 + 2] Annulations.....                                                                      | S11 |
| 3.2. Proposed Transition States.....                                                                                                     | S12 |
| 3.3. Analytical Data for the Pyrroline Products.....                                                                                     | S12 |
| 4. Separation of Enantiomers.....                                                                                                        | S19 |
| 4.1. HPLC Conditions.....                                                                                                                | S19 |
| 4.2. Copies of HPLC Traces.....                                                                                                          | S20 |
| 5. References.....                                                                                                                       | S57 |
| 6. Copies of <sup>1</sup> H, <sup>13</sup> C, and <sup>31</sup> P NMR Spectra.....                                                       | S58 |
| 7. ORTEP Representations of the Phosphine Oxides <b>3b</b> and <b>3c</b> .....                                                           | S94 |

## 1. General Information

Unless otherwise stated, reactions were performed in flame-dried glassware fitted with rubber septa under an argon atmosphere and were stirred with Teflon-coated magnetic stirring bars. Liquid reagents and solvents were transferred via syringe using standard Schlenk techniques. Benzene and dichloromethane were freshly distilled over calcium hydride. Tetrahydrofuran (THF) was distilled over sodium/benzophenone ketyl. All other solvents and reagents were used as received unless otherwise noted. Reaction temperatures above 23 °C refer to oil bath temperatures. Thin layer chromatography was performed using Silicycle silica gel 60 F-254 precoated plates (0.25 mm) and visualized by UV irradiation and cerium ammonium molybdate stain. SiliCycle Silica-P silica gel (particle size 40-63  $\mu\text{m}$ ) was used for flash column chromatography.  $^1\text{H}$  and  $^{13}\text{C}$  NMR spectra were recorded on Bruker AV-500, DRX-500 and AV-400 MHz spectrometers with  $^{13}\text{C}$  operating frequencies of 125, 125 and 100 MHz, respectively. Chemical shifts ( $\delta$ ) are reported in ppm relative to the residual solvent  $\text{CD}(\text{H})\text{Cl}_3$  signal ( $\delta = 7.26$  for  $^1\text{H}$  NMR and  $\delta = 77.0$  for  $^{13}\text{C}$  NMR). Data for  $^1\text{H}$  NMR spectra are reported as follows: chemical shift, multiplicity, coupling constants (Hz), and number of hydrogens. Data for  $^{13}\text{C}$  NMR spectra are reported in terms of chemical shift. The following abbreviations were used to explain the multiplicities: s = singlet, d = doublet, t = triplet, q = quartet, quint = quintet, m = multiplet. HRMS (ESI) was recorded on an IonSpec Ultima 7T FTICR using samples in  $\text{CH}_3\text{CN}$ . MALDI mass data was obtained on an AB/PerSpective DE-STR TOF instrument using samples in  $\text{CH}_3\text{CN}$  with 2,5-dihydroxybenzoic acid as a matrix. X-ray crystallographic data were collected using a Bruker SMART CCD based diffractometer equipped with a low-temperature apparatus operating at 100K. Melting points (mp) are uncorrected and were collected on an Electrothermal® capillary melting point apparatus. Optical rotations were determined using an Autopol IV polarimeter and a 50-mm cell at concentrations close to 1 g/100 mL. All values of ee were determined through chiral HPLC using a Shimadzu CBM Lite system.

**Abbreviations.** Ms = methanesulfonyl, Ts = *p*-toluenesulfonyl, Ns = *p*-nitrobenzenesulfonyl, Bs = benzenesulfonyl, PMP = *p*-methoxyphenyl, Ar = aryl, THF = tetrahydrofuran, EtOAc = ethyl acetate, MeOH = methanol,  $\text{Et}_3\text{N}$  = triethylamine, HOAc = acetic acid, PhOH = phenol.

## 2. Catalyst Preparation

The diol **1** was prepared on 100-g scale following a literature procedure.<sup>1</sup> Only one purification was required: distillation of the ester precursor to the diol **1**.

### 2.1. Preparation of the Mesylates **2** and **2'**

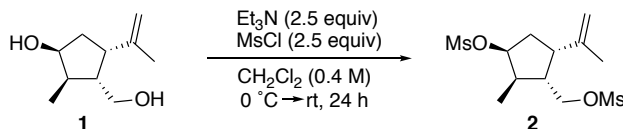

A solution of methanesulfonyl chloride (97.0 mL, 1250 mmol) was added dropwise to a stirred solution of the diol **1** (85 g, 500 mmol) and  $\text{Et}_3\text{N}$  (174 mL, 1250 mmol) in  $\text{CH}_2\text{Cl}_2$  (0.4 M) at  $0\text{ }^\circ\text{C}$ . After stirring at  $0\text{ }^\circ\text{C}$  for 30 min, the mixture was warmed to room temperature and stirred for an additional 24 h. Upon completion (TLC), the reaction was quenched through the addition of saturated aqueous  $\text{NaHCO}_3$  (400 mL). The aqueous phase was extracted with  $\text{CH}_2\text{Cl}_2$  ( $3 \times 400\text{ mL}$ ); the combined organic phases were washed with brine, dried (anhydrous  $\text{Na}_2\text{SO}_4$ ), and concentrated (rotary evaporation) to provide the dimesylate **2** as a viscous liquid (160 g, 98% yield). IR (film)  $\nu_{\text{max}}$  3355, 2930, 2360, 1646  $\text{cm}^{-1}$ ;  $^1\text{H}$  NMR (500 MHz,  $\text{CDCl}_3$ )  $\delta$  5.07 (t,  $J = 3.6\text{ Hz}$ , 1H), 4.93 (s, 1H), 4.73 (s, 1H), 4.10 (dd,  $J = 10.0, 5.2\text{ Hz}$ , 1H), 3.94 (dd,  $J = 10.0, 7.2\text{ Hz}$ , 1H), 3.10–3.03 (m, 1H), 3.01 (s, 3H), 2.97 (s, 3H), 2.25–2.12 (m, 3H), 2.06–1.79 (m, 1H), 1.79 (s, 3H), 1.17 (d,  $J = 6.8\text{ Hz}$ , 3H);  $^{13}\text{C}$  NMR (125 MHz,  $\text{CDCl}_3$ )  $\delta$  142.5, 112.2, 85.6, 70.4, 44.3, 44.2, 42.1, 38.2, 37.1, 23.4, 14.7; LRMS (MALDI) calcd for  $\text{C}_{12}\text{H}_{22}\text{O}_6\text{S}_2$   $m/z$  326.09, found 326.1.

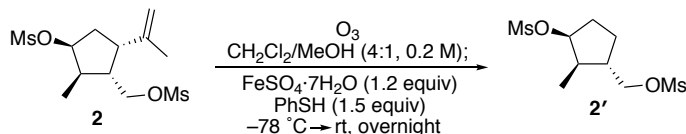

A stirred solution of the dimesylate **2** (16.3 g, 50.0 mmol) in  $\text{CH}_2\text{Cl}_2/\text{MeOH}$  (4:1, 0.2 M) was cooled to  $-78\text{ }^\circ\text{C}$  in an acetone/dry ice bath. Ozone was bubbled through the cooled solution until a blue color was observed. The solution was purged with argon for 30 min and then thiophenol (7.65 mL, 75.0 mmol) and iron(II) sulfate heptahydrate (16.7 g, 60.0 mmol) were added sequentially. The cooling bath was removed and the mixture was warmed to room temperature and stirred overnight. Water (100 mL) was added and then the aqueous phase was extracted with  $\text{CH}_2\text{Cl}_2$  ( $3 \times 100\text{ mL}$ ). The combined organic phases were washed with saturated aqueous  $\text{NaHCO}_3$  and brine, dried (anhydrous  $\text{Na}_2\text{SO}_4$ ), and concentrated (rotary evaporation). The residue was purified through flash column chromatography ( $\text{SiO}_2$ ;  $\text{EtOAc}/\text{hexanes}$ , 1:2) to give the dimesylate **2'** as a white solid (11.4 g, 80% yield). When performed on 150-mmol scale, a similar procedure was followed, except for purification. The crude product was triturated in diethyl ether for 10 min and the filter cake collected and dried under vacuum to give the dimesylate **2'** as a white solid (*ca.* 65% yield, average from five runs). m.p.  $95\text{--}96\text{ }^\circ\text{C}$  (decomp); IR (film)  $\nu_{\text{max}}$  3027, 2940, 1332, 1171  $\text{cm}^{-1}$ ;  $^1\text{H}$  NMR (500 MHz,  $\text{CDCl}_3$ )  $\delta$  5.04 (s, 1H), 4.26 (dd,  $J = 4.2, 9.8\text{ Hz}$ , 1H), 4.19 (dd,  $J = 5.2, 9.7\text{ Hz}$ , 1H), 3.02 (s, 3H), 3.01 (s, 3H), 2.16–1.88 (m, 5H), 1.62–1.54 (m, 1H), 1.14 (d,  $J = 6.7\text{ Hz}$ , 3H);  $^{13}\text{C}$  NMR (125 MHz,  $\text{CDCl}_3$ )  $\delta$  87.8, 71.0, 42.9, 41.3, 38.3, 37.3, 31.8, 25.5, 12.8; HRMS (ESI-TOF) calcd for  $\text{HC}_9\text{H}_{18}\text{O}_6\text{S}_2$  287.0623, found 287.0625.

## 2.2. Dialkylation of the Mesylates to Prepare the Phosphine Oxides **3a**, **3e**, **3e'**, **3f**, and **3f'**

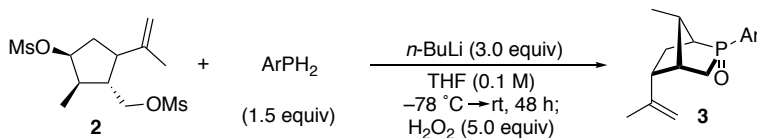

*n*-Butyllithium (2.1 M solution in hexanes, 3.0 equiv) was added via syringe over 30 min to a stirred solution of arylphosphine (1.5 equiv) in THF (0.1 M) at  $-78\text{ }^{\circ}\text{C}$  under argon. The orange solution was warmed to room temperature and stirred for 2 h. The resulting bright yellow suspension was cooled to  $-78\text{ }^{\circ}\text{C}$  and then a solution of the dimesylate **2** (1.0 equiv) in THF (0.5 M) was added dropwise via cannula over 1 h. The resulting mixture was warmed to room temperature and stirred for an additional 48 h. Upon completion (TLC), the reaction was quenched through the addition of half-saturated aqueous  $\text{NH}_4\text{Cl}$ . The THF was removed through rotary evaporation, and the aqueous phase was extracted three times with  $\text{CH}_2\text{Cl}_2$ . The combined organic phases were carefully treated with 35% aqueous  $\text{H}_2\text{O}_2$  (5.0 equiv) and stirred for 1 h.<sup>a</sup> The mixture was washed with saturated aqueous  $\text{Na}_2\text{S}_2\text{O}_3$  and extracted three times with  $\text{CH}_2\text{Cl}_2$ . The combined organic phases were washed with brine, dried (anhydrous  $\text{Na}_2\text{SO}_4$ ), and concentrated (rotary evaporation). The residue was purified through flash column chromatography ( $\text{SiO}_2$ ; EtOAc/MeOH, 98:2) to give the phosphine oxide **3**. The phosphine oxides **3e/3e'** and **3f/3f'** were prepared following a similar procedure; the crude products were purified through flash column chromatography ( $\text{SiO}_2$ ; EtOAc/MeOH, 100:0  $\rightarrow$  95:5) to give the phosphine oxide **3e/3f** followed by the phosphine oxide **3e'/3f'**.

<sup>a</sup>Hydrogen peroxide is extremely dangerous and care must be taken to avoid generation of highly reactive and potentially explosive organoperoxide compounds. It is important to wash with sodium thiosulfate to quench any such species, as well as use peroxide test strips.

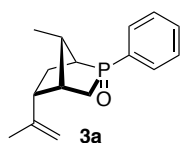

Phosphine Oxide **3a** (85% yield); IR (film)  $\nu_{\text{max}}$  3387, 2964, 2359, 1653  $\text{cm}^{-1}$ ;  $^1\text{H}$  NMR (500 MHz,  $\text{CDCl}_3$ )  $\delta$  7.78–7.74 (m, 2H), 7.52–7.47 (m, 3H), 5.28 (s, 1H), 5.11 (s, 1H), 2.92–2.90 (m, 1H), 2.66 (ddd,  $J = 19.5, 14.0, 6.0$  Hz, 1H), 2.44 (td,  $J = 29.5, 5.0$  Hz, 1H), 2.33–2.03 (m, 4H), 1.84 (t,  $J = 13.5$  Hz, 1H), 1.77 (s, 3H), 1.08 (d,  $J = 7.0$  Hz, 3H);  $^{13}\text{C}$  NMR (125 MHz,  $\text{CDCl}_3$ )  $\delta$  142.5, 134.0 (d,  $J_{\text{CP}} = 89$  Hz), 131.3 (d,  $J_{\text{CP}} = 2.7$  Hz), 130.2 (d,  $J_{\text{CP}} = 8.8$  Hz), 128.5 (d,  $J_{\text{CP}} = 10.8$  Hz), 112.6, 45.1, 44.1, 42.4 (d,  $J_{\text{CP}} = 24.6$  Hz), 42.1 (d,  $J_{\text{CP}} = 24.6$  Hz), 27.3, 26.0, 23.8, 20.2 (d,  $J_{\text{CP}} = 6.6$  Hz), 13.6 (d,  $J_{\text{CP}} = 16.0$  Hz);  $^{31}\text{P}$  NMR (161 MHz,  $\text{CDCl}_3$ )  $\delta$  54.8; HRMS (ESI-TOF) calcd for  $\text{HC}_{16}\text{H}_{21}\text{OP}$  261.1408, found 261.1407.

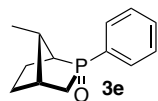

Phosphine Oxide **3e** (54% yield, 80% combined yield); m.p. 79–82  $^{\circ}\text{C}$ ; IR (film)  $\nu_{\text{max}}$  2968, 2876, 1436, 1168  $\text{cm}^{-1}$ ;  $^1\text{H}$  NMR (500 MHz,  $\text{CDCl}_3$ )  $\delta$  7.79–7.74 (m, 2H), 7.54–7.45 (m, 3H), 2.53–2.43 (m, 1H), 2.40–2.27 (m, 3H), 2.12–

1.95 (m, 3H), 1.72–1.58 (m, 2H), 0.95 (d,  $J = 6.7$  Hz, 3H);  $^{13}\text{C}$  NMR (125 MHz,  $\text{CDCl}_3$ )  $\delta$  133.6 (d,  $J_{\text{CP}} = 89.2$  Hz), 131.5 (d,  $J_{\text{CP}} = 2.8$  Hz), 130.3 (d,  $J_{\text{CP}} = 9.3$  Hz), 128.6 (d,  $J_{\text{CP}} = 11.3$  Hz), 42.2 (d,  $J_{\text{CP}} = 46.3$ ), 41.9 (d,  $J_{\text{CP}} = 4.6$  Hz), 41.9 (d,  $J_{\text{CP}} = 4.0$  Hz), 34.4 (d,  $J_{\text{CP}} = 60.7$  Hz), 26.7 (d,  $J_{\text{CP}} = 1.5$  Hz), 17.7 (d,  $J_{\text{CP}} = 7.1$  Hz), 13.7 (d,  $J_{\text{CP}} = 15.6$  Hz);  $^{31}\text{P}$  NMR (202 MHz,  $\text{CDCl}_3$ )  $\delta$  56.0; HRMS (ESI-TOF) calcd for  $\text{HC}_{13}\text{H}_{17}\text{OP}$  221.1095, found 221.1095.

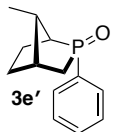

Phosphine Oxide **3e'** (26% yield, 80% combined yield); m.p. 97–98 °C; IR (film)  $\nu_{\text{max}}$  3048, 2963, 2936, 1143  $\text{cm}^{-1}$ ;  $^1\text{H}$  NMR (500 MHz,  $\text{CDCl}_3$ )  $\delta$  7.76–7.67 (m, 2H), 7.55–7.42 (m, 3H), 2.87 (quint,  $J = 6.8$  Hz, 1H), 2.41 (d,  $J = 31.1$  Hz, 1H), 2.18 (t,  $J = 6.0$  Hz, 1H), 2.12–2.03 (m, 2H), 1.91–1.68 (m, 2H), 1.25–1.06 (m, 2H), 1.03 (d,  $J = 6.8$  Hz, 3H);  $^{13}\text{C}$  NMR (125 MHz,  $\text{CDCl}_3$ )  $\delta$  131.7 (d,  $J_{\text{CP}} = 2.8$  Hz), 130.9 (d,  $J_{\text{CP}} = 9.0$  Hz), 130.4 (d,  $J_{\text{CP}} = 90.8$  Hz), 128.5 (d,  $J_{\text{CP}} = 10.9$  Hz), 43.2 (d,  $J_{\text{CP}} = 7.2$  Hz), 42.4 (d,  $J_{\text{CP}} = 68.5$  Hz), 40.2, 36.6 (d,  $J_{\text{CP}} = 58.0$  Hz), 25.9, 18.9 ( $J_{\text{CP}} = 3.6$  Hz), 13.5 (d,  $J_{\text{CP}} = 13.1$  Hz);  $^{31}\text{P}$  NMR (202 MHz,  $\text{CDCl}_3$ )  $\delta$  57.9; HRMS (ESI-TOF) calcd for  $\text{HC}_{13}\text{H}_{17}\text{OP}$  221.1095, found 221.1096.

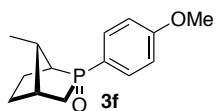

Phosphine Oxide **3f** (53% yield, 82% combined yield); IR (film)  $\nu_{\text{max}}$  2957, 2878, 1597, 1165  $\text{cm}^{-1}$ ;  $^1\text{H}$  NMR (500 MHz,  $\text{CDCl}_3$ )  $\delta$  7.70 (dd,  $J = 8.7, 10.4$  Hz, 2H), 6.99 (dd,  $J = 2.0, 8.8$  Hz, 2H), 3.85 (s, 3H), 2.50–2.43 (m, 1H), 2.38–2.24 (m, 3H), 2.09–1.95 (m, 3H), 1.69–1.65 (m, 1H), 1.60 (dd,  $J = 12.3, 13.6$  Hz, 1H), 0.95 (d,  $J = 6.8$  Hz, 3H);  $^{13}\text{C}$  NMR (125 MHz,  $\text{CDCl}_3$ )  $\delta$  162.1 (d,  $J_{\text{CP}} = 2.8$  Hz), 132.2 ( $J_{\text{CP}} = 10.3$  Hz), 124.8 (d,  $J_{\text{CP}} = 95.2$  Hz), 114.1 ( $J_{\text{CP}} = 12.2$  Hz), 55.2, 42.4 ( $J_{\text{CP}} = 68.1$  Hz), 42.0 ( $J_{\text{CP}} = 12.9$  Hz), 41.9, 34.7 ( $J_{\text{CP}} = 62.0$  Hz), 26.7 (d,  $J_{\text{CP}} = 1.5$  Hz), 17.8 ( $J_{\text{CP}} = 7.1$  Hz), 13.8 ( $J_{\text{CP}} = 15.5$  Hz);  $^{31}\text{P}$  NMR (202 MHz,  $\text{CDCl}_3$ )  $\delta$  55.4; HRMS (ESI-TOF) calcd for  $\text{HC}_{14}\text{H}_{19}\text{O}_2\text{P}$  251.1201, found 251.1206.

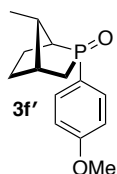

Phosphine Oxide **3f'** (29% yield, 82% combined yield); IR (film)  $\nu_{\text{max}}$  3012, 2967, 1597, 1139  $\text{cm}^{-1}$ ;  $^1\text{H}$  NMR (500 MHz,  $\text{CDCl}_3$ )  $\delta$  7.65 (dd,  $J = 8.8, 10.4$  Hz, 2H), 6.99 (dd,  $J = 2.2, 8.9$  Hz, 2H), 3.85 (s, 3H), 2.84 (quint,  $J = 7.0$  Hz, 1H), 2.40 (d,  $J = 30.3$  Hz, 1H), 2.16 (t,  $J = 6.2$  Hz, 1H), 2.12–2.02 (m, 2H), 1.89–1.72 (m, 2H), 1.26–1.09 (m, 2H), 1.04 (d,  $J = 6.9$  Hz, 3H);  $^{13}\text{C}$  NMR (125 MHz,  $\text{CDCl}_3$ )  $\delta$  162.4 (d,  $J_{\text{CP}} = 2.9$  Hz), 132.9 (d,  $J_{\text{CP}} = 10.1$  Hz), 121.6 (d,  $J_{\text{CP}} = 96.5$  Hz), 114.2 (d,  $J_{\text{CP}} = 12.3$  Hz), 55.4, 43.3 (d,  $J_{\text{CP}} = 7.2$  Hz), 42.7 (d,  $J_{\text{CP}} = 69.4$  Hz), 40.4, 37.1 (d,  $J_{\text{CP}} = 36.8$  Hz), 26.0, 19.1 (d,  $J_{\text{CP}} = 3.7$  Hz), 13.6 (d,  $J_{\text{CP}} = 13.6$  Hz);  $^{31}\text{P}$  NMR (202 MHz,  $\text{CDCl}_3$ )  $\delta$  57.2; HRMS (ESI-TOF) calcd for  $\text{HC}_{14}\text{H}_{19}\text{O}_2\text{P}$  251.1201, found 251.1203.

### 2.3. Preparation of the Phosphine Oxides **3b**, **3c**, and **3d**

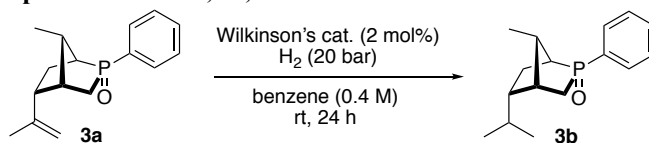

A vial equipped with a magnetic stirrer bar was charged with the phosphine oxide **3a** (3.00 g, 11.5 mmol) and Wilkinson's catalyst (212 mg, 0.230 mmol). Dry benzene (30 mL) was added and then the vial placed in a high-pressure hydrogenation apparatus. After purging the system with H<sub>2</sub>, the pressure of H<sub>2</sub> gas was adjusted to 20 bar and the mixture stirred for 24 h at room temperature. After releasing the pressure, the solvent was removed through rotary evaporation. The residue was purified through flash column chromatography (SiO<sub>2</sub>; EtOAc/MeOH, 98:2) to give the phosphine oxide **3b** (2.7 g, 91% yield) as a white solid. m.p. 91–95 °C; IR (film)  $\nu_{\text{max}}$  2955, 2862, 1435, 1167 cm<sup>-1</sup>; <sup>1</sup>H NMR (500 MHz, CDCl<sub>3</sub>)  $\delta$  7.75–7.74 (m, 2H), 7.51–7.47 (m, 3H), 2.34–2.02 (m, 6H), 1.91–1.79 (m, 3H), 1.01 (d,  $J = 4.5$  Hz, 3H), 1.00 (d,  $J = 6.0$  Hz, 3H), 0.88 (d,  $J = 6.5$  Hz, 3H); <sup>13</sup>C (125 MHz, CDCl<sub>3</sub>)  $\delta$  134.1 (d,  $J_{\text{CP}} = 88.8$  Hz), 131.3 (d,  $J_{\text{CP}} = 2.5$  Hz), 130.2 (d,  $J_{\text{CP}} = 9.0$  Hz), 128.5 (d,  $J_{\text{CP}} = 11.0$  Hz), 44.8 (d,  $J_{\text{CP}} = 29$  Hz), 42.9 (d,  $J_{\text{CP}} = 13.2$  Hz), 42.4 (d,  $J_{\text{CP}} = 67$  Hz), 29.3, 27.5 (d,  $J_{\text{CP}} = 61.5$  Hz), 23.5 (d,  $J_{\text{CP}} = 6.8$  Hz), 22.4, 21.3, 13.5 (d,  $J_{\text{CP}} = 16.2$  Hz); <sup>31</sup>P NMR (161 MHz, CDCl<sub>3</sub>)  $\delta$  54.8; HRMS (ESI-TOF) calcd for HC<sub>16</sub>H<sub>23</sub>OP 263.1565, found 263.1554.

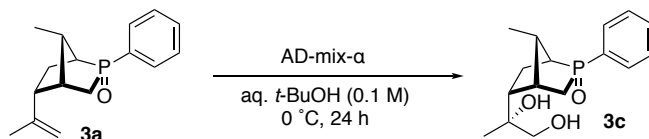

A mixture of AD-mix- $\alpha$  (8.0 g) in 50% aqueous *tert*-butanol (40 mL) was stirred at room temperature until both phases were clear. The mixture was cooled to 0 °C and then a solution of the phosphine oxide **3a** (1.50 g, 5.72 mmol) in 50% aqueous *tert*-butanol (10 mL) was added dropwise. The resulting mixture was stirred vigorously at 0 °C for 24 h before the reaction was quenched through the addition of solid Na<sub>2</sub>SO<sub>3</sub> (8.0 g) at 0 °C. After stirring for an additional 30 min at room temperature, the mixture was extracted with EtOAc (3  $\times$  200 mL). The combined organic phases were washed with brine, dried (anhydrous Na<sub>2</sub>SO<sub>4</sub>), and concentrated (rotary evaporation). The residue was purified through flash column chromatography (SiO<sub>2</sub>; EtOAc/MeOH, 92:8) to give the phosphine oxide **3c** (1.58 g, 94% yield) as a white solid. m.p. 167–171 °C; IR (film)  $\nu_{\text{max}}$  3353, 2933, 1435, 1157 cm<sup>-1</sup>; <sup>1</sup>H NMR (400 MHz, CDCl<sub>3</sub>)  $\delta$  7.77–7.72 (m, 2H), 7.55–7.45 (m, 3H), 4.27 (s, 1H), 3.65 (dd,  $J = 4.8, 10.8$  Hz, 1H), 3.45 (dd,  $J = 4.8, 10.8$  Hz, 1H), 3.24 (dd,  $J = 4.8, 8.0$  Hz, 1H), 2.80 (dd,  $J = 12.8, 14.8$  Hz, 1H), 2.58–2.43 (m, 2H), 2.32–2.10 (m, 4H), 2.03–1.98 (m, 1H), 1.29 (s, 3H), 1.03 (d,  $J = 6.8$  Hz, 3H); <sup>13</sup>C (125 MHz, CDCl<sub>3</sub>)  $\delta$  132.84 (d,  $J_{\text{CP}} = 90$  Hz), 131.7 (d,  $J_{\text{CP}} = 2.5$  Hz), 130.3 (d,  $J_{\text{CP}} = 9.3$  Hz), 128.6 (d,  $J_{\text{CP}} = 11.3$  Hz), 73.7, 69.9, 44.4 (d,  $J_{\text{CP}} = 12.1$  Hz), 44.0, 43.3, 42.3 (d,  $J_{\text{CP}} = 66.2$  Hz), 29.6 (d,  $J_{\text{CP}} = 61.1$  Hz), 26.3, 19.5 (d,  $J_{\text{CP}} = 7.1$  Hz), 13.8 (d,  $J_{\text{CP}} = 15.5$  Hz); <sup>31</sup>P NMR (161 MHz, CDCl<sub>3</sub>)  $\delta$  56.0; HRMS (ESI-TOF) calcd for HC<sub>16</sub>H<sub>23</sub>O<sub>2</sub>P 295.1463, found 295.1465.

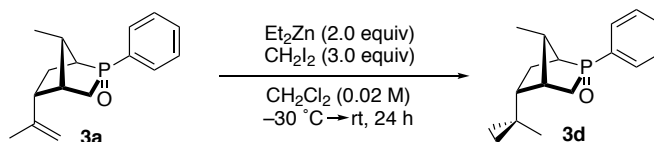

Diethyl zinc (1.13 mL, 11 mmol) was added dropwise to a stirred solution of the phosphine oxide **3a** (1.43 g, 5.5 mmol) in CH<sub>2</sub>Cl<sub>2</sub> (300 mL) at -30 °C. After stirring for 10 min, diiodomethane (1.33 mL, 16.5 mmol) was added dropwise. The reaction mixture was slowly warmed to 0 °C and stirred for 2 h, then warmed to room temperature and stirred for 24 h. Upon completion (TLC), the white suspension was hydrolyzed with water, washed with 1.0 M aqueous NaOH and brine, dried (anhydrous Na<sub>2</sub>SO<sub>4</sub>), and concentrated (rotary evaporation). The residue was purified through flash column chromatography (SiO<sub>2</sub>; EtOAc) to give the phosphine oxide **3d** (650 mg, 43% yield) as a white solid. m.p. 98–101 °C; IR (film)  $\nu_{\text{max}}$  3059, 2948, 1487, 1158 cm<sup>-1</sup>; <sup>1</sup>H NMR (500 MHz, CDCl<sub>3</sub>)  $\delta$  7.79–7.71 (m, 2H), 7.56–7.43 (m, 3H), 2.66 (quint,  $J$  = 5.5 Hz, 1H), 2.45 (dt,  $J$  = 4.8, 30.1 Hz, 1H), 2.30–2.03 (m, 4H), 1.92–1.78 (m, 1H), 1.64 (ddd,  $J$  = 5.9, 14.0, 19.4 Hz, 1H), 1.52 (dt,  $J$  = 4.9, 9.8 Hz, 1H), 1.08 (s, 3H), 1.03 (d,  $J$  = 6.8 Hz, 3H), 0.40 (dt,  $J$  = 5.1, 10.1 Hz, 1H), 0.28 (dt,  $J$  = 4.8, 9.6 Hz, 1H), 0.14 (dt,  $J$  = 4.7, 9.4 Hz, 1H); <sup>13</sup>C NMR (125 MHz, CDCl<sub>3</sub>)  $\delta$  134.3 (d,  $J_{\text{CP}}$  = 89.5 Hz), 131.3 (d,  $J_{\text{CP}}$  = 2.6 Hz), 130.3 (d,  $J_{\text{CP}}$  = 9.0 Hz), 128.5 (d,  $J_{\text{CP}}$  = 11.2 Hz), 45.7, 42.3 (d,  $J_{\text{CP}}$  = 1.7 Hz), 42.0 (d,  $J_{\text{CP}}$  = 55.1 Hz), 41.8, 26.8 (d,  $J_{\text{CP}}$  = 61.3 Hz), 25.3, 18.4 (d,  $J_{\text{CP}}$  = 6.9 Hz), 13.7, 13.6 (d,  $J_{\text{CP}}$  = 16.3 Hz), 9.6, 8.8; <sup>31</sup>P NMR (202 MHz, CDCl<sub>3</sub>)  $\delta$  55.0; HRMS (ESI-TOF) calcd for HC<sub>17</sub>H<sub>23</sub>OP 275.1565, found 275.1566.

## 2.4. General Procedure for Reduction of the Phosphine Oxides

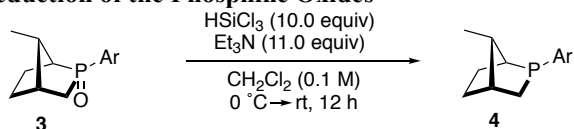

A round-bottom flask equipped with a magnetic stirrer bar was charged with trichlorosilane (10.0 equiv) and  $\text{Et}_3\text{N}$  (11.0 equiv) in  $\text{CH}_2\text{Cl}_2$  (0.1 M) at  $0\text{ }^\circ\text{C}$  under argon protection. A solution of the phosphine oxide **3** (1.0 equiv) in  $\text{CH}_2\text{Cl}_2$  (0.5 M) was added dropwise. The mixture was warmed to room temperature and stirred for 12 h. Upon completion of the reaction (TLC), the mixture was cooled to  $0\text{ }^\circ\text{C}$  and then the reaction was quenched through the addition of degassed saturated aqueous  $\text{NaHCO}_3$ . After stirring for 5 min, solid  $\text{K}_2\text{CO}_3$  and anhydrous  $\text{Na}_2\text{SO}_4$  were added to the mixture with vigorous stirring. The mixture was warmed to room temperature and stirred for 1 h until it became clear. The suspension was filtered through a short plug of silica under argon; the filter cake was rinsed three times with  $\text{CH}_2\text{Cl}_2$ . The combined organic phases were concentrated (rotary evaporation with argon replenishment) to provide the phosphine **4** in a sufficiently pure form to be used directly as a catalyst.

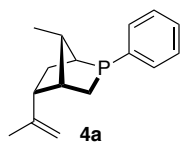

Phosphine **4a** (95% yield); IR (film)  $\nu_{\text{max}}$  3359, 2967, 1646, 1439  $\text{cm}^{-1}$ ;  $^1\text{H}$  NMR (500 MHz,  $\text{CDCl}_3$ )  $\delta$  7.35–7.30 (m, 4H), 7.26–7.21 (m, 1H), 4.97 (s, 1H), 4.95 (s, 1H), 2.75–2.73 (m, 1H), 2.36 (td,  $J = 4.5, 14.0$  Hz, 1H), 2.26 (dd,  $J = 6.5, 10.0$  Hz, 1H), 2.20–2.06 (m, 2H), 1.94 (dd,  $J = 13.5, 25.0$  Hz, 1H), 1.78–1.68 (m, 2H), 1.73 (s, 3H), 1.04 (d,  $J = 7.0$  Hz, 3H);  $^{13}\text{C}$  (125 MHz,  $\text{CDCl}_3$ )  $\delta$  144.7, 130.2, 129.9, 128.2 (d,  $J_{\text{CP}} = 4.3$  Hz), 127.1, 110.2, 45.1 (d,  $J_{\text{CP}} = 3.7$  Hz), 44.2 (d,  $J_{\text{CP}} = 4.1$  Hz), 40.8 (d,  $J_{\text{CP}} = 5.3$  Hz), 25.8, 25.6, 25.0, 24.9, 23.8, 13.1;  $^{31}\text{P}$  NMR (202 MHz,  $\text{CDCl}_3$ )  $\delta$  –7.7; HRMS (ESI-TOF) calcd for  $\text{HC}_{16}\text{H}_{21}\text{P}$  245.1459, found 245.1461.

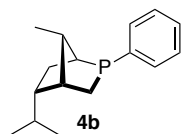

Phosphine **4b** (96% yield); IR (film)  $\nu_{\text{max}}$  3049, 2951, 2929, 2864, 1719, 1432  $\text{cm}^{-1}$ ;  $^1\text{H}$  NMR (500 MHz,  $\text{CDCl}_3$ )  $\delta$  7.57–7.54 (m, 2H), 7.40–7.33 (m, 3H), 2.42–2.24 (m, 4H), 2.09–2.03 (m, 1H), 1.98–1.91 (m, 1H), 1.73–1.68 (m, 1H), 1.57–1.48 (m, 1H), 1.44–1.34 (m, 1H), 1.02 (d,  $J = 6.8$  Hz, 3H), 0.95 (d,  $J = 6.4$  Hz, 1H), 0.87 (d,  $J = 6.4$  Hz, 1H);  $^{13}\text{C}$  NMR (125 MHz,  $\text{CDCl}_3$ )  $\delta$  140.7, 130.0 (d,  $J_{\text{CP}} = 13.6$  Hz), 128.2 (d,  $J_{\text{CP}} = 4.6$  Hz), 127.3, 45.5, 45.1, 43.7, 40.5, 29.9, 29.8, 24.8 (d,  $J_{\text{CP}} = 11.0$  Hz), 22.3, 21.5, 13.1;  $^{31}\text{P}$  NMR (202 MHz,  $\text{CDCl}_3$ )  $\delta$  –6.0; HRMS (ESI-TOF) calcd for  $\text{HC}_{16}\text{H}_{23}\text{P}$  247.1527, found 247.1520.

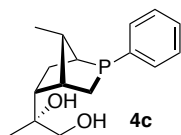

Phosphine **4c** (91% yield); IR (film)  $\nu_{\text{max}}$  3394, 3052, 2930, 1432  $\text{cm}^{-1}$ ;  $^1\text{H}$  (500 MHz,  $\text{CDCl}_3$ )  $\delta$  7.30–7.28 (m, 4H), 7.21–7.17 (m, 1H), 3.69 (d,  $J = 10.5$  Hz, 1H), 3.41 (d,  $J = 10.5$  Hz, 1H), 2.73 (dd,  $J = 12.5, 25.5$  Hz, 1H), 2.33 (bs,



1H), 2.33–1.92 (m, 5H), 1.95–1.92 (m, 1H), 1.71–1.62 (m, 2H), 1.24 (s, 3H), 0.96 (d,  $J = 7.0$  Hz, 3H);  $^{13}\text{C}$  (125 MHz,  $\text{CDCl}_3$ )  $\delta$  143.9 (d,  $J_{\text{CP}} = 26.5$  Hz), 129.7 (d,  $J_{\text{CP}} = 14.0$  Hz), 128.0 (d,  $J_{\text{CP}} = 4.0$  Hz), 126.6, 74.2, 69.1, 46.5, 46.4, 43.5, 43.4 (d,  $J_{\text{CP}} = 2.6$  Hz), 39.8 (d,  $J_{\text{CP}} = 9.0$  Hz), 27.2 (d,  $J_{\text{CP}} = 17.5$  Hz), 25.9 (d,  $J_{\text{CP}} = 22.0$  Hz), 13.5;  $^{31}\text{P}$  NMR (202 MHz,  $\text{CDCl}_3$ )  $\delta$  –8.9; HRMS (ESI-TOF) calcd for  $\text{HC}_{16}\text{H}_{23}\text{O}_2\text{P}$  279.1514, found 279.1513.

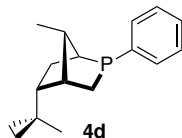

Phosphine **4d** (95% yield); IR (film)  $\nu_{\text{max}}$  3068, 2930, 2872, 1432  $\text{cm}^{-1}$ ;  $^1\text{H}$  NMR (500 MHz,  $\text{CDCl}_3$ )  $\delta$  7.33–7.27 (m, 4H), 7.23–7.17 (m, 1H), 2.48 (dt,  $J = 5.4, 10.7$  Hz, 1H), 2.40 (dd,  $J = 13.0, 26.6$  Hz, 1H), 2.33 (dt,  $J = 4.6, 13.3$  Hz, 1H), 2.11 (dd,  $J = 6.7, 10.8$  Hz, 1H), 1.98 (dd,  $J = 6.6, 13.4$  Hz, 1H), 1.87 (dddd,  $J = 6.7, 11.9, 13.7, 35.3$  Hz, 1H), 1.71 (dt,  $J = 6.0, 11.9$  Hz, 1H), 1.06 (s, 3H), 0.99 (d,  $J = 6.8$  Hz, 3H), 0.95 (dt,  $J = 4.8, 9.7$  Hz, 1H), 0.72 (ddd,  $J = 5.7, 13.7, 19.4$  Hz, 1H), 0.29 (dt,  $J = 5.0, 9.9$  Hz, 1H), 0.15 (dt,  $J = 4.8, 9.6$  Hz, 1H), 0.09 (dt,  $J = 4.7, 9.4$  Hz, 1H);  $^{13}\text{C}$  NMR (125 MHz,  $\text{CDCl}_3$ )  $\delta$  143.1 (d,  $J_{\text{CP}} = 27.0$  Hz), 129.8 (d,  $J_{\text{CP}} = 14.1$  Hz), 128.1 (d,  $J_{\text{CP}} = 4.0$  Hz), 126.5, 46.2 (d,  $J_{\text{CP}} = 4.9$  Hz), 44.6 (d,  $J_{\text{CP}} = 2.6$  Hz), 41.6, 40.6 (d,  $J_{\text{CP}} = 9.0$  Hz), 25.7 (d,  $J_{\text{CP}} = 17.7$  Hz), 25.1, 24.3 (d,  $J_{\text{CP}} = 20.4$  Hz), 13.5 (d,  $J_{\text{CP}} = 76.2$  Hz), 8.6 (d,  $J_{\text{CP}} = 6.8$  Hz), 8.4;  $^{31}\text{P}$  NMR (202 MHz,  $\text{CDCl}_3$ )  $\delta$  –9.4; HRMS (ESI-TOF) calcd for  $\text{HC}_{17}\text{H}_{23}\text{P}$  258.1537, found 258.1537.

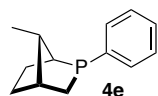

Phosphine **4e** (98% yield); IR (film)  $\nu_{\text{max}}$  3069, 2952, 2928, 1432  $\text{cm}^{-1}$ ;  $^1\text{H}$  NMR (500 MHz,  $\text{CDCl}_3$ )  $\delta$  7.36–7.28 (m, 4H), 7.24–7.19 (m, 1H), 2.24–2.18 (m, 2H), 2.12–1.98 (m, 1H), 1.94–1.78 (m, 4H), 1.66–1.56 (m, 1H), 1.23–1.16 (m, 1H), 0.92 (d,  $J = 6.6$  Hz, 3H);  $^{13}\text{C}$  NMR (125 MHz,  $\text{CDCl}_3$ )  $\delta$  142.9 (d,  $J_{\text{CP}} = 27.0$  Hz), 129.9 (d,  $J_{\text{CP}} = 13.9$  Hz), 128.1 (d,  $J_{\text{CP}} = 4.0$  Hz), 126.6, 44.2 (d,  $J_{\text{CP}} = 5.2$  Hz), 41.2 (d,  $J_{\text{CP}} = 2.7$  Hz), 40.6 (d,  $J_{\text{CP}} = 9.1$  Hz), 32.3 (d,  $J_{\text{CP}} = 17.2$  Hz), 27.6, 23.6 (d,  $J_{\text{CP}} = 22.1$  Hz), 13.6;  $^{31}\text{P}$  NMR (202 MHz,  $\text{CDCl}_3$ )  $\delta$  –6.59; HRMS (ESI-TOF) calcd for  $\text{HC}_{13}\text{H}_{17}\text{P}$  205.1146, found 205.1146.

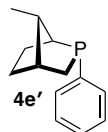

Phosphine **4e'** (94% yield); IR (film)  $\nu_{\text{max}}$  2987, 2854, 1490  $\text{cm}^{-1}$ ;  $^1\text{H}$  NMR (500 MHz,  $\text{CDCl}_3$ )  $\delta$  7.39–7.30 (m, 4H), 7.29–7.23 (m, 1H), 2.30–2.16 (m, 3H), 2.13–2.03 (m, 1H), 1.85–1.76 (m, 1H), 1.75–1.67 (m, 1H), 1.54 (dd,  $J = 5.7, 13.5$  Hz, 1H), 1.41 (m, 1H), 1.05 (d,  $J = 6.7$  Hz, 3H), 1.03–0.96 (m, 1H);  $^{13}\text{C}$  NMR (125 MHz,  $\text{CDCl}_3$ )  $\delta$  139.7 (d,  $J_{\text{CP}} = 26.1$  Hz), 130.8 (d,  $J_{\text{CP}} = 15.2$  Hz), 127.9 (d,  $J_{\text{CP}} = 4.4$  Hz), 127.0, 45.4 (d,  $J_{\text{CP}} = 19.1$  Hz), 42.7 (d,  $J_{\text{CP}} = 2.3$  Hz), 39.8 (d,  $J_{\text{CP}} = 13.0$  Hz), 27.5 (d,  $J_{\text{CP}} = 8.5$  Hz), 27.3 (d,  $J_{\text{CP}} = 1.9$  Hz), 23.3 (d,  $J_{\text{CP}} = 4.0$  Hz), 14.4 (d,  $J_{\text{CP}} = 13.9$  Hz);  $^{31}\text{P}$  NMR (202 MHz,  $\text{CDCl}_3$ )  $\delta$  –4.79; HRMS (ESI-TOF) calcd for  $\text{HC}_{13}\text{H}_{17}\text{P}$  205.1146, found 205.1149.

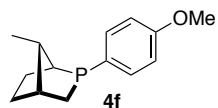

Phosphine **4f** (98% yield); IR (film)  $\nu_{\max}$  3058, 2967, 2853, 1590, 1473  $\text{cm}^{-1}$ ;  $^1\text{H}$  NMR (500 MHz,  $\text{CDCl}_3$ )  $\delta$  7.27 – 7.23 (m, 2H), 6.90 – 6.86 (m, 2H), 3.80 (s, 3H), 2.23 – 2.16 (m, 1H), 2.13 – 1.74 (m, 6H), 1.62 – 1.52 (m, 1H), 1.20 – 1.14 (m, 1H), 0.91 (d,  $J = 6.8$  Hz, 3H);  $^{13}\text{C}$  NMR (125 MHz,  $\text{CDCl}_3$ )  $\delta$  158.8, 133.1 (d,  $J_{\text{CP}} = 24.4$  Hz), 131.4 (d,  $J_{\text{CP}} = 15.6$  Hz), 113.9 (d,  $J_{\text{CP}} = 4.9$  Hz), 55.0, 43.8 (d,  $J_{\text{CP}} = 5.0$  Hz), 41.1 (d,  $J_{\text{CP}} = 2.6$  Hz), 40.9 (d,  $J_{\text{CP}} = 9.4$  Hz), 32.0 (d,  $J_{\text{CP}} = 17.4$  Hz), 27.5, 23.6 (d,  $J_{\text{CP}} = 22.4$  Hz), 13.5;  $^{31}\text{P}$  NMR (202 MHz,  $\text{CDCl}_3$ )  $\delta$  – 8.15; HRMS (ESI-TOF) calcd for  $\text{HC}_{14}\text{H}_{19}\text{OP}$   $m/z$  235.1252, found 235.1252.

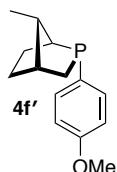

Phosphine **4f'** (99% yield); IR (film)  $\nu_{\max}$  2948, 2871, 1595, 1498, 1247  $\text{cm}^{-1}$ ;  $^1\text{H}$  NMR (500 MHz,  $\text{CDCl}_3$ )  $\delta$  7.28 (dd,  $J = 6.4, 8.6$  Hz, 2H), 6.90 (d,  $J = 8.1$  Hz, 2H), 3.81 (s, 3H), 2.25 (dt,  $J = 5.6, 11.1$  Hz, 1H), 2.21–2.20 (m, 2H), 2.09–1.99 (m, 1H), 1.82–1.69 (m, 2H), 1.48 (dd,  $J = 5.6, 13.4$  Hz, 1H), 1.38–1.32 (m, 1H), 1.06–1.01 (m, 1H), 1.03 (d,  $J = 6.7$  Hz, 3H);  $^{13}\text{C}$  NMR (125 MHz,  $\text{CDCl}_3$ )  $\delta$  159.1, 132.4 (d,  $J_{\text{CP}} = 17.4$  Hz), 129.7 (d,  $J_{\text{CP}} = 23.6$  Hz), 113.7 (d,  $J_{\text{CP}} = 5.7$  Hz), 55.0, 45.4 (d,  $J_{\text{CP}} = 18.8$  Hz), 42.8 (d,  $J_{\text{CP}} = 2.5$  Hz), 40.1 (d,  $J_{\text{CP}} = 13.1$  Hz), 27.5 (d,  $J_{\text{CP}} = 8.1$  Hz), 27.5 (d,  $J_{\text{CP}} = 2.0$  Hz), 22.9 (d,  $J_{\text{CP}} = 4.1$  Hz), 14.4 (d,  $J_{\text{CP}} = 13.8$  Hz);  $^{31}\text{P}$  NMR (202 MHz,  $\text{CDCl}_3$ )  $\delta$  –6.81; HRMS (ESI-TOF) calcd for  $\text{HC}_{14}\text{H}_{19}\text{OP}$  235.1252, found 235.1251.

### 3. Allenoate–Imine [3 + 2] Annulation

#### 3.1. General Procedure for Allenoate–Imine [3 + 2] Annulations

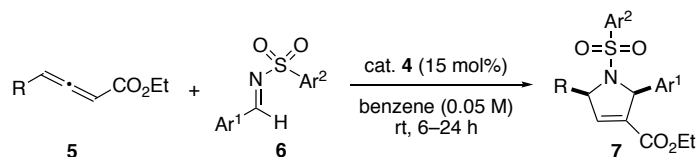

A screw-capped vial equipped with a magnetic stirrer bar was charged with an arylimine **6** (0.1 mmol) and a phosphine **4** (0.015 mmol, added as a stock solution in benzene<sup>a</sup>). An allenoate **5** (0.2 mmol) was added and then the vessel was purged with argon and sealed with a screw cap and Teflon. After stirring at room temperature until completion (indicated by disappearance of the imine via TLC),<sup>b</sup> the mixture was loaded directly onto a silica gel column and purified through flash column chromatography (SiO<sub>2</sub>; EtOAc/hexanes, 1:4) to give the pyrroline product **7**.

<sup>a</sup>The phosphine **4** was dissolved in benzene such that the concentration was 1.8 mg/mL. The stock solution was stored in a Schlenk flask at 0 °C under argon protection. Over the course of 2 weeks, there was no appreciable formation of the phosphine oxide, as determined through TLC or NMR spectroscopic analysis.

<sup>b</sup>The phosphines **4e/4e'** and **4f/4f'** were more reactive relative to the phosphines **4a**, **4b**, **4c**, and **4d**, resulting in reduced reactions times (typically 6–12 hours required for completion).

**Table S1.** Optimization of the Allenoate–Imine [3 + 2] Annulation<sup>a</sup>

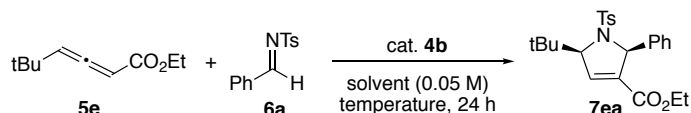

| entry           | <b>4b</b> mol% | solvent         | temperature | additive                      | yield (%) | ee (%) |
|-----------------|----------------|-----------------|-------------|-------------------------------|-----------|--------|
| 1               | 5              | benzene         | rt          | –                             | 58        | 93     |
| 2 <sup>b</sup>  | 5              | benzene         | rt          | –                             | 62        | 93     |
| 3               | 10             | benzene         | rt          | –                             | 77        | 92     |
| 4 <sup>b</sup>  | 10             | benzene         | rt          | –                             | 89        | 93     |
| 5               | 15             | benzene         | rt          | –                             | 94        | 93     |
| 6 <sup>b</sup>  | 15             | benzene         | rt          | –                             | 92        | 93     |
| 7               | 20             | benzene         | rt          | –                             | 93        | 93     |
| 8               | 15             | toluene         | rt          | –                             | 90        | 91     |
| 9               | 15             | acetonitrile    | rt          | –                             | 60        | 40     |
| 10              | 15             | dichloromethane | rt          | –                             | 96        | 58     |
| 11              | 15             | diethyl ether   | rt          | –                             | 86        | 93     |
| 12              | 15             | tetrahydrofuran | rt          | –                             | 84        | 83     |
| 13              | 15             | methanol        | rt          | –                             | NR        | N/A    |
| 14              | 15             | benzene         | 0 °C        | –                             | 78        | 95     |
| 15 <sup>c</sup> | 15             | benzene         | 0 °C        | –                             | 82        | 94     |
| 16 <sup>d</sup> | 15             | benzene         | 40 °C       | –                             | 90        | 92     |
| 17              | 15             | benzene         | rt          | H <sub>2</sub> O (0.15 equiv) | 90        | 75     |
| 18              | 15             | benzene         | rt          | HOAc (0.15 equiv)             | 94        | 90     |
| 19              | 15             | benzene         | rt          | PhOH (0.15 equiv)             | 92        | 93     |

<sup>a</sup>1.0 equiv **6a** (0.1 mmol, 25.9 mg) and 2.0 equiv **5e** (0.2 mmol, 34 μL). <sup>b</sup>1.0 equiv **6a** (3.85 mmol, 1.0 g) and 1.2 equiv **5e** (4.63 mmol, 0.78 mL). <sup>c</sup>Reaction allowed to run for 72 h. <sup>d</sup>Reaction complete within 3 h.

### 3.2. Proposed Transition States

Displayed below are proposed transition states for the reaction between the allenolate **5e** and the imine **6a** catalyzed by the phosphine **4b**. Calculated transition states are available in reference 2h. The key stabilizing factor in the TS leading to the major *S*-enantiomer is hydrogen bonding between the imino *N*-sulfonyl oxygen atom and the two  $\alpha$ -methylene ( $\alpha$  to the phosphorous) hydrogen atoms. In contrast, there is only one stabilizing hydrogen bond between the oxygen atom of the sulfonyl group and the  $\alpha$ -methine hydrogen in the TS leading to the minor *R*-enantiomer. As the bond between the  $\alpha$ -carbon of the phosphonium dienolate and the imino carbon ( $C_{\alpha}$ - $C_{\text{imine}}$ ) forms, the pyramidalization of the  $C_{\alpha}$  of the phosphonium enolate bends the bond between the  $\alpha$ -carbon and the carbonyl carbon of the ester ( $C_{\alpha}$ - $C_{\text{ester}}$ ) and the bond between the  $\alpha$ -carbon and the  $\beta$ -carbon ( $C_{\alpha}$ - $C_{\beta}$ ), placing the  $\gamma$ -carbon away from the approaching imine. In the absence of the second stabilizing hydrogen bond, the bond between the  $\alpha$ -carbon of the phosphonium enolate and the imino carbon is formed to a lesser extent; at this point, the phosphonium dienolate is still relatively flat, causing greater steric repulsion between the imine and the  $\gamma$ -substituent. This arrangement enhances the preference for the TS leading to the major *S*-enantiomer, resulting in the greater enantioselectivity observed upon increasing the size of the  $\gamma$ -substituent.

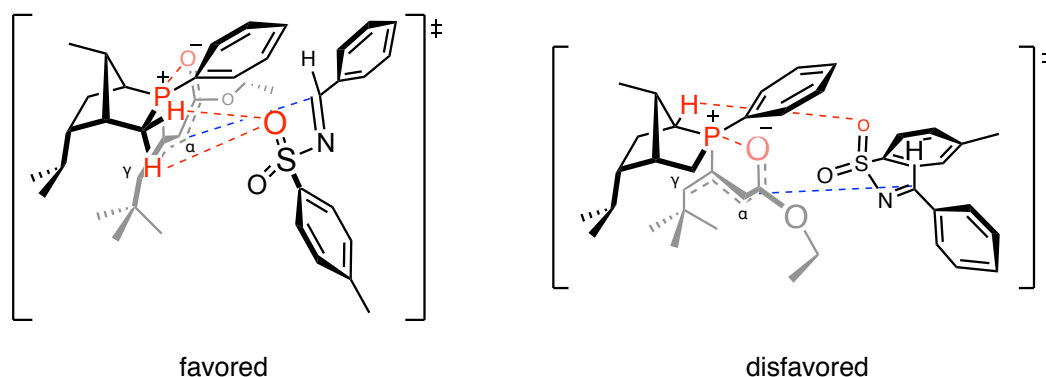

### 3.3. Analytical Data for the Pyrroline Products

Compounds **7aa/7aa'**, **7ba**, **7bp'**, **7ca**, **7da/7da'**, **7ea/7ea'**, **7eb**, **7ec**, **7ed**, **7ee**, and **7eg** (in racemic form) have been synthesized previously; their spectral data are provided in the pertinent references.<sup>2</sup> Complete spectral data are provided for all new compounds. Compounds **7ba**, **7bh'**, **7bm'**, **7bp'**, **7ca**, **7ch**, **7ci'**, **7cn'**, and **7co'** were obtained as an inseparable mixture of *cis* (major) and *trans* (minor) diastereomers. NMR spectral data are provided for the enantiomerically enriched samples of a mixture of the *cis* (major) and *trans* (minor) diastereomers.

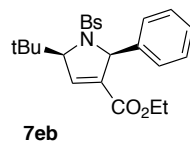

Pyrroline **7eb** (90% yield, 92% ee);  $[\alpha]_{\text{D}} +83.9$  ( $c = 1.00$ ,  $\text{CH}_2\text{Cl}_2$ ,  $23.0^\circ\text{C}$ )

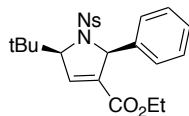

**7ec**

Pyrroline **7ec** (94% yield, 95% ee);  $[\alpha]_D +85.5$  (c = 1.00, CH<sub>2</sub>Cl<sub>2</sub>, 23.0 °C)

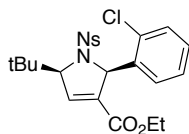

**7ed**

Pyrroline **7ed** (96% yield, 98% ee);  $[\alpha]_D +129.2$  (c = 1.00, CH<sub>2</sub>Cl<sub>2</sub>, 23.0 °C)

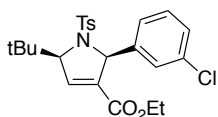

**7ee**

Pyrroline **7ee** (89% yield, 94% ee);  $[\alpha]_D +106.7$  (c = 1.00, CH<sub>2</sub>Cl<sub>2</sub>, 23.0 °C)

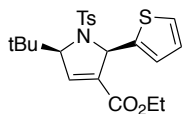

**7eg**

Pyrroline **7eg** (89% yield, 92% ee);  $[\alpha]_D +130.1$  (c = 1.00, CH<sub>2</sub>Cl<sub>2</sub>, 23.0 °C)

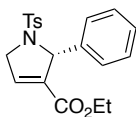

**7aa'**

Pyrroline **7aa'** (93% yield, 84% ee);  $[\alpha]_D -162.2$  (c = 1.00, CH<sub>2</sub>Cl<sub>2</sub>, 24.1 °C)

Recrystallization to >99% ee;  $-193.1$  (c = 1.00, CH<sub>2</sub>Cl<sub>2</sub>, 26.0 °C)

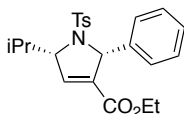

**7da'**

Pyrroline **7da'** (97% yield, 94% ee);  $[\alpha]_D -96.6$  (c = 1.00, CH<sub>2</sub>Cl<sub>2</sub>, 25.3 °C)

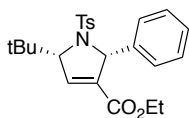

**7ea'**

Pyrroline **7ea'** (94% yield, 99% ee);  $[\alpha]_D -111.8$  (c = 1.00, CH<sub>2</sub>Cl<sub>2</sub>, 24.7 °C)

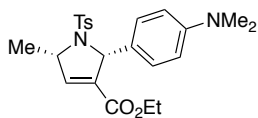

**7bp'**

Pyrroline **7bp'** (96% yield, 94% ee, 99:1 d.r.);  $[\alpha]_D -151.2$  (c = 1.00, CH<sub>2</sub>Cl<sub>2</sub>, 23.6 °C)

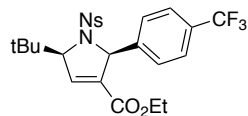

**7ef**

Pyrroline **7ef** (86% yield, 92% ee);  $[\alpha]_D +85.1$  ( $c = 1.00$ ,  $\text{CH}_2\text{Cl}_2$ ,  $23.1\text{ }^\circ\text{C}$ ); IR (film)  $\nu_{\text{max}}$  2968, 2362, 1720, 1533,  $1326\text{ cm}^{-1}$ ;  $^1\text{H}$  NMR (500 MHz,  $\text{CDCl}_3$ )  $\delta$  8.34–8.31 (m, 2H), 8.02–7.98 (m, 2H), 7.59 (s, 4H), 6.78–6.77 (m, 1H), 5.92 (s, 1H), 4.41 (dd,  $J = 0.6, 2.6$  Hz, 1H), 4.13 (q,  $J = 7.1$  Hz, 2H), 1.16 (t,  $J = 7.1$  Hz, 3H), 0.81 (s, 9H);  $^{13}\text{C}$  (125 MHz,  $\text{CDCl}_3$ )  $\delta$  162.1, 150.4, 142.8, 142.7, 141.2, 141.2, 133.6, 129.2, 128.5, 125.2, 124.3, 78.5, 78.5, 68.3, 68.3, 61.4, 36.1, 27.9, 14.0; LRMS (MALDI) calcd for  $\text{C}_{24}\text{H}_{25}\text{F}_3\text{N}_2\text{O}_6\text{SNa}$   $[\text{M} + \text{Na}]^+$  549.13, found 549.2.

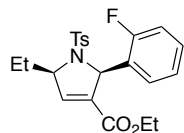

**7ch**

Pyrroline **7ch** (93% yield, 83% ee, 99:1 d.r.); m.p. 128–132  $^\circ\text{C}$ ;  $[\alpha]_D +156.2$  ( $c = 1.00$ ,  $\text{CH}_2\text{Cl}_2$ ,  $23.0\text{ }^\circ\text{C}$ ); IR (film)  $\nu_{\text{max}}$  2977, 2365, 1717,  $1353\text{ cm}^{-1}$ ;  $^1\text{H}$  (500 MHz,  $\text{CDCl}_3$ )  $\delta$  7.67 (d,  $J = 8.3$  Hz, 2H), 7.32–7.19 (m, 4H), 7.06 (t,  $J = 7.5$  Hz, 1H), 6.98 (t,  $J = 9.3$  Hz, 1H), 6.79 (t,  $J = 2.1$  Hz, 1H), 5.90 (s, 1H), 4.58–4.51 (m, 1H), 4.08–3.89 (m, 2H), 2.40 (s, 3H), 2.30–2.21 (m, 1H), 1.95–1.84 (m, 1H), 1.09 (t,  $J = 7.5$  Hz, 3H), 1.05 (t,  $J = 7.1$  Hz, 3H);  $^{13}\text{C}$  (125 MHz,  $\text{CDCl}_3$ )  $\delta$  161.7, 161.4, 143.6, 139.4, 134.3, 133.4, 129.6, 129.4, 129.3, 129.2, 129.2, 127.7, 127.6, 124.0, 123.9, 115.3, 115.1, 68.8, 62.2, 62.1, 60.7, 29.9, 21.4, 13.6, 10.3; HRMS (ESI-TOF) calcd for  $\text{HC}_{22}\text{H}_{25}\text{FNO}_4\text{S}$  418.1488, found 418.1489.

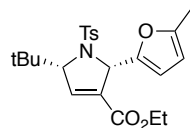

**7ei'**

Pyrroline **7ei'** (94% yield, 99% ee);  $[\alpha]_D -20.6$  ( $c = 1.00$ ,  $\text{CH}_2\text{Cl}_2$ ,  $24.0\text{ }^\circ\text{C}$ ); IR (film)  $\nu_{\text{max}}$  2963, 2924, 1723,  $1167\text{ cm}^{-1}$ ;  $^1\text{H}$  NMR (500 MHz,  $\text{CDCl}_3$ )  $\delta$  7.71 (d,  $J = 8.3$  Hz, 2H), 7.27 (d,  $J = 8.4$  Hz, 2H), 6.76 (t,  $J = 2.0$  Hz, 1H), 6.03 (d,  $J = 3.0$  Hz, 1H), 5.85 (d,  $J = 2.8$  Hz, 1H), 5.80 (s, 1H), 4.52 (t,  $J = 1.2$  Hz, 1H), 4.19–4.03 (m, 2H), 2.41 (s, 3H), 2.16 (s, 3H), 1.16 (t,  $J = 7.1$  Hz, 3H), 0.93 (s, 9H);  $^{13}\text{C}$  NMR (125 MHz,  $\text{CDCl}_3$ )  $\delta$  162.1, 151.3, 150.0, 143.7, 140.6, 135.0, 132.1, 129.5, 128.0, 109.5, 106.3, 63.4, 60.6, 36.3, 27.5, 21.4, 13.9, 13.4; HRMS (ESI-TOF) calcd for  $\text{HC}_{23}\text{H}_{29}\text{NO}_5\text{S}$  432.1845, found 432.1845.

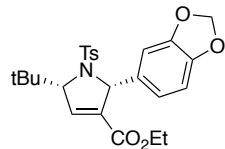

**7ej'**

Pyrroline **7ej'** (94% yield, 98% ee); m.p. 118–122  $^\circ\text{C}$ ;  $[\alpha]_D -171.5$  ( $c = 1.00$ ,  $\text{CH}_2\text{Cl}_2$ ,  $23.2\text{ }^\circ\text{C}$ ); IR (film)  $\nu_{\text{max}}$  2965, 2905, 1718, 1247,  $1165\text{ cm}^{-1}$ ;  $^1\text{H}$  NMR (500 MHz,  $\text{CDCl}_3$ )  $\delta$  7.70 (d,  $J = 8.3$  Hz, 2H), 7.26 (d,  $J = 8.2$  Hz, 2H), 7.06 (d,  $J = 1.6$  Hz, 1H), 6.76 (dd,  $J = 1.7, 8.1$  Hz, 1H), 6.72–6.68 (m, 2H), 5.94 (s, 2H), 5.79 (s, 1H), 4.33 (d,  $J = 2.6$  Hz, 1H), 4.11 (dq,  $J = 1.1, 7.1$  Hz, 2H), 2.40 (s, 3H), 1.15 (t,  $J = 7.1$  Hz, 3H), 0.84 (s, 9H);  $^{13}\text{C}$  NMR (125 MHz,  $\text{CDCl}_3$ )  $\delta$  162.5, 147.4, 146.9, 143.8, 141.1, 134.1, 134.0, 133.5, 129.5, 127.9, 121.4, 108.9, 107.4, 100.9, 77.7, 68.2, 60.8, 35.9, 27.9, 21.4, 13.9; HRMS (ESI-TOF) calcd for  $\text{HC}_{25}\text{H}_{29}\text{NO}_6\text{S}$  472.1794, found 472.1796.

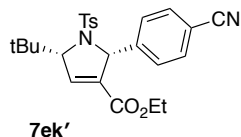

Pyrroline **7ek'** (98% yield, 98% ee); m.p. 92–95 °C;  $[\alpha]_{\text{D}} -107.0$  ( $c = 1.00$ ,  $\text{CH}_2\text{Cl}_2$ , 23.8 °C); IR (film)  $\nu_{\text{max}}$  2966, 2229, 1719, 1166  $\text{cm}^{-1}$ ;  $^1\text{H}$  NMR (500 MHz,  $\text{CDCl}_3$ )  $\delta$  7.71 (d,  $J = 8.3$  Hz, 2H), 7.63–7.56 (m, 4H), 7.29 (d,  $J = 8.1$  Hz, 2H), 6.76 (q,  $J = 1.3$  Hz, 1H), 5.85 (s, 1H), 4.35 (d,  $J = 2.7$  Hz, 1H), 4.13 (q,  $J = 7.1$  Hz, 2H), 2.42 (s, 3H), 1.16 (t,  $J = 7.1$  Hz, 3H), 0.79 (s, 9H);  $^{13}\text{C}$  NMR (125 MHz,  $\text{CDCl}_3$ )  $\delta$  162.2, 144.9, 144.2, 142.3, 133.4, 133.1, 131.8, 129.7, 128.8, 127.9, 118.6, 111.5, 78.0, 67.8, 61.1, 35.8, 27.7, 21.5, 13.9; HRMS (ESI-TOF) calcd for  $\text{HC}_{25}\text{H}_{28}\text{N}_2\text{O}_4\text{S}$  453.1848, found 453.1848.

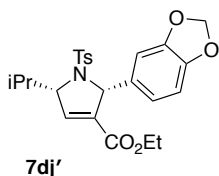

Pyrroline **7dj'** (92% yield, 93% ee); m.p. 90–95 °C;  $[\alpha]_{\text{D}} -183.1$  ( $c = 1.00$ ,  $\text{CH}_2\text{Cl}_2$ , 23.8 °C); IR (film)  $\nu_{\text{max}}$  2962, 2927, 1718, 1164  $\text{cm}^{-1}$ ;  $^1\text{H}$  NMR (500 MHz,  $\text{CDCl}_3$ )  $\delta$  7.59 (d,  $J = 8.3$  Hz, 2H), 7.24 (t,  $J = 8.7$  Hz, 2H), 6.89–6.83 (m, 2H), 6.75–6.71 (m, 2H), 5.93 (s, 2H), 5.63 (t,  $J = 2.0$  Hz, 1H), 4.44 (dt,  $J = 2.5, 5.7$  Hz, 1H), 4.10–3.99 (m, 2H), 2.39 (s, 3H), 2.13 (sex,  $J = 6.7$  Hz, 1H), 1.11 (t,  $J = 7.1$  Hz, 3H), 1.06 (d,  $J = 7.0$  Hz, 3H), 0.91 (d,  $J = 6.8$  Hz, 3H);  $^{13}\text{C}$  NMR (125 MHz,  $\text{CDCl}_3$ )  $\delta$  162.1, 147.3, 147.2, 143.5, 138.5, 135.0, 134.3, 133.8, 129.5, 127.6, 122.0, 108.6, 107.7, 100.9, 73.2, 69.0, 60.7, 32.9, 21.4, 20.1, 18.0, 13.8; HRMS (ESI-TOF) calcd for  $\text{HC}_{24}\text{H}_{27}\text{NO}_6\text{S}$  458.1637, found 458.1642.

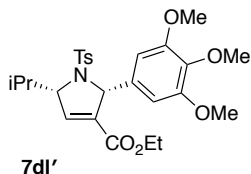

Pyrroline **7dl'** (95% yield, 95% ee); m.p. 118–121 °C;  $[\alpha]_{\text{D}} -202.5$  ( $c = 1.00$ ,  $\text{CH}_2\text{Cl}_2$ , 23.7 °C); IR (film)  $\nu_{\text{max}}$  2961, 2935, 1720, 1164, 1125  $\text{cm}^{-1}$ ;  $^1\text{H}$  NMR (500 MHz,  $\text{CDCl}_3$ )  $\delta$  7.52 (d,  $J = 8.3$  Hz, 2H), 7.19 (d,  $J = 8.2$  Hz, 2H), 6.73 (t,  $J = 2.0$  Hz, 1H), 6.59 (s, 2H), 5.71 (t,  $J = 2.1$  Hz, 1H), 4.53 (quint,  $J = 2.6$  Hz, 1H), 4.12–3.99 (m, 2H), 3.82 (s, 3H), 3.78 (s, 6H), 2.37 (s, 3H), 2.16 (sex,  $J = 6.7$  Hz, 1H), 1.10 (q,  $J = 7.1$  Hz, 6H), 0.91 (d,  $J = 6.8$  Hz, 3H);  $^{13}\text{C}$  NMR (125 MHz,  $\text{CDCl}_3$ )  $\delta$  162.2, 152.7, 143.5, 138.2, 137.5, 135.5, 135.2, 134.4, 129.3, 127.4, 105.4, 73.1, 69.3, 60.7, 55.9, 32.7, 21.4, 20.0, 17.9, 13.9; HRMS (ESI-TOF) calcd for  $\text{HC}_{26}\text{H}_{33}\text{NO}_7\text{S}$  504.2056, found 504.2056.

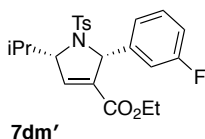

Pyrroline **7dm'** (97% yield, 93% ee); m.p. 109–110 °C;  $[\alpha]_{\text{D}} -102.5$  ( $c = 1.00$ ,  $\text{CH}_2\text{Cl}_2$ , 25.5 °C); IR (film)  $\nu_{\text{max}}$  2963, 2930, 1720, 1260, 1165  $\text{cm}^{-1}$ ;  $^1\text{H}$  NMR (500 MHz,  $\text{CDCl}_3$ )  $\delta$  7.58 (d,  $J = 8.2$  Hz, 2H), 7.29–7.21 (m, 3H), 7.18 (d,  $J = 7.8$  Hz, 1H), 7.07 (d,  $J = 9.9$  Hz, 1H), 6.96 (td,  $J = 1.9, 8.3$  Hz, 1H), 6.77 (t,  $J = 1.8$  Hz, 1H), 5.69 (s, 1H), 4.48 (dt,  $J = 2.3, 5.8$  Hz, 1H), 4.11–3.96 (m, 2H), 2.39 (s, 3H), 2.13 (sex,  $J = 6.7$  Hz, 1H), 1.11–1.05 (m, 6H), 0.91 (d,  $J = 6.8$

Hz, 3H);  $^{13}\text{C}$  NMR (125 MHz,  $\text{CDCl}_3$ )  $\delta$  161.9, 143.7, 142.4, 142.3, 139.1, 134.8, 134.0, 129.5, 129.5, 127.6, 124.0, 115.2, 115.1, 114.9, 114.7, 73.3, 68.6, 60.8, 32.8, 21.4, 20.1, 17.9, 13.8; HRMS (ESI-TOF) calcd for  $\text{HC}_{23}\text{H}_{26}\text{FNO}_4\text{S}$  432.1645, found 432.1646.

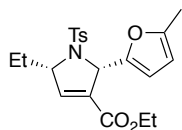

**7ci'**

Pyrroline **7ci'** (95% yield, 90% ee, 98:2 d.r.);  $[\alpha]_{\text{D}} -136.3$  ( $c = 1.00$ ,  $\text{CH}_2\text{Cl}_2$ ,  $23.5\text{ }^\circ\text{C}$ ); IR (film)  $\nu_{\text{max}}$  2974, 2924, 1720,  $1162\text{ cm}^{-1}$ ;  $^1\text{H}$  NMR (500 MHz,  $\text{CDCl}_3$ )  $\delta$  7.60 (d,  $J = 8.2\text{ Hz}$ , 2H), 7.22 (d,  $J = 8.0\text{ Hz}$ , 2H), 6.75 (t,  $J = 1.9\text{ Hz}$ , 1H), 6.16 (d,  $J = 3.1\text{ Hz}$ , 1H), 5.85 (d,  $J = 2.2\text{ Hz}$ , 1H), 5.72 (s, 1H), 4.63–4.57 (m, 1H), 4.15–4.03 (m, 2H), 2.39 (s, 3H), 2.17 (s, 3H), 1.96–1.89 (m, 1H), 1.81–1.75 (m, 1H), 1.16 (t,  $J = 7.1\text{ Hz}$ , 3H), 0.96 (t,  $J = 7.5\text{ Hz}$ , 3H);  $^{13}\text{C}$  NMR (125 MHz,  $\text{CDCl}_3$ )  $\delta$  161.9, 151.7, 150.1, 143.3, 140.4, 135.9, 131.9, 129.4, 127.3, 109.3, 106.4, 68.1, 62.4, 60.7, 28.9, 21.4, 13.9, 13.4, 9.7; HRMS (ESI-TOF) calcd for  $\text{HC}_{21}\text{H}_{25}\text{NO}_5\text{S}$  404.1532, found 404.1528.

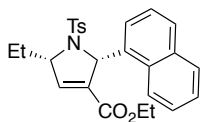

**7cn'**

Pyrroline **7cn'** (93% yield, 97% ee, >99:1 d.r.); m.p.  $105\text{--}108\text{ }^\circ\text{C}$ ;  $[\alpha]_{\text{D}} -41.3$  ( $c = 1.00$ ,  $\text{CH}_2\text{Cl}_2$ ,  $23.3\text{ }^\circ\text{C}$ ); IR (film)  $\nu_{\text{max}}$  3063, 2925, 1719, 1597, 1568,  $1156\text{ cm}^{-1}$ ;  $^1\text{H}$  NMR (500 MHz,  $\text{CDCl}_3$ )  $\delta$  8.34 (d,  $J = 8.6\text{ Hz}$ , 1H), 7.76 (d,  $J = 8.0\text{ Hz}$ , 1H), 7.67 (d,  $J = 8.0\text{ Hz}$ , 1H), 7.53 (t,  $J = 7.2\text{ Hz}$ , 1H), 7.44 (t,  $J = 7.4\text{ Hz}$ , 1H), 7.40–7.29 (m, 4H), 6.89 (t,  $J = 7.3\text{ Hz}$ , 3H), 6.61 (s, 1H), 4.87–4.80 (m, 1H), 3.89–3.76 (m, 2H), 2.37–2.28 (m, 1H), 2.22 (s, 3H), 2.01–1.89 (m, 1H), 1.15 (t,  $J = 7.5\text{ Hz}$ , 3H), 0.75 (t,  $J = 7.1\text{ Hz}$ , 3H);  $^{13}\text{C}$  NMR (125 MHz,  $\text{CDCl}_3$ )  $\delta$  162.1, 143.0, 138.4, 136.4, 135.5, 135.2, 133.3, 131.4, 128.8, 128.2, 128.2, 127.4, 126.1, 125.8, 125.3, 124.9, 123.3, 68.5, 63.8, 60.5, 29.8, 21.2, 13.4, 10.5; HRMS (ESI-TOF) calcd for  $\text{HC}_{26}\text{H}_{27}\text{NO}_4\text{S}$  450.1739, found 450.1732.

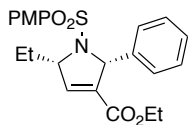

**7co'**

Pyrroline **7co'** (99% yield, 92% ee, >99:1 d.r.); m.p.  $88\text{--}92\text{ }^\circ\text{C}$ ;  $[\alpha]_{\text{D}} -96.1$  ( $c = 1.00$ ,  $\text{CH}_2\text{Cl}_2$ ,  $23.0\text{ }^\circ\text{C}$ ); IR (film)  $\nu_{\text{max}}$  2977, 2931, 1719, 1260,  $1159\text{ cm}^{-1}$ ;  $^1\text{H}$  NMR (500 MHz,  $\text{CDCl}_3$ )  $\delta$  7.62–7.58 (m, 2H), 7.33–7.30 (m, 2H), 7.29–7.23 (m, 3H), 6.88–6.83 (m, 2H), 6.78 (t,  $J = 2.0\text{ Hz}$ , 1H), 5.67 (t,  $J = 1.9\text{ Hz}$ , 1H), 4.62–4.56 (m, 1H), 4.09–3.94 (m, 2H), 3.83 (s, 3H), 2.12–2.03 (m, 1H), 1.80–1.70 (m, 1H), 1.08 (t,  $J = 7.1\text{ Hz}$ , 3H), 1.03 (t,  $J = 7.6\text{ Hz}$ , 3H);  $^{13}\text{C}$  NMR (125 MHz,  $\text{CDCl}_3$ )  $\delta$  162.8, 162.1, 140.0, 139.3, 134.2, 130.2, 129.5, 128.1, 127.9, 127.8, 114.0, 69.3, 68.6, 60.7, 55.4, 29.7, 13.8, 10.3; HRMS (ESI-TOF) calcd for  $\text{HC}_{22}\text{H}_{25}\text{NO}_5\text{S}$  416.1532, found 416.1533.

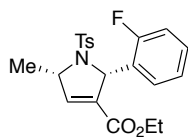

**7bh'**

Pyrroline **7bh'** (95% yield, 90% ee, 96:4 d.r.); m.p.  $87\text{--}93\text{ }^\circ\text{C}$ ;  $[\alpha]_{\text{D}} -191.8$  ( $c = 1.00$ ,  $\text{CH}_2\text{Cl}_2$ ,  $22.9\text{ }^\circ\text{C}$ ); IR (film)  $\nu_{\text{max}}$



2979, 2931, 1720, 1165  $\text{cm}^{-1}$ ;  $^1\text{H}$  NMR (500 MHz,  $\text{CDCl}_3$ )  $\delta$  7.67 (d,  $J = 8.2$ , 2H), 7.26–7.19 (m, 4H), 7.07 (t,  $J = 7.5$  Hz, 1H), 6.97 (t,  $J = 9.3$  Hz, 1H), 5.89 (s, 1H), 4.82–4.72 (m, 1H), 4.07–3.91 (m, 2H), 2.39 (s, 3H), 1.64 (d,  $J = 6.7$  Hz, 3H), 1.05 (t,  $J = 7.1$  Hz, 3H);  $^{13}\text{C}$  NMR (125 MHz,  $\text{CDCl}_3$ )  $\delta$  161.7, 159.5, 143.6, 141.0, 134.5, 132.8, 129.6, 129.4, 129.4, 128.9, 127.6, 127.5, 126.6, 124.0, 124.0, 115.3, 115.1, 62.9, 62.5, 62.5, 60.7, 22.3, 21.4, 13.6; HRMS (ESI-TOF) calcd for  $\text{HC}_{21}\text{H}_{22}\text{FNO}_4\text{S}$  404.1332, found 404.1333.

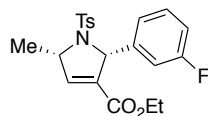

**7bm'**

Pyrroline **7bm'** (95% yield, 91% ee, 96:4 d.r.);  $[\alpha]_{\text{D}} -137.8$  ( $c = 1.00$ ,  $\text{CH}_2\text{Cl}_2$ , 23.4 °C); IR (film)  $\nu_{\text{max}}$  2979, 2926, 1719, 1263, 1165  $\text{cm}^{-1}$ ;  $^1\text{H}$  NMR (500 MHz,  $\text{CDCl}_3$ )  $\delta$  7.58 (d,  $J = 8.2$  Hz, 2H), 7.26–7.10 (m, 4H), 7.02–6.91 (m, 2H), 6.65 (t,  $J = 1.8$  Hz, 1H), 5.63 (s, 1H), 4.82–4.74 (m, 1H), 4.08–3.97 (m, 2H), 2.38 (s, 3H), 1.56 (d,  $J = 6.7$  Hz, 3H), 1.10 (t,  $J = 7.1$  Hz, 3H);  $^{13}\text{C}$  NMR (125 MHz,  $\text{CDCl}_3$ )  $\delta$  163.5, 161.8, 161.6, 143.6, 142.6, 142.5, 141.0, 135.2, 133.3, 129.6, 129.5, 127.4, 123.7, 123.6, 114.9, 114.8, 114.7, 114.6, 69.0, 62.8, 60.8, 22.3, 21.4, 13.8; HRMS (ESI-TOF) calcd for  $\text{HC}_{21}\text{H}_{22}\text{FNO}_4\text{S}$  404.1332, found 404.1329.

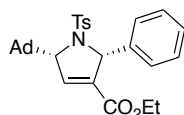

**7fa'**

Pyrroline **7fa'** (95% yield, 98% ee); m.p. 144–146 °C;  $[\alpha]_{\text{D}} -31.5$  ( $c = 1.00$ ,  $\text{CH}_2\text{Cl}_2$ , 25.5 °C); IR (film)  $\nu_{\text{max}}$  2903, 2849, 1718, 1165  $\text{cm}^{-1}$ ;  $^1\text{H}$  NMR (500 MHz,  $\text{CDCl}_3$ )  $\delta$  7.72 (d,  $J = 8.3$  Hz, 2H), 7.42 (d,  $J = 7.5$  Hz, 2H), 7.32–7.25 (m, 5H), 6.76 (q,  $J = 1.3$  Hz, 1H), 5.86 (s, 1H), 4.19 (d,  $J = 2.6$  Hz, 1H), 4.10 (q,  $J = 7.1$  Hz, 2H), 2.40 (s, 3H), 1.84 (br s, 3H), 1.57 (d,  $J = 11.7$  Hz, 3H), 1.47 (d,  $J = 12.0$  Hz, 6H), 1.32 (d,  $J = 12.2$  Hz, 3H), 1.13 (t,  $J = 7.1$  Hz, 3H);  $^{13}\text{C}$  NMR (125 MHz,  $\text{CDCl}_3$ )  $\delta$  162.6, 143.7, 140.7, 139.5, 134.1, 134.0, 129.5, 128.0, 127.9, 127.9, 127.5, 78.4, 68.2, 60.7, 39.9, 37.7, 36.4, 28.2, 21.4, 13.9; HRMS (ESI-TOF) calcd for  $\text{HC}_{30}\text{H}_{35}\text{NO}_4\text{S}$  506.2365, found 503.2369.

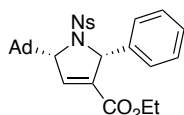

**7fc'**

Pyrroline **7fc'** (88% yield, 92% ee); m.p. 210–212 °C (decomp);  $[\alpha]_{\text{D}} -20.4$  ( $c = 1.00$ ,  $\text{CH}_2\text{Cl}_2$ , 23.8 °C); IR (film)  $\nu_{\text{max}}$  2904, 2849, 1955, 1718, 1531  $\text{cm}^{-1}$ ;  $^1\text{H}$  NMR (500 MHz,  $\text{CDCl}_3$ )  $\delta$  8.30 (d,  $J = 8.8$  Hz, 2H), 7.95 (d,  $J = 8.8$  Hz, 2H), 7.42 (d,  $J = 7.3$  Hz, 2H), 7.35–7.29 (m, 3H), 6.79 (q,  $J = 1.3$  Hz, 1H), 5.92 (s, 1H), 4.28 (d,  $J = 2.4$  Hz, 1H), 4.11 (q,  $J = 3.4$  Hz, 2H), 1.86 (br s, 3H), 1.73–1.65 (m, 3H), 1.46 (d,  $J = 12.7$  Hz, 6H), 1.35 (d,  $J = 12.0$  Hz, 3H), 1.14 (t,  $J = 7.1$  Hz, 3H);  $^{13}\text{C}$  NMR (125 MHz,  $\text{CDCl}_3$ )  $\delta$  162.2, 150.0, 143.4, 139.8, 138.6, 134.0, 128.9, 128.1, 128.1, 124.0, 78.8, 68.7, 61.0, 42.5, 39.9, 37.9, 36.4, 36.3, 28.5, 28.1, 13.9; HRMS (ESI-TOF) calcd for  $\text{HC}_{29}\text{H}_{32}\text{N}_2\text{O}_6\text{S}$  537.2059, found 537.2063.

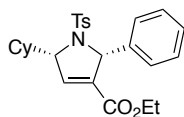

**7ga'**

Pyrroline **7ga'** (91% yield, 94% ee); m.p. 114–116 °C;  $[\alpha]_D -52.8$  ( $c = 1.00$ ,  $\text{CH}_2\text{Cl}_2$ , 23.1 °C); IR (film)  $\nu_{\text{max}}$  2928, 2852, 1720, 1165  $\text{cm}^{-1}$ ;  $^1\text{H}$  NMR (500 MHz,  $\text{CDCl}_3$ )  $\delta$  7.54 (d,  $J = 8.2$  Hz, 2H), 7.37 (dd,  $J = 1.7, 8.0$  Hz, 2H), 7.31–7.26 (m, 3H), 7.20 (d,  $J = 8.0$  Hz, 2H), 6.77 (t,  $J = 1.9$  Hz, 1H), 5.72 (t,  $J = 1.9$  Hz, 1H), 4.49 (dt,  $J = 2.6, 5.1$  Hz, 1H), 4.08–3.93 (m, 2H), 2.38 (s, 3H), 1.86 (d,  $J = 11.4$  Hz, 1H), 1.81–1.63 (m, 5H), 1.23–1.08 (m, 4H), 1.05 (t,  $J = 7.1$  Hz, 3H), 0.99–0.88 (m, 1H);  $^{13}\text{C}$  NMR (125 MHz,  $\text{CDCl}_3$ )  $\delta$  162.2, 143.4, 139.7, 139.2, 135.2, 133.9, 129.4, 128.3, 128.0, 127.8, 127.5, 72.6, 69.0, 60.6, 42.4, 30.6, 28.7, 26.2, 25.8, 21.4, 13.8; HRMS (ESI-TOF) calcd for  $\text{HC}_{26}\text{H}_{31}\text{NO}_4\text{S}$  454.2052, found 452.2054.

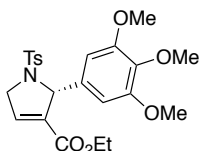

**7al'**

Pyrroline **7al'** (91% yield, 87% ee);  $[\alpha]_D -105.3$  ( $c = 1.00$ ,  $\text{CH}_2\text{Cl}_2$ , 23.5 °C); IR (film)  $\nu_{\text{max}}$  2928, 2853, 1721, 1163, 1126  $\text{cm}^{-1}$ ;  $^1\text{H}$  NMR (500 MHz,  $\text{CDCl}_3$ )  $\delta$  7.38 (d,  $J = 8.3$  Hz, 2H), 7.13 (d,  $J = 8.1$  Hz, 2H), 6.79 (d,  $J = 1.8$  Hz, 1H), 6.32 (s, 2H), 5.70 (dt,  $J = 1.8, 5.8$  Hz, 1H), 4.57 (dt,  $J = 2.3, 17.0$  Hz, 1H), 4.36 (ddd,  $J = 1.9, 5.9, 17.0$  Hz, 1H), 4.11–4.01 (m, 2H), 3.81 (s, 3H), 3.71 (s, 6H), 2.35 (s, 3H), 1.14 (t,  $J = 7.1$  Hz, 3H);  $^{13}\text{C}$  NMR (125 MHz,  $\text{CDCl}_3$ )  $\delta$  161.7, 152.8, 143.1, 137.6, 136.0, 135.8, 135.2, 134.4, 129.1, 126.9, 104.8, 69.0, 60.8, 60.7, 55.8, 54.7, 21.3, 13.9; HRMS (ESI-TOF) calcd for  $\text{HC}_{23}\text{H}_{27}\text{NO}_7\text{S}$  462.1587, found 462.1591.

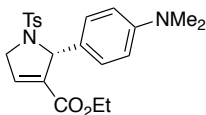

**7ap'**

Pyrroline **7ap'** (90% yield, 92% ee);  $[\alpha]_D -29.300$  ( $c = 1.00$ ,  $\text{CH}_2\text{Cl}_2$ , 24.1 °C); IR (film)  $\nu_{\text{max}}$  2923, 2853, 1719, 1162  $\text{cm}^{-1}$ ;  $^1\text{H}$  NMR (500 MHz,  $\text{CDCl}_3$ )  $\delta$  7.41 (d,  $J = 8.2$  Hz, 2H), 7.12 (d,  $J = 8.0$  Hz, 2H), 7.03 (d,  $J = 8.7$  Hz, 2H), 6.73 (d,  $J = 1.6$  Hz, 1H), 6.55 (d,  $J = 8.7$  Hz, 2H), 5.68 (d,  $J = 5.5$  Hz, 1H), 4.46 (dt,  $J = 2.2, 16.9$  Hz, 1H), 4.33 (ddd,  $J = 1.8, 5.7, 16.9$  Hz, 1H), 4.07–3.99 (m, 2H), 2.92 (s, 6H), 2.36 (s, 3H), 1.12 (t,  $J = 7.1$  Hz, 3H);  $^{13}\text{C}$  NMR (125 MHz,  $\text{CDCl}_3$ )  $\delta$  161.9, 150.2, 142.7, 136.1, 135.8, 134.6, 129.2, 128.4, 127.0, 112.1, 68.6, 60.6, 54.5, 40.5, 21.4, 13.8; HRMS (ESI-TOF) calcd for  $\text{HC}_{22}\text{H}_{26}\text{N}_2\text{O}_4\text{S}$  415.1692, found 415.1692.

## 4. Separation of Enantiomers

### 4.1. HPLC Conditions

Table S2. Separation of Enantiomers

| Compound | Column                        | Solvents                                         | Flow Rate  |
|----------|-------------------------------|--------------------------------------------------|------------|
| 7aa      | Regis ( <i>R,R</i> )-DACH DNB | CH <sub>2</sub> Cl <sub>2</sub> /Hexanes (60:40) | 2.0 mL/min |
| 7ba      | Regis ( <i>R,R</i> )-DACH DNB | CH <sub>2</sub> Cl <sub>2</sub> /Hexanes (60:40) | 2.0 mL/min |
| 7ca      | Regis ( <i>R,R</i> )-DACH DNB | CH <sub>2</sub> Cl <sub>2</sub> /Hexanes (60:40) | 2.0 mL/min |
| 7da      | Regis ( <i>R,R</i> )-DACH DNB | CH <sub>2</sub> Cl <sub>2</sub> /Hexanes (60:40) | 2.0 mL/min |
| 7ea      | Regis ( <i>R,R</i> )-DACH DNB | CH <sub>2</sub> Cl <sub>2</sub> /Hexanes (60:40) | 2.0 mL/min |
| 7eb      | Regis ( <i>R,R</i> )-DACH DNB | CH <sub>2</sub> Cl <sub>2</sub> /Hexanes (60:40) | 2.0 mL/min |
| 7ec      | Regis ( <i>R,R</i> )-DACH DNB | CH <sub>2</sub> Cl <sub>2</sub> /Hexanes (60:40) | 2.0 mL/min |
| 7ed      | Regis ( <i>R,R</i> )-DACH DNB | CH <sub>2</sub> Cl <sub>2</sub> /Hexanes (60:40) | 2.0 mL/min |
| 7ee      | Regis ( <i>R,R</i> )-DACH DNB | CH <sub>2</sub> Cl <sub>2</sub> /Hexanes (60:40) | 2.0 mL/min |
| 7ef      | Regis ( <i>R,R</i> )-DACH DNB | CH <sub>2</sub> Cl <sub>2</sub> /Hexanes (60:40) | 2.0 mL/min |
| 7eg      | Regis ( <i>R,R</i> )-DACH DNB | CH <sub>2</sub> Cl <sub>2</sub> /Hexanes (60:40) | 2.0 mL/min |
| 7ch      | Regis ( <i>R,R</i> )-DACH DNB | CH <sub>2</sub> Cl <sub>2</sub> /Hexanes (60:40) | 2.0 mL/min |
| 7da      | Regis ( <i>R,R</i> )-DACH DNB | CH <sub>2</sub> Cl <sub>2</sub> /Hexanes (60:40) | 2.0 mL/min |
| 7ei      | Regis ( <i>R,R</i> )-DACH DNB | CH <sub>2</sub> Cl <sub>2</sub> /Hexanes (60:40) | 2.0 mL/min |
| 7ej      | Regis ( <i>R,R</i> )-DACH DNB | CH <sub>2</sub> Cl <sub>2</sub> /Hexanes (60:40) | 2.0 mL/min |
| 7ek      | Regis ( <i>R,R</i> )-DACH DNB | CH <sub>2</sub> Cl <sub>2</sub> /Hexanes (60:40) | 2.0 mL/min |
| 7dl      | Regis ( <i>R,R</i> )-DACH DNB | CH <sub>2</sub> Cl <sub>2</sub> /Hexanes (60:40) | 2.0 mL/min |
| 7dm      | Regis ( <i>R,R</i> )-DACH DNB | CH <sub>2</sub> Cl <sub>2</sub> /Hexanes (60:40) | 2.0 mL/min |
| 7dj      | Regis ( <i>R,R</i> )-DACH DNB | CH <sub>2</sub> Cl <sub>2</sub> /Hexanes (60:40) | 2.0 mL/min |
| 7ch      | Regis ( <i>R,R</i> )-DACH DNB | CH <sub>2</sub> Cl <sub>2</sub> /Hexanes (60:40) | 2.0 mL/min |
| 7cn      | Regis ( <i>R,R</i> )-DACH DNB | CH <sub>2</sub> Cl <sub>2</sub> /Hexanes (60:40) | 2.0 mL/min |
| 7ci      | Regis ( <i>R,R</i> )-DACH DNB | CH <sub>2</sub> Cl <sub>2</sub> /Hexanes (60:40) | 2.0 mL/min |
| 7co      | Regis ( <i>R,R</i> )-DACH DNB | CH <sub>2</sub> Cl <sub>2</sub> /Hexanes (60:40) | 2.0 mL/min |
| 7bh      | Regis ( <i>R,R</i> )-DACH DNB | CH <sub>2</sub> Cl <sub>2</sub> /Hexanes (60:40) | 2.0 mL/min |
| 7bm      | Regis ( <i>R,R</i> )-DACH DNB | CH <sub>2</sub> Cl <sub>2</sub> /Hexanes (60:40) | 2.0 mL/min |
| 7bp      | Regis ( <i>R,R</i> )-DACH DNB | CH <sub>2</sub> Cl <sub>2</sub> /Hexanes (60:40) | 2.0 mL/min |
| 7fa      | Regis ( <i>R,R</i> )-DACH DNB | CH <sub>2</sub> Cl <sub>2</sub> /Hexanes (40:60) | 2.0 mL/min |
| 7fc      | Regis ( <i>R,R</i> )-DACH DNB | CH <sub>2</sub> Cl <sub>2</sub> /Hexanes (60:40) | 2.0 mL/min |
| 7ga      | Regis ( <i>R,R</i> )-DACH DNB | CH <sub>2</sub> Cl <sub>2</sub> /Hexanes (60:40) | 2.0 mL/min |
| 7ap      | Regis ( <i>R,R</i> )-DACH DNB | CH <sub>2</sub> Cl <sub>2</sub> /Hexanes (60:40) | 2.0 mL/min |
| 7al      | Regis ( <i>R,R</i> )-DACH DNB | CH <sub>2</sub> Cl <sub>2</sub> /Hexanes (40:60) | 2.0 mL/min |

## 4.2. Copies of HPLC Traces

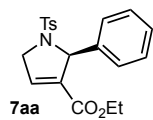

from the reaction catalyzed by

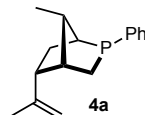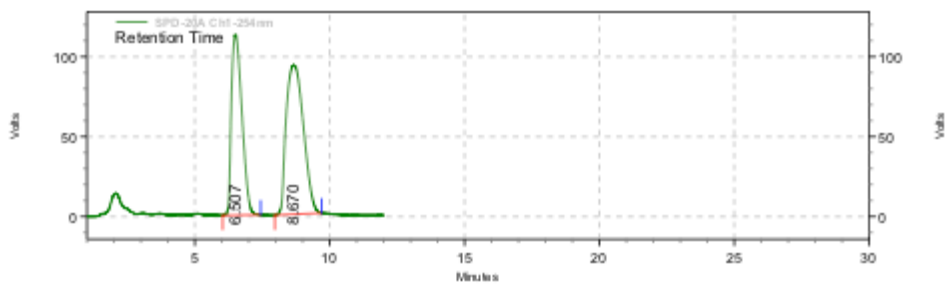

**SPD-20A**  
**Ch1-254nm**  
**Results**

| Retention Time | Area    | Area % | Height | Height % |
|----------------|---------|--------|--------|----------|
| 6.507          | 3069630 | 42.57  | 112957 | 54.76    |
| 8.670          | 4140658 | 57.43  | 93314  | 45.24    |

| Totals | Area    | Area % | Height | Height % |
|--------|---------|--------|--------|----------|
|        | 7210288 | 100.00 | 206271 | 100.00   |

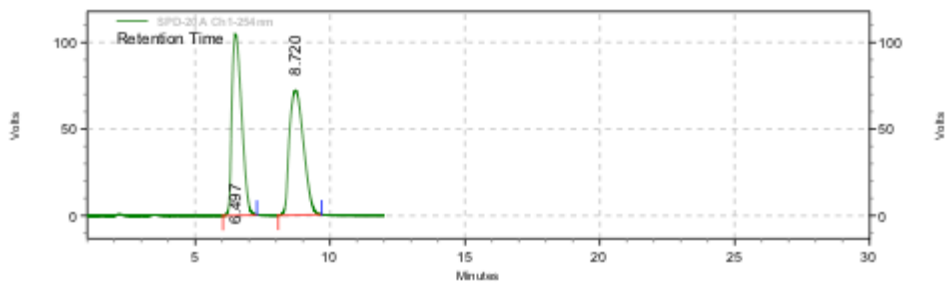

**SPD-20A**  
**Ch1-254nm**  
**Results**

| Retention Time | Area    | Area % | Height | Height % |
|----------------|---------|--------|--------|----------|
| 6.497          | 2618856 | 50.00  | 104665 | 59.26    |
| 8.720          | 2618481 | 50.00  | 71946  | 40.74    |

| Totals | Area    | Area % | Height | Height % |
|--------|---------|--------|--------|----------|
|        | 5237337 | 100.00 | 176611 | 100.00   |

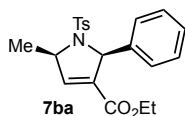

from the reaction catalyzed by

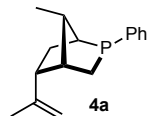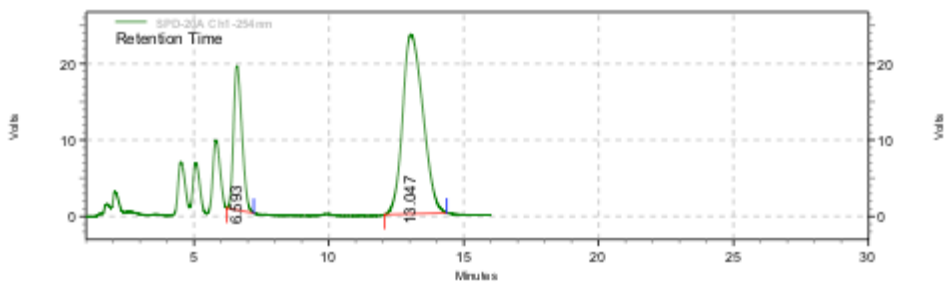

SPD-20A  
Ch1-254nm  
Results

| Retention Time | Area           | Area %        | Height       | Height %      |
|----------------|----------------|---------------|--------------|---------------|
| 6.593          | 408918         | 24.91         | 18887        | 44.60         |
| 13.047         | 1232546        | 75.09         | 23456        | 55.40         |
| <b>Totals</b>  | <b>1641464</b> | <b>100.00</b> | <b>42343</b> | <b>100.00</b> |

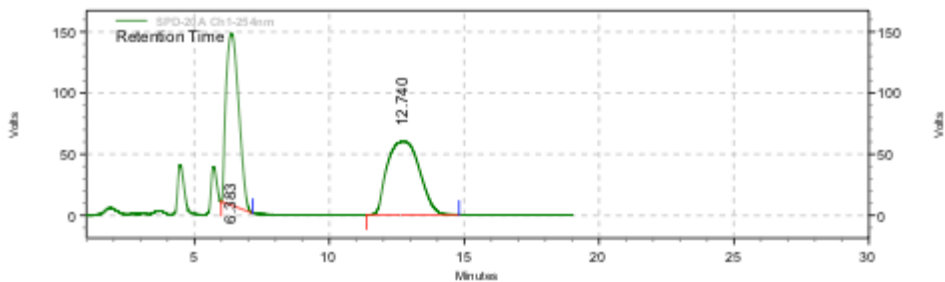

SPD-20A  
Ch1-254nm  
Results

| Retention Time | Area           | Area %        | Height        | Height %      |
|----------------|----------------|---------------|---------------|---------------|
| 6.383          | 4603965        | 47.74         | 140516        | 70.07         |
| 12.740         | 5040441        | 52.26         | 60014         | 29.93         |
| <b>Totals</b>  | <b>9644406</b> | <b>100.00</b> | <b>200530</b> | <b>100.00</b> |

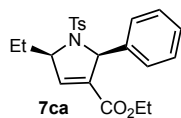

from the reaction catalyzed by

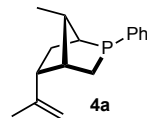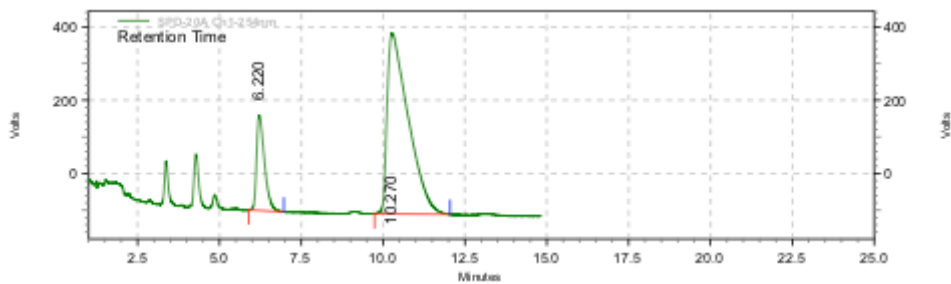

**SPD-20A**  
**Ch1-254nm**  
**Results**

| Retention Time | Area            | Area %        | Height        | Height %      |
|----------------|-----------------|---------------|---------------|---------------|
| 6.220          | 4388368         | 16.54         | 258996        | 34.49         |
| 10.270         | 22140925        | 83.46         | 491916        | 65.51         |
| <b>Totals</b>  | <b>26529293</b> | <b>100.00</b> | <b>750912</b> | <b>100.00</b> |

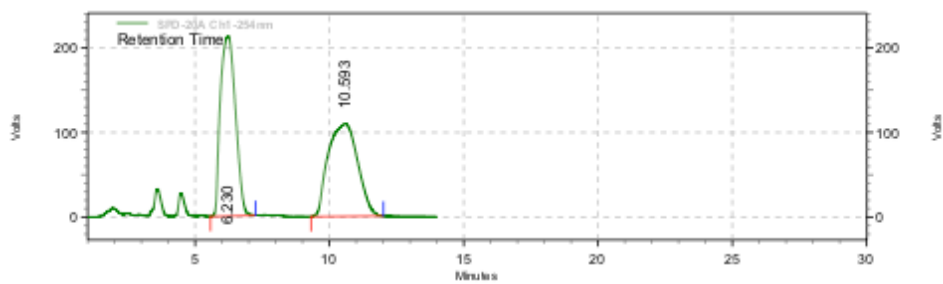

**SPD-20A**  
**Ch1-254nm**  
**Results**

| Retention Time | Area            | Area %        | Height        | Height %      |
|----------------|-----------------|---------------|---------------|---------------|
| 6.230          | 8282768         | 49.86         | 212639        | 66.04         |
| 10.593         | 8328054         | 50.14         | 109370        | 33.96         |
| <b>Totals</b>  | <b>16610822</b> | <b>100.00</b> | <b>322009</b> | <b>100.00</b> |

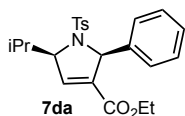

from the reaction catalyzed by

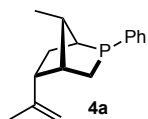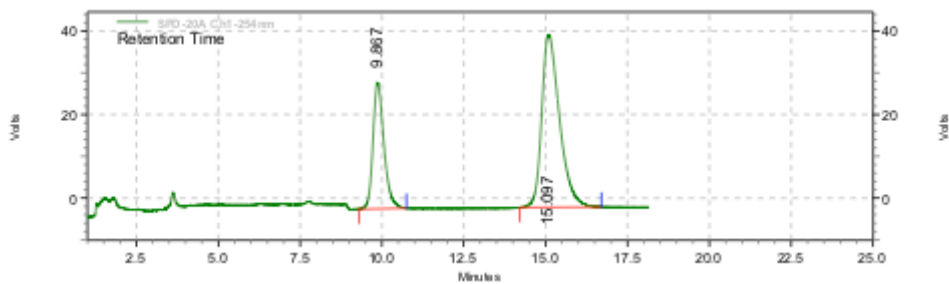

**SPD-20A  
Ch1-254nm  
Results**

| Retention Time | Area           | Area %        | Height       | Height %      |
|----------------|----------------|---------------|--------------|---------------|
| 9.867          | 703582         | 31.04         | 30165        | 42.20         |
| 15.097         | 1563015        | 68.96         | 41323        | 57.80         |
| <b>Totals</b>  | <b>2266597</b> | <b>100.00</b> | <b>71488</b> | <b>100.00</b> |

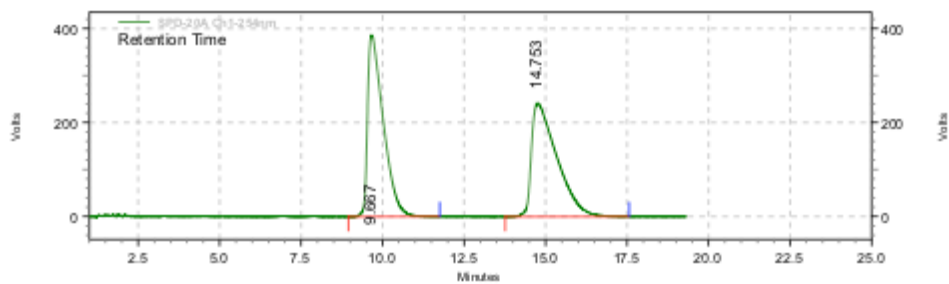

**SPD-20A  
Ch1-254nm  
Results**

| Retention Time | Area            | Area %        | Height        | Height %      |
|----------------|-----------------|---------------|---------------|---------------|
| 9.667          | 12996234        | 49.87         | 387103        | 61.62         |
| 14.753         | 13063679        | 50.13         | 241091        | 38.38         |
| <b>Totals</b>  | <b>26059913</b> | <b>100.00</b> | <b>628194</b> | <b>100.00</b> |

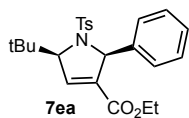

from the reaction catalyzed by

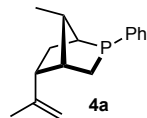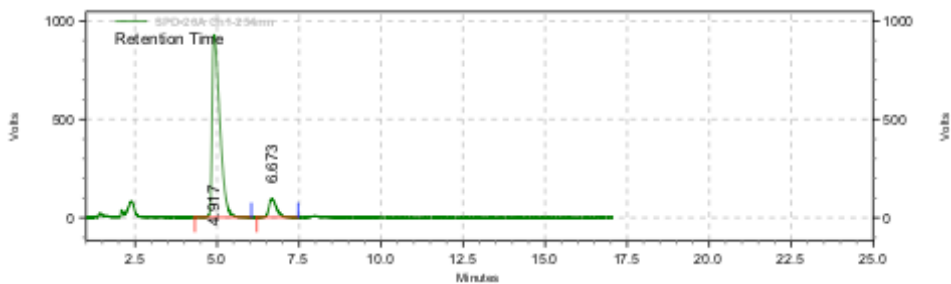

**SPD-20A**  
**Ch1-254nm**  
**Results**

| Retention Time | Area            | Area %        | Height         | Height %      |
|----------------|-----------------|---------------|----------------|---------------|
| 4.917          | 15082326        | 90.76         | 929794         | 90.78         |
| 6.673          | 1535470         | 9.24          | 94395          | 9.22          |
| <b>Totals</b>  | <b>16617796</b> | <b>100.00</b> | <b>1024189</b> | <b>100.00</b> |

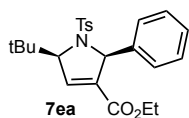

from the reaction catalyzed by

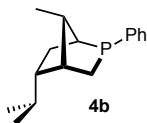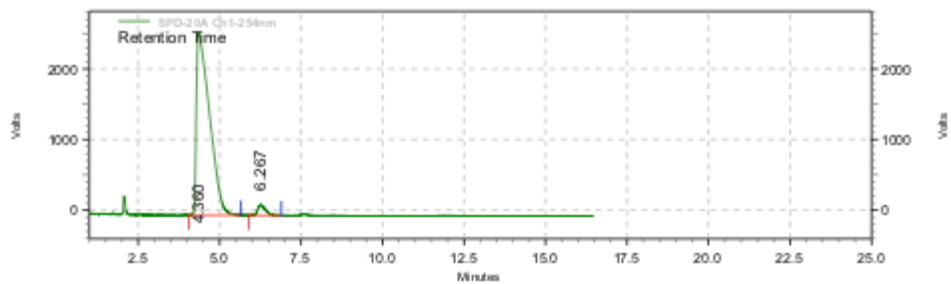

**SPD-20A**  
**Ch1-254nm**  
**Results**

| Retention Time | Area            | Area %        | Height         | Height %      |
|----------------|-----------------|---------------|----------------|---------------|
| 4.360          | 72210140        | 96.66         | 2566107        | 94.62         |
| 6.267          | 2491808         | 3.34          | 146041         | 5.38          |
| <b>Totals</b>  | <b>74701948</b> | <b>100.00</b> | <b>2712148</b> | <b>100.00</b> |



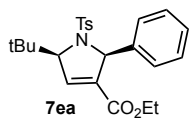

from the reaction catalyzed by

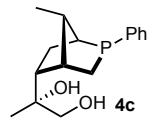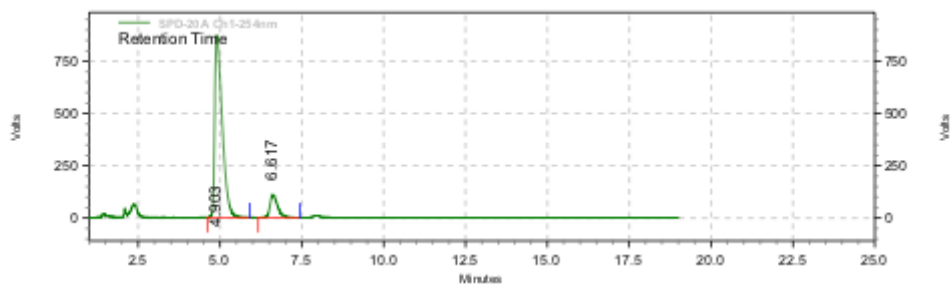

**SPD-20A**  
**Ch1-254nm**  
**Results**

| Retention Time | Area            | Area %        | Height        | Height %      |
|----------------|-----------------|---------------|---------------|---------------|
| 4.903          | 13854871        | 88.60         | 871622        | 88.87         |
| 6.617          | 1782417         | 11.40         | 109194        | 11.13         |
| <b>Totals</b>  | <b>15637288</b> | <b>100.00</b> | <b>980816</b> | <b>100.00</b> |

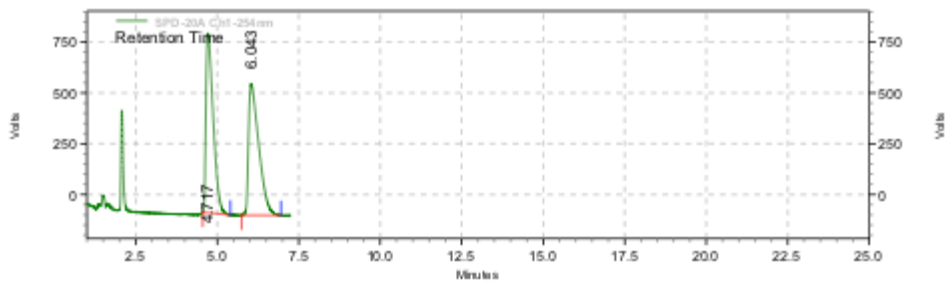

**SPD-20A**  
**Ch1-254nm**  
**Results**

| Retention Time | Area            | Area %        | Height         | Height %      |
|----------------|-----------------|---------------|----------------|---------------|
| 4.717          | 13668933        | 49.13         | 881958         | 57.72         |
| 6.043          | 14151739        | 50.87         | 646067         | 42.28         |
| <b>Totals</b>  | <b>27820672</b> | <b>100.00</b> | <b>1528025</b> | <b>100.00</b> |

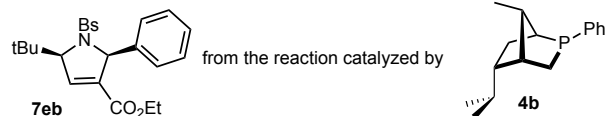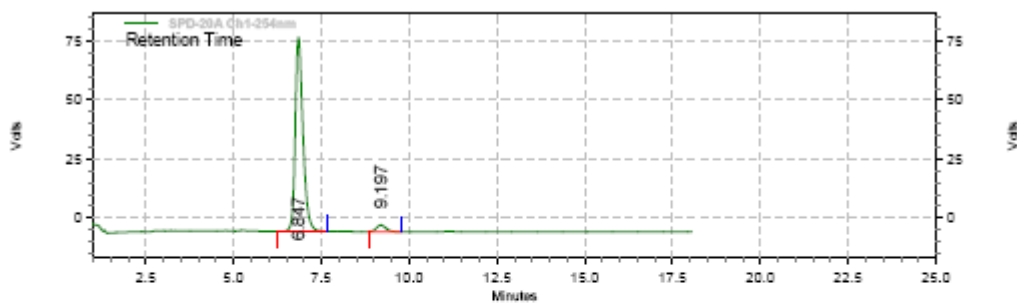

SPD-20A  
Ch1-254nm

Results

| Retention Time | Area    | Area % | Height | Height % |
|----------------|---------|--------|--------|----------|
| 6.847          | 1258725 | 95.93  | 82201  | 96.67    |
| 9.197          | 53352   | 4.07   | 2833   | 3.33     |

| Totals | Area    | Area % | Height | Height % |
|--------|---------|--------|--------|----------|
|        | 1312077 | 100.00 | 85034  | 100.00   |

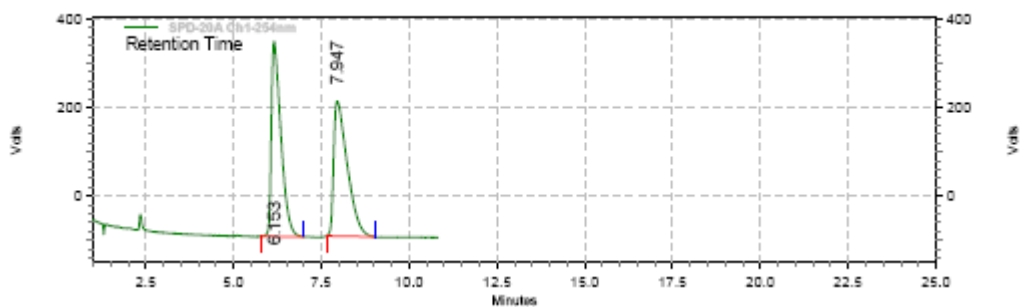

SPD-20A  
Ch1-254nm

Results

| Retention Time | Area    | Area % | Height | Height % |
|----------------|---------|--------|--------|----------|
| 6.153          | 8302511 | 50.21  | 440485 | 59.13    |
| 7.947          | 8232872 | 49.79  | 304454 | 40.87    |

| Totals | Area     | Area % | Height | Height % |
|--------|----------|--------|--------|----------|
|        | 16535383 | 100.00 | 744939 | 100.00   |

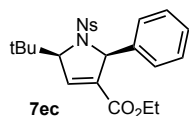

from the reaction catalyzed by

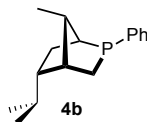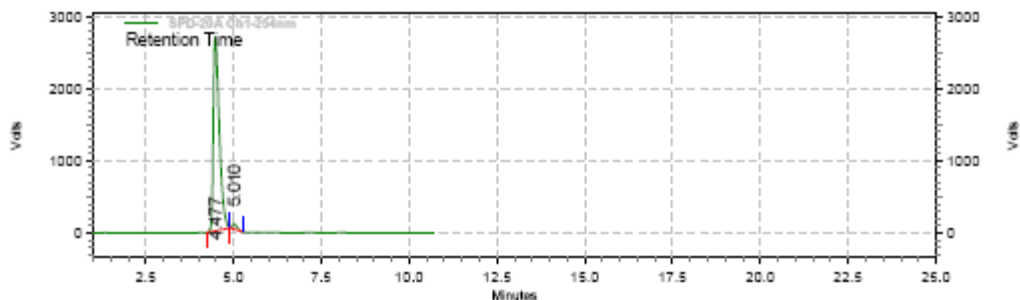

**SPD-20A**  
**Ch1-254nm**  
**Results**

| Retention Time | Area     | Area % | Height  | Height % |
|----------------|----------|--------|---------|----------|
| 4.477          | 31819255 | 97.89  | 2686659 | 97.29    |
| 5.010          | 684526   | 2.11   | 74762   | 2.71     |

| Totals | Area     | Area % | Height  | Height % |
|--------|----------|--------|---------|----------|
|        | 32503781 | 100.00 | 2761421 | 100.00   |

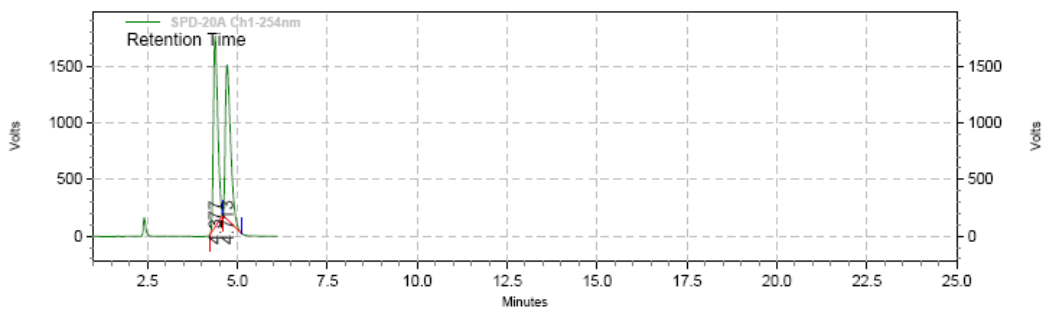

**SPD-20A**  
**Ch1-254nm**  
**Results**

| Retention Time | Area     | Area % | Height  | Height % |
|----------------|----------|--------|---------|----------|
| 4.377          | 14131165 | 50.35  | 1682716 | 55.27    |
| 4.713          | 13935292 | 49.65  | 1361600 | 44.73    |

| Totals | Area     | Area % | Height  | Height % |
|--------|----------|--------|---------|----------|
|        | 28066457 | 100.00 | 3044316 | 100.00   |

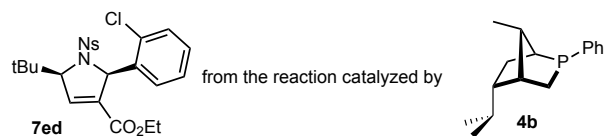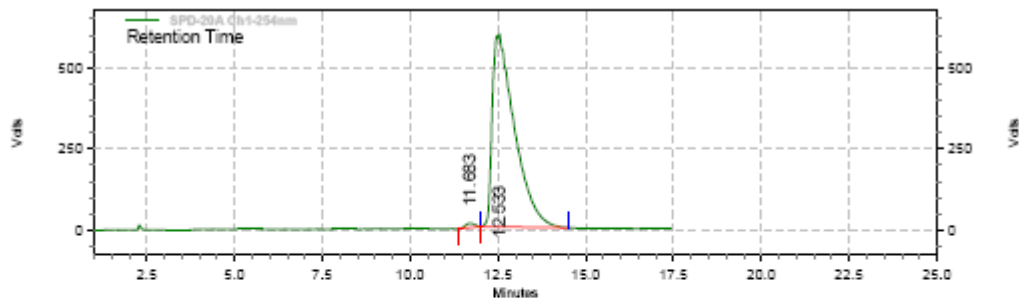

SPD-20A  
 Ch1-254nm  
 Results

| Retention Time | Area     | Area % | Height | Height % |
|----------------|----------|--------|--------|----------|
| 11.683         | 231650   | 0.88   | 13562  | 2.24     |
| 12.533         | 26169097 | 99.12  | 591990 | 97.76    |

| Totals | Area     | Area % | Height | Height % |
|--------|----------|--------|--------|----------|
|        | 26400747 | 100.00 | 605552 | 100.00   |

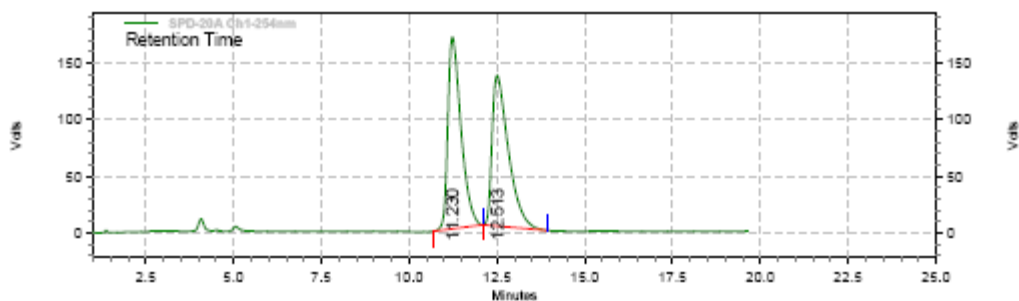

SPD-20A  
 Ch1-254nm  
 Results

| Retention Time | Area    | Area % | Height | Height % |
|----------------|---------|--------|--------|----------|
| 11.230         | 4401168 | 50.50  | 169184 | 55.99    |
| 12.513         | 4313846 | 49.50  | 132991 | 44.01    |

| Totals | Area    | Area % | Height | Height % |
|--------|---------|--------|--------|----------|
|        | 8715014 | 100.00 | 302175 | 100.00   |

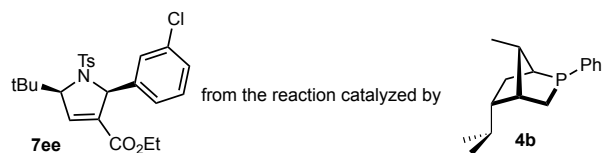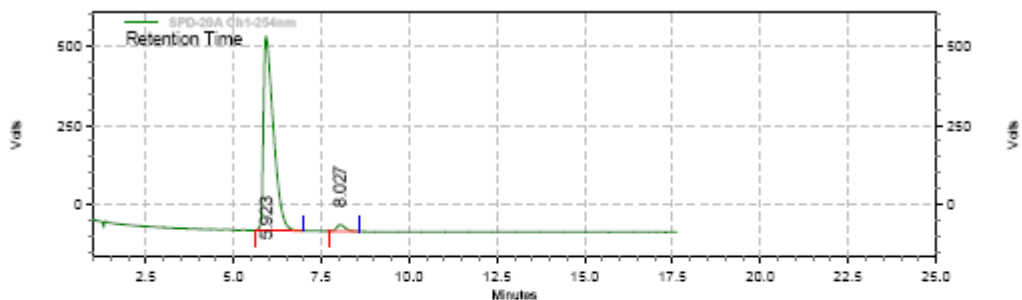

SPD-20A  
Ch1-254nm  
Results

| Retention Time | Area     | Area % | Height | Height % |
|----------------|----------|--------|--------|----------|
| 5.923          | 12029945 | 97.20  | 609447 | 96.86    |
| 8.027          | 345949   | 2.80   | 19756  | 3.14     |
| Totals         |          |        |        |          |
|                | 12375894 | 100.00 | 629203 | 100.00   |

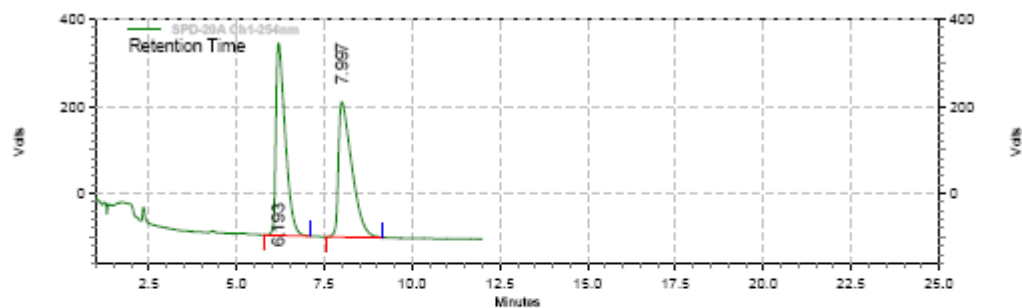

SPD-20A  
Ch1-254nm  
Results

| Retention Time | Area     | Area % | Height | Height % |
|----------------|----------|--------|--------|----------|
| 6.193          | 8197320  | 49.93  | 440782 | 58.69    |
| 7.997          | 8219674  | 50.07  | 310244 | 41.31    |
| Totals         |          |        |        |          |
|                | 16416994 | 100.00 | 751026 | 100.00   |

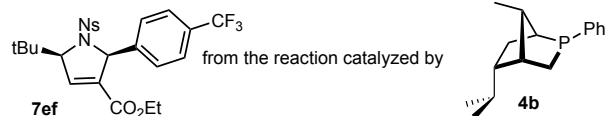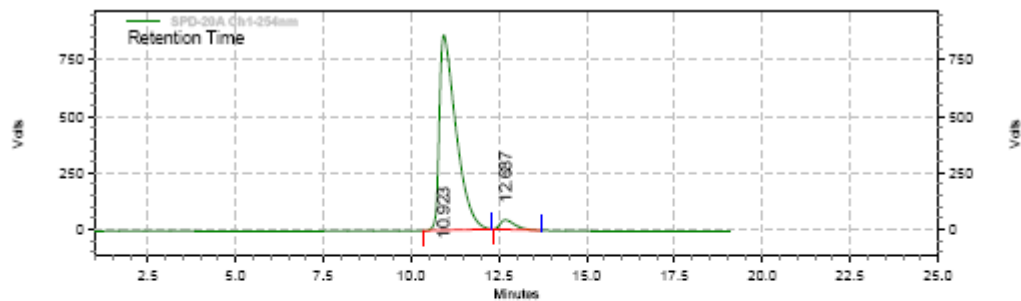

SPD-20A  
Ch1-254nm  
Results

| Retention Time | Area     | Area % | Height | Height % |
|----------------|----------|--------|--------|----------|
| 10.923         | 28610663 | 95.93  | 862511 | 95.34    |
| 12.687         | 1212393  | 4.07   | 42111  | 4.66     |

| Totals |          |        |        |        |
|--------|----------|--------|--------|--------|
|        | 29823056 | 100.00 | 904622 | 100.00 |

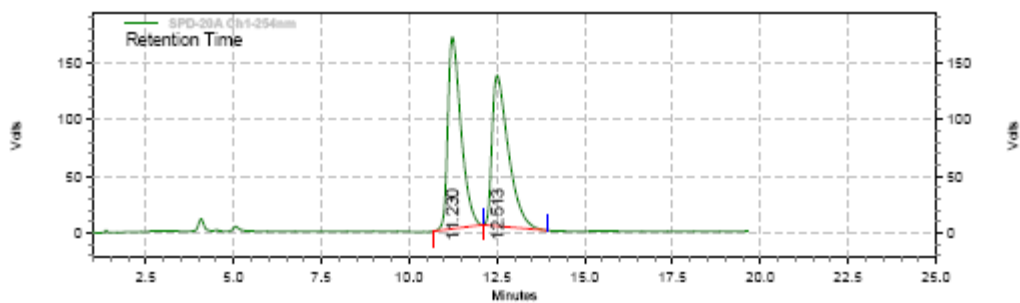

SPD-20A  
Ch1-254nm  
Results

| Retention Time | Area    | Area % | Height | Height % |
|----------------|---------|--------|--------|----------|
| 11.230         | 4401168 | 50.50  | 169184 | 55.99    |
| 12.513         | 4313846 | 49.50  | 132991 | 44.01    |

| Totals |         |        |        |        |
|--------|---------|--------|--------|--------|
|        | 8715014 | 100.00 | 302175 | 100.00 |

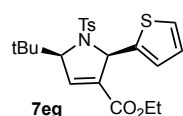

from the reaction catalyzed by

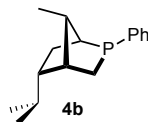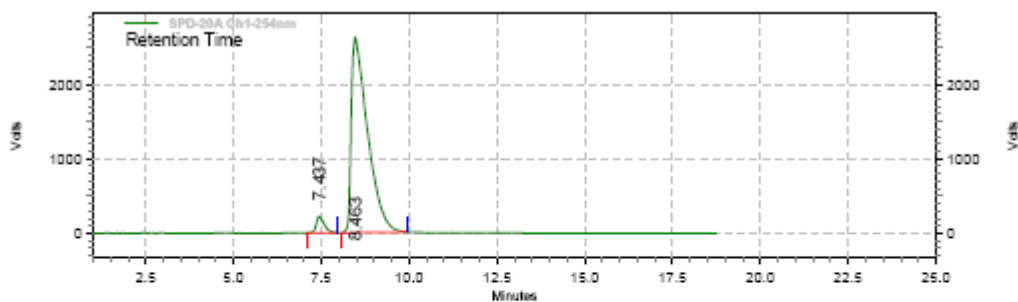

SPD-20A  
Ch1-254nm

Results

| Retention Time | Area     | Area % | Height  | Height % |
|----------------|----------|--------|---------|----------|
| 7.437          | 3539450  | 4.01   | 220894  | 7.78     |
| 8.463          | 84712090 | 95.99  | 2619906 | 92.22    |
| <b>Totals</b>  |          |        |         |          |
|                | 88251540 | 100.00 | 2840800 | 100.00   |

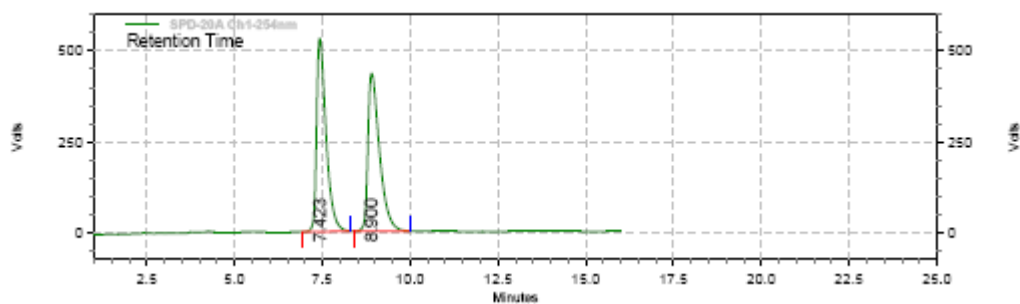

SPD-20A  
Ch1-254nm

Results

| Retention Time | Area     | Area % | Height | Height % |
|----------------|----------|--------|--------|----------|
| 7.423          | 9976100  | 50.06  | 530690 | 55.04    |
| 8.900          | 9951664  | 49.94  | 433445 | 44.96    |
| <b>Totals</b>  |          |        |        |          |
|                | 19927764 | 100.00 | 964135 | 100.00   |

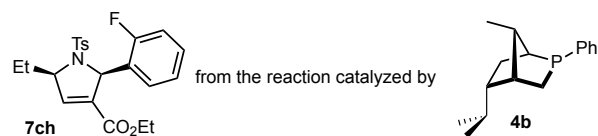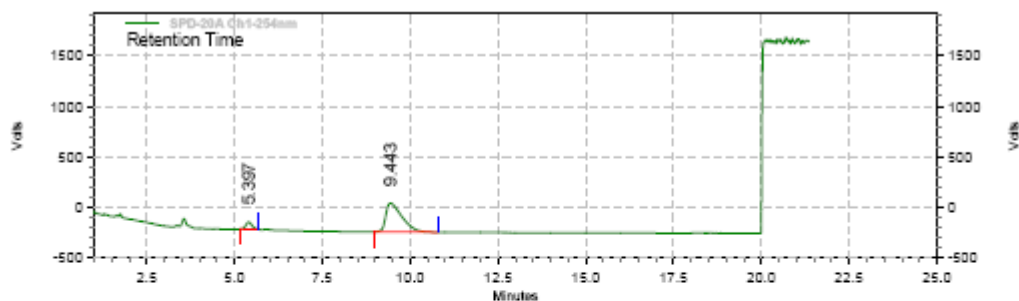

SPD-20A  
Chl-254nm  
Results

| Retention Time | Area    | Area % | Height | Height % |
|----------------|---------|--------|--------|----------|
| 5.397          | 842451  | 8.46   | 70128  | 19.75    |
| 9.443          | 9113483 | 91.54  | 284974 | 80.25    |
| <b>Totals</b>  |         |        |        |          |
|                | 9955934 | 100.00 | 355102 | 100.00   |

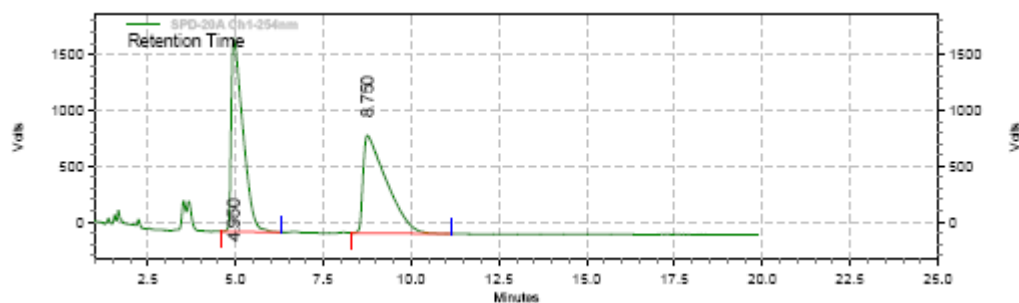

SPD-20A  
Chl-254nm  
Results

| Retention Time | Area     | Area % | Height  | Height % |
|----------------|----------|--------|---------|----------|
| 4.950          | 40093741 | 49.68  | 1729410 | 66.43    |
| 8.750          | 40615019 | 50.32  | 873905  | 33.57    |
| <b>Totals</b>  |          |        |         |          |
|                | 80708760 | 100.00 | 2603315 | 100.00   |



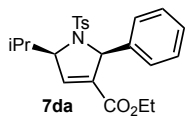

from the reaction catalyzed by

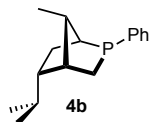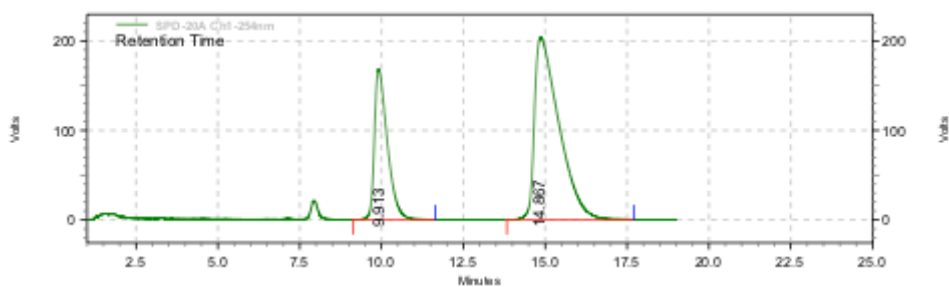

**SPD-20A**  
**Ch1-254nm**  
**Results**

| Retention Time | Area            | Area %        | Height        | Height %      |
|----------------|-----------------|---------------|---------------|---------------|
| 9.913          | 4621420         | 30.34         | 168202        | 45.21         |
| 14.867         | 10608999        | 69.66         | 203832        | 54.79         |
| <b>Totals</b>  | <b>15230419</b> | <b>100.00</b> | <b>372034</b> | <b>100.00</b> |

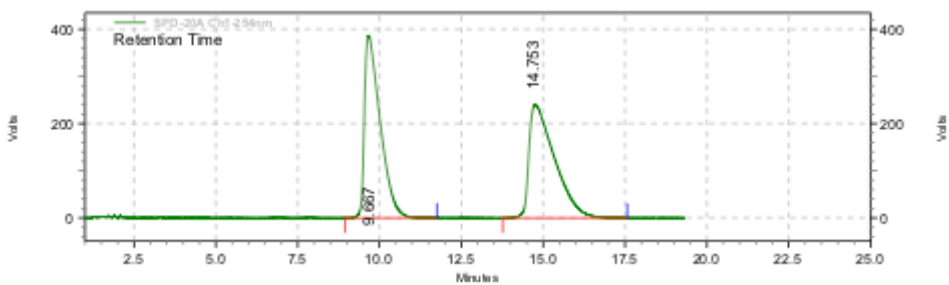

**SPD-20A**  
**Ch1-254nm**  
**Results**

| Retention Time | Area            | Area %        | Height        | Height %      |
|----------------|-----------------|---------------|---------------|---------------|
| 9.667          | 12996234        | 49.87         | 387103        | 61.62         |
| 14.753         | 13063679        | 50.13         | 241091        | 38.38         |
| <b>Totals</b>  | <b>26059913</b> | <b>100.00</b> | <b>628194</b> | <b>100.00</b> |

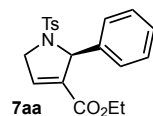

from the reaction catalyzed by

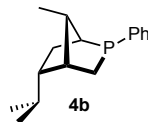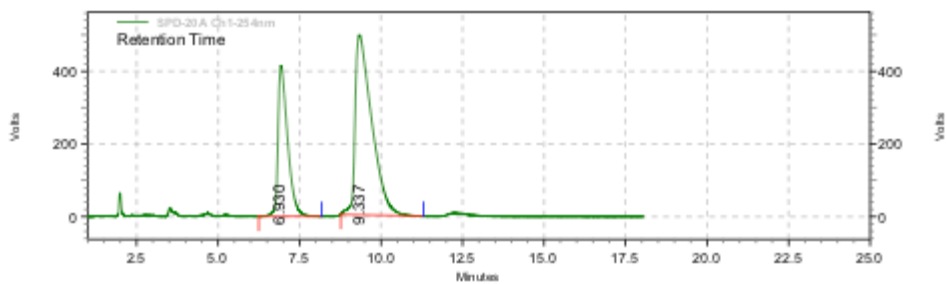

**SPD-20A**  
**Ch1-254nm**  
**Results**

| Retention Time | Area            | Area %        | Height        | Height %      |
|----------------|-----------------|---------------|---------------|---------------|
| 6.930          | 8507418         | 32.59         | 413956        | 45.51         |
| 9.337          | 17598834        | 67.41         | 495606        | 54.49         |
| <b>Totals</b>  | <b>26106252</b> | <b>100.00</b> | <b>909562</b> | <b>100.00</b> |

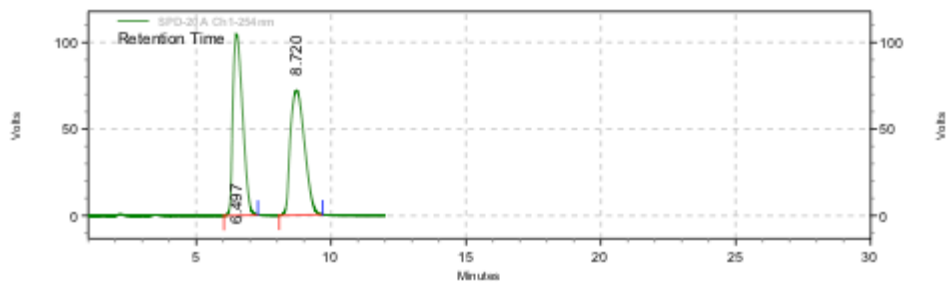

**SPD-20A**  
**Ch1-254nm**  
**Results**

| Retention Time | Area           | Area %        | Height        | Height %      |
|----------------|----------------|---------------|---------------|---------------|
| 6.497          | 2618856        | 50.00         | 104665        | 59.26         |
| 8.720          | 2618481        | 50.00         | 71946         | 40.74         |
| <b>Totals</b>  | <b>5237337</b> | <b>100.00</b> | <b>176611</b> | <b>100.00</b> |

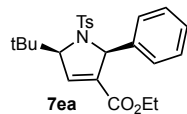

from the reaction catalyzed by

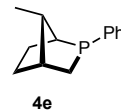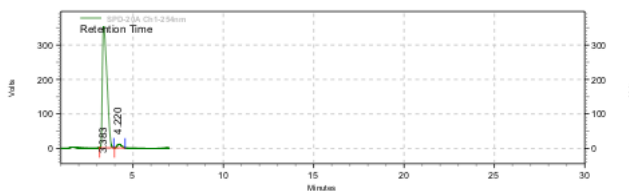

SPD-20A  
Ch1-254nm

Results

| Retention Time | Area    | Area % | Height | Height % |
|----------------|---------|--------|--------|----------|
| 3.383          | 6198912 | 97.05  | 351499 | 97.10    |
| 4.220          | 188749  | 2.95   | 10484  | 2.90     |
| Totals         | 6387661 | 100.00 | 361983 | 100.00   |

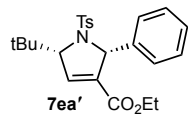

from the reaction catalyzed by

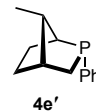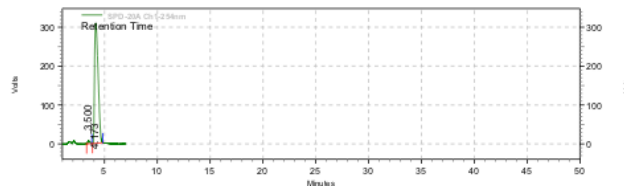

SPD-20A  
Ch1-254nm

Results

| Retention Time | Area    | Area % | Height | Height % |
|----------------|---------|--------|--------|----------|
| 3.500          | 109508  | 1.48   | 7515   | 2.38     |
| 4.173          | 7268655 | 98.52  | 307881 | 97.62    |
| Totals         | 7378163 | 100.00 | 315396 | 100.00   |

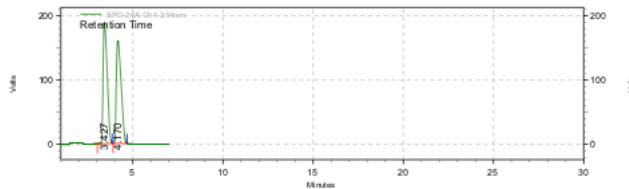

SPD-20A  
Ch1-254nm

Results

| Retention Time | Area    | Area % | Height | Height % |
|----------------|---------|--------|--------|----------|
| 3.427          | 3014446 | 50.09  | 187998 | 54.04    |
| 4.170          | 3003197 | 49.91  | 159891 | 45.96    |
| Totals         | 6017643 | 100.00 | 347889 | 100.00   |

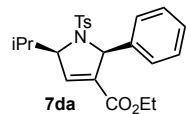

from the reaction catalyzed by

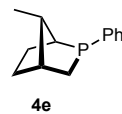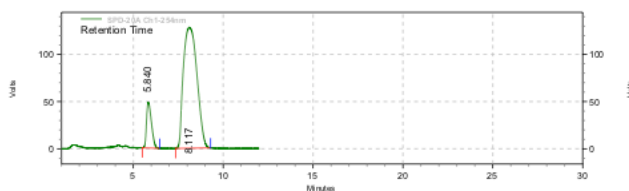

SPD-20A  
Ch1-254nm

Results

| Retention Time | Area    | Area % | Height | Height % |
|----------------|---------|--------|--------|----------|
| 5.840          | 924101  | 12.03  | 48153  | 27.35    |
| 8.117          | 6757407 | 87.97  | 127937 | 72.65    |

| Totals | Area    | Area % | Height | Height % |
|--------|---------|--------|--------|----------|
| Totals | 7681508 | 100.00 | 176090 | 100.00   |

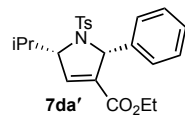

from the reaction catalyzed by

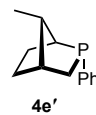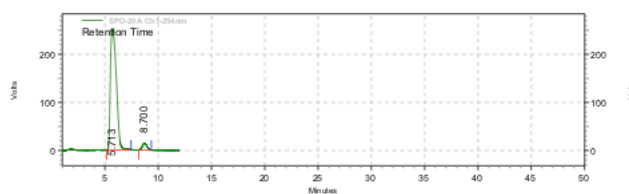

SPD-20A  
Ch1-254nm

Results

| Retention Time | Area    | Area % | Height | Height % |
|----------------|---------|--------|--------|----------|
| 5.713          | 9808649 | 95.94  | 251748 | 94.70    |
| 8.700          | 415199  | 4.06   | 14093  | 5.30     |

| Totals | Area     | Area % | Height | Height % |
|--------|----------|--------|--------|----------|
| Totals | 10223848 | 100.00 | 265841 | 100.00   |

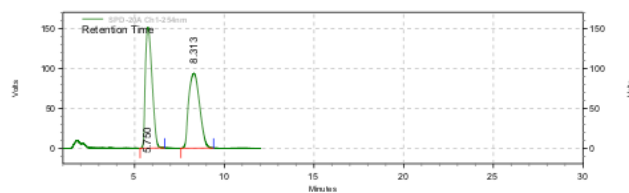

SPD-20A  
Ch1-254nm

Results

| Retention Time | Area    | Area % | Height | Height % |
|----------------|---------|--------|--------|----------|
| 5.750          | 3923692 | 49.88  | 151166 | 61.78    |
| 8.313          | 3942748 | 50.12  | 93536  | 38.22    |

| Totals | Area    | Area % | Height | Height % |
|--------|---------|--------|--------|----------|
| Totals | 7866440 | 100.00 | 244702 | 100.00   |

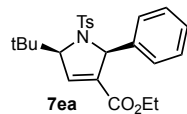

from the reaction catalyzed by

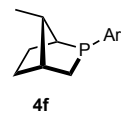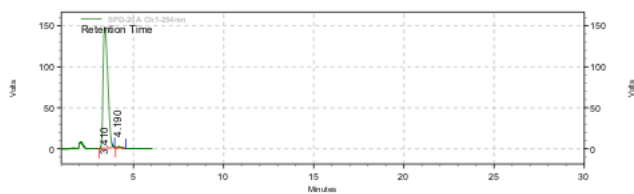

SPD-20A  
Ch1-254nm

Results

| Retention Time | Area    | Area % | Height | Height % |
|----------------|---------|--------|--------|----------|
| 3.410          | 2683633 | 99.20  | 147296 | 99.14    |
| 4.190          | 21684   | 0.80   | 1272   | 0.86     |

| Totals | Area    | Area % | Height | Height % |
|--------|---------|--------|--------|----------|
|        | 2705317 | 100.00 | 148568 | 100.00   |

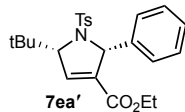

from the reaction catalyzed by

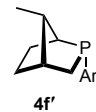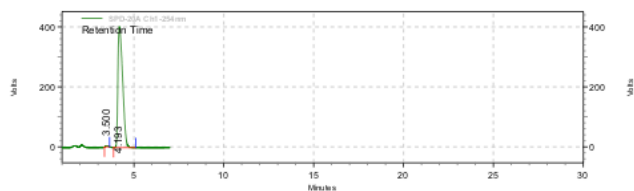

SPD-20A  
Ch1-254nm

Results

| Retention Time | Area    | Area % | Height | Height % |
|----------------|---------|--------|--------|----------|
| 3.500          | 38664   | 0.52   | 3563   | 0.88     |
| 4.193          | 7382990 | 99.48  | 403033 | 99.12    |

| Totals | Area    | Area % | Height | Height % |
|--------|---------|--------|--------|----------|
|        | 7421654 | 100.00 | 406596 | 100.00   |

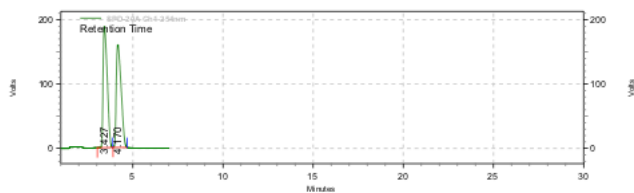

SPD-20A  
Ch1-254nm

Results

| Retention Time | Area    | Area % | Height | Height % |
|----------------|---------|--------|--------|----------|
| 3.427          | 3014446 | 50.09  | 187998 | 54.04    |
| 4.170          | 3003197 | 49.91  | 159891 | 45.96    |

| Totals | Area    | Area % | Height | Height % |
|--------|---------|--------|--------|----------|
|        | 6017643 | 100.00 | 347889 | 100.00   |

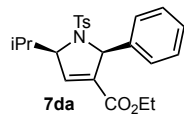

from the reaction catalyzed by

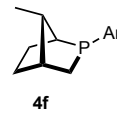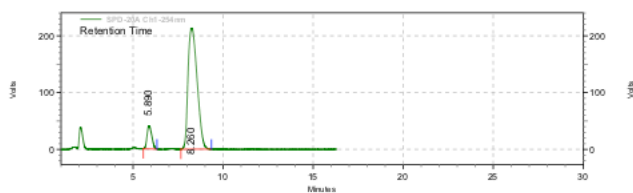

SPD-20A  
Ch1-254nm

Results

| Retention Time | Area    | Area % | Height | Height % |
|----------------|---------|--------|--------|----------|
| 5.890          | 744831  | 9.03   | 40403  | 15.92    |
| 8.260          | 7501981 | 90.97  | 213424 | 84.08    |
| Totals         | 8246812 | 100.00 | 253827 | 100.00   |

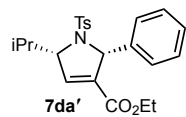

from the reaction catalyzed by

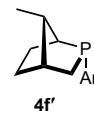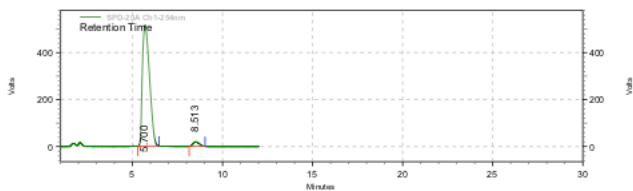

SPD-20A  
Ch1-254nm

Results

| Retention Time | Area     | Area % | Height | Height % |
|----------------|----------|--------|--------|----------|
| 5.700          | 14227978 | 96.87  | 514492 | 96.42    |
| 8.513          | 459037   | 3.13   | 19110  | 3.58     |
| Totals         | 14687015 | 100.00 | 533602 | 100.00   |

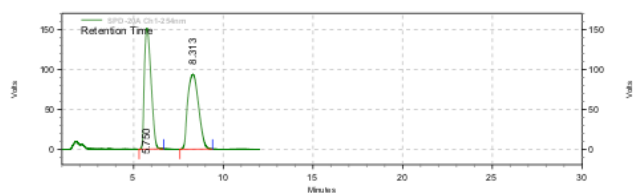

SPD-20A  
Ch1-254nm

Results

| Retention Time | Area    | Area % | Height | Height % |
|----------------|---------|--------|--------|----------|
| 5.750          | 3923692 | 49.88  | 151166 | 61.78    |
| 8.313          | 3942748 | 50.12  | 93536  | 38.22    |
| Totals         | 7866440 | 100.00 | 244702 | 100.00   |

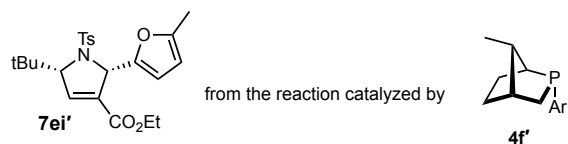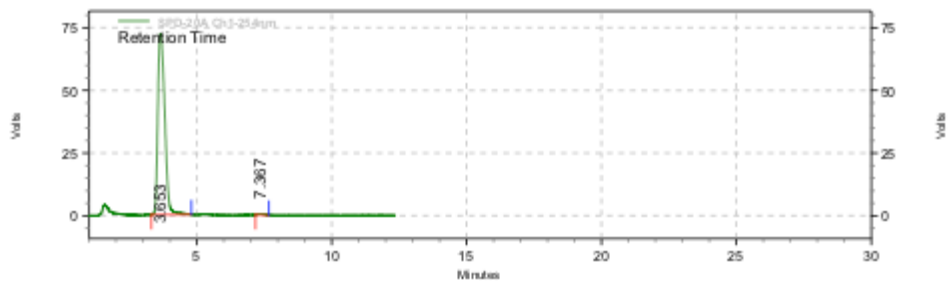

**SPD-20A**  
**Ch1-254nm**  
**Results**

| Retention Time | Area           | Area %        | Height       | Height %      |
|----------------|----------------|---------------|--------------|---------------|
| 3.653          | 1293151        | 99.42         | 72141        | 99.39         |
| 7.367          | 7486           | 0.58          | 446          | 0.61          |
| <b>Totals</b>  | <b>1300637</b> | <b>100.00</b> | <b>72587</b> | <b>100.00</b> |

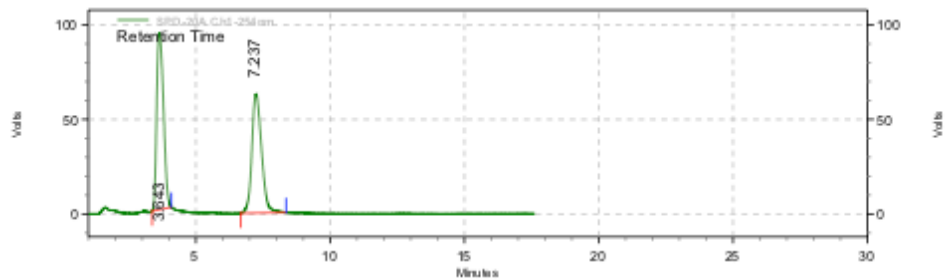

**SPD-20A**  
**Ch1-254nm**  
**Results**

| Retention Time | Area           | Area %        | Height        | Height %      |
|----------------|----------------|---------------|---------------|---------------|
| 3.643          | 1654361        | 51.15         | 93573         | 59.68         |
| 7.237          | 1580197        | 48.85         | 63219         | 40.32         |
| <b>Totals</b>  | <b>3234558</b> | <b>100.00</b> | <b>156792</b> | <b>100.00</b> |

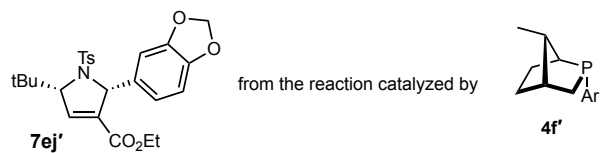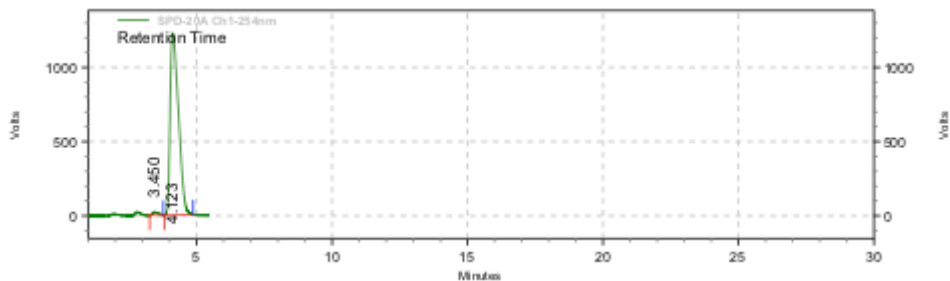

**SPD-20A**  
**Ch1-254nm**  
**Results**

| Retention Time | Area            | Area %        | Height         | Height %      |
|----------------|-----------------|---------------|----------------|---------------|
| 3.450          | 327082          | 1.23          | 19989          | 1.61          |
| 4.123          | 26269502        | 98.77         | 1224846        | 98.39         |
| <b>Totals</b>  | <b>26596584</b> | <b>100.00</b> | <b>1244835</b> | <b>100.00</b> |

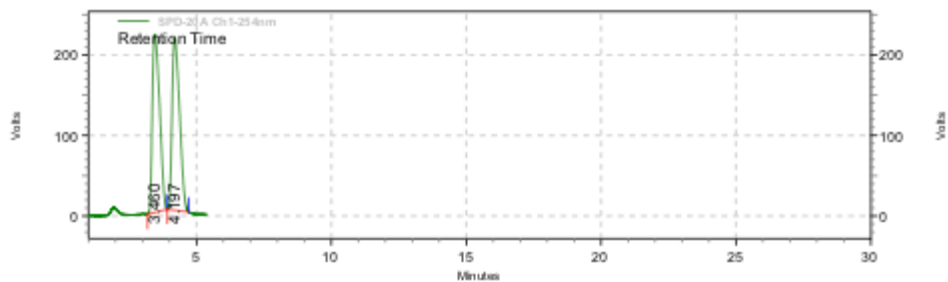

**SPD-20A**  
**Ch1-254nm**  
**Results**

| Retention Time | Area           | Area %        | Height        | Height %      |
|----------------|----------------|---------------|---------------|---------------|
| 3.460          | 4154710        | 50.10         | 221338        | 50.85         |
| 4.197          | 4137637        | 49.90         | 213901        | 49.15         |
| <b>Totals</b>  | <b>8292347</b> | <b>100.00</b> | <b>435239</b> | <b>100.00</b> |



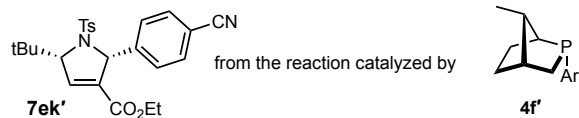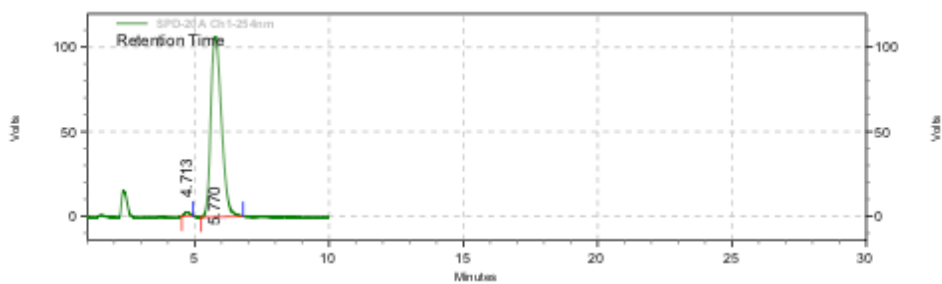

**SPD-20A  
Ch1-254nm  
Results**

| Retention Time | Area           | Area %        | Height        | Height %      |
|----------------|----------------|---------------|---------------|---------------|
| 4.713          | 33065          | 1.11          | 2234          | 2.05          |
| 5.770          | 2938637        | 98.89         | 106849        | 97.95         |
| <b>Totals</b>  | <b>2971702</b> | <b>100.00</b> | <b>109083</b> | <b>100.00</b> |

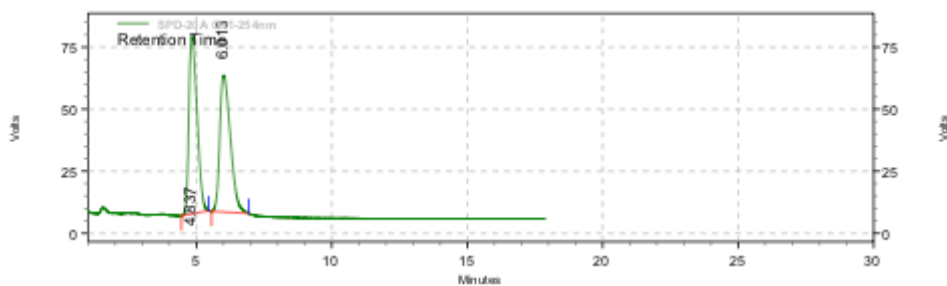

**SPD-20A  
Ch1-254nm  
Results**

| Retention Time | Area           | Area %        | Height        | Height %      |
|----------------|----------------|---------------|---------------|---------------|
| 4.837          | 1505679        | 49.99         | 71535         | 56.43         |
| 6.013          | 1506561        | 50.01         | 55243         | 43.57         |
| <b>Totals</b>  | <b>3012240</b> | <b>100.00</b> | <b>126778</b> | <b>100.00</b> |

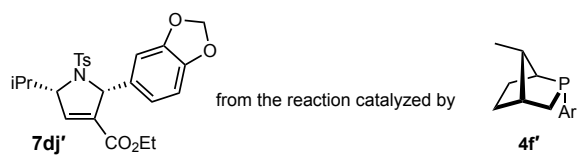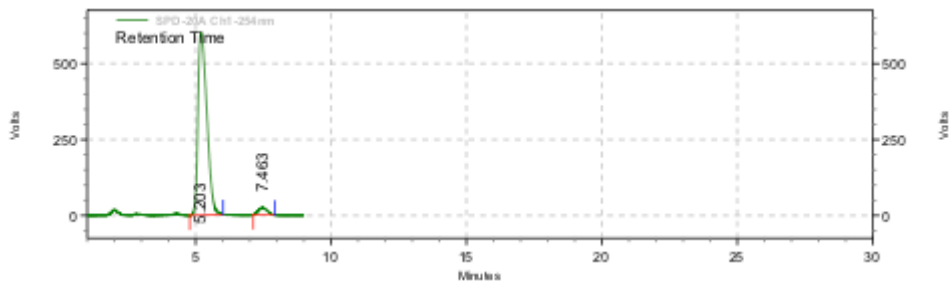

**SPD-20A  
Ch1-254nm  
Results**

| Retention Time | Area            | Area %        | Height        | Height %      |
|----------------|-----------------|---------------|---------------|---------------|
| 5.203          | 13698617        | 96.29         | 599826        | 96.19         |
| 7.463          | 528220          | 3.71          | 23753         | 3.81          |
| <b>Totals</b>  | <b>14226837</b> | <b>100.00</b> | <b>623579</b> | <b>100.00</b> |

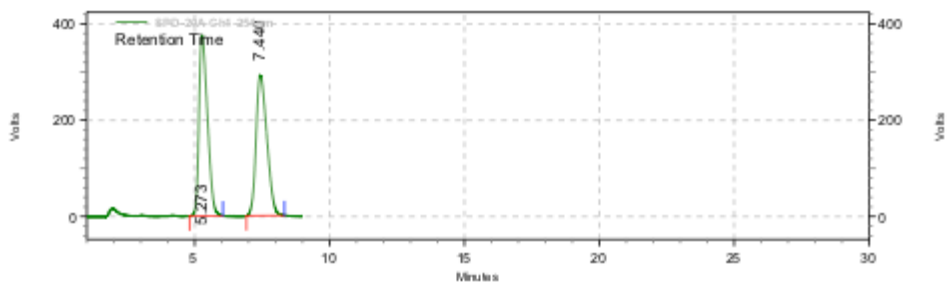

**SPD-20A  
Ch1-254nm  
Results**

| Retention Time | Area            | Area %        | Height        | Height %      |
|----------------|-----------------|---------------|---------------|---------------|
| 5.273          | 8205105         | 50.11         | 376109        | 56.31         |
| 7.440          | 8170433         | 49.89         | 291776        | 43.69         |
| <b>Totals</b>  | <b>16375538</b> | <b>100.00</b> | <b>667885</b> | <b>100.00</b> |

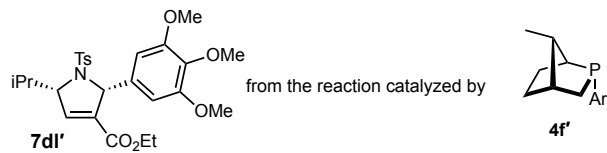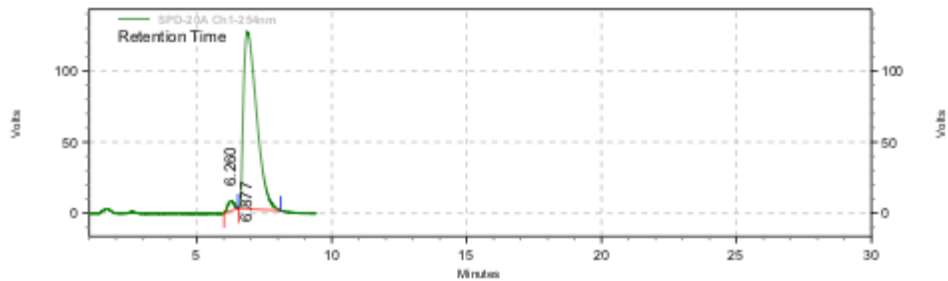

**SPD-20A**  
**Ch1-254nm**  
**Results**

| Retention Time | Area           | Area %        | Height        | Height %      |
|----------------|----------------|---------------|---------------|---------------|
| 6.260          | 111244         | 2.58          | 6795          | 5.18          |
| 6.877          | 4208417        | 97.42         | 124288        | 94.82         |
| <b>Totals</b>  | <b>4319661</b> | <b>100.00</b> | <b>131083</b> | <b>100.00</b> |

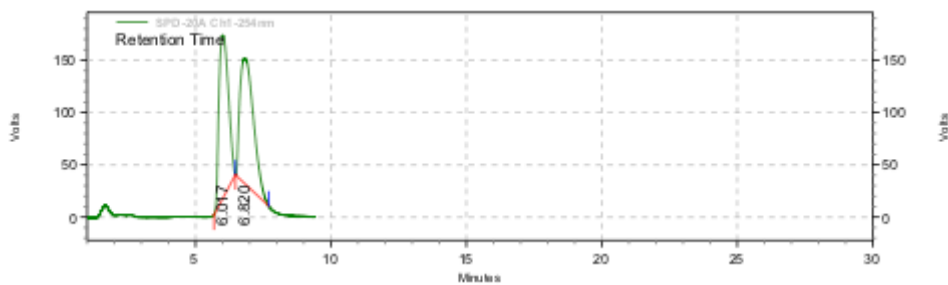

**SPD-20A**  
**Ch1-254nm**  
**Results**

| Retention Time | Area           | Area %        | Height        | Height %      |
|----------------|----------------|---------------|---------------|---------------|
| 6.017          | 3787159        | 47.21         | 155848        | 56.53         |
| 6.820          | 4233973        | 52.79         | 119858        | 43.47         |
| <b>Totals</b>  | <b>8021132</b> | <b>100.00</b> | <b>275706</b> | <b>100.00</b> |

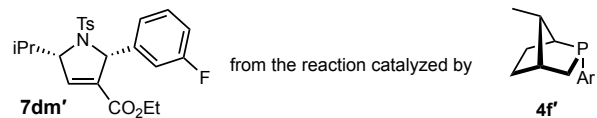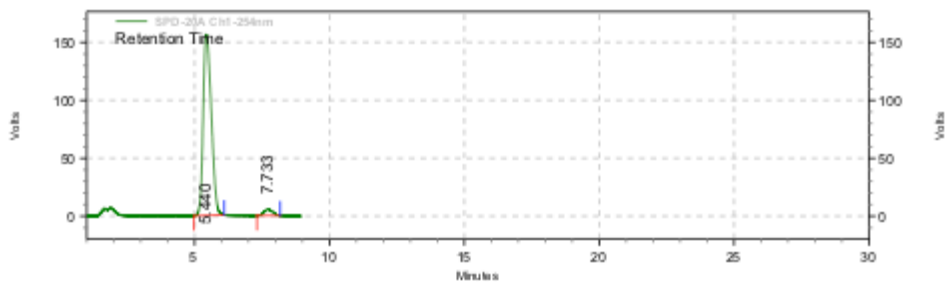

**SPD-20A**  
**Ch1-254nm**  
**Results**

| Retention Time | Area    | Area % | Height | Height % |
|----------------|---------|--------|--------|----------|
| 5.440          | 3290787 | 96.31  | 156474 | 96.57    |
| 7.733          | 125924  | 3.69   | 5554   | 3.43     |

| Totals | Area    | Area % | Height | Height % |
|--------|---------|--------|--------|----------|
|        | 3416711 | 100.00 | 162028 | 100.00   |

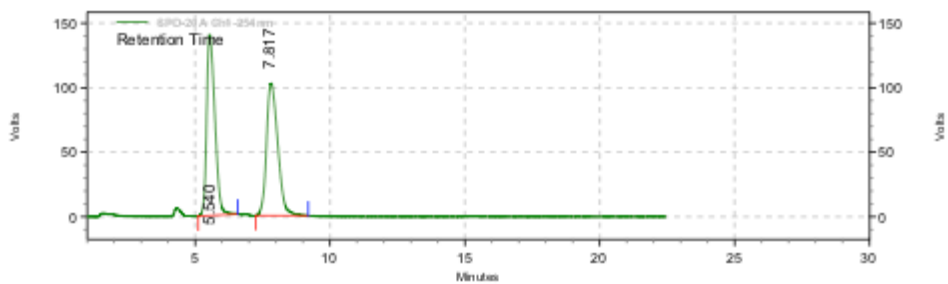

**SPD-20A**  
**Ch1-254nm**  
**Results**

| Retention Time | Area    | Area % | Height | Height % |
|----------------|---------|--------|--------|----------|
| 5.540          | 2970920 | 49.79  | 140039 | 57.70    |
| 7.817          | 2996141 | 50.21  | 102683 | 42.30    |

| Totals | Area    | Area % | Height | Height % |
|--------|---------|--------|--------|----------|
|        | 5967061 | 100.00 | 242722 | 100.00   |

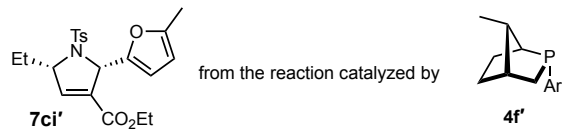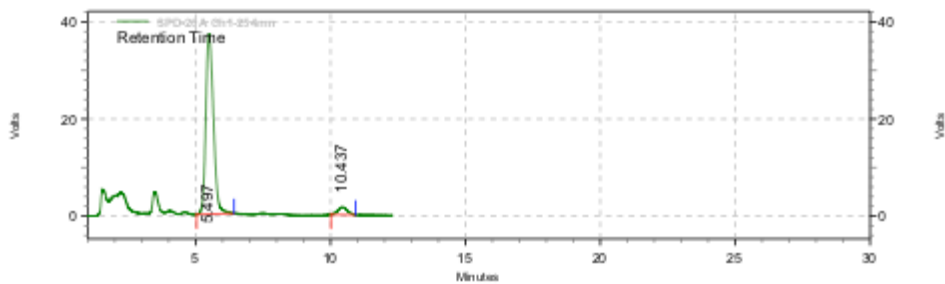

**SPD-20A**  
**Ch1-254nm**  
**Results**

| Retention Time | Area          | Area %        | Height       | Height %      |
|----------------|---------------|---------------|--------------|---------------|
| 5.497          | 730756        | 95.04         | 37086        | 96.08         |
| 10.437         | 38125         | 4.96          | 1515         | 3.92          |
| <b>Totals</b>  | <b>768881</b> | <b>100.00</b> | <b>38601</b> | <b>100.00</b> |

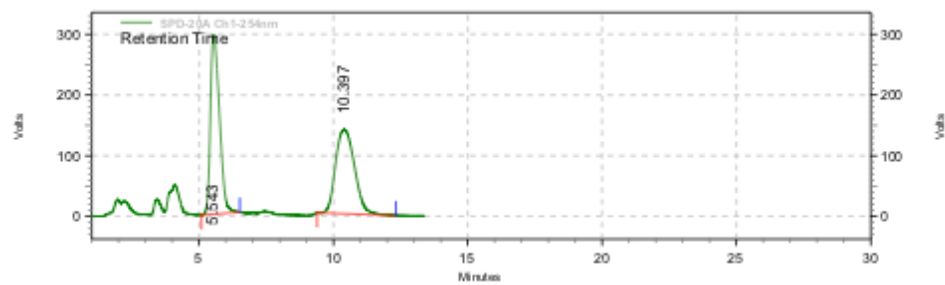

**SPD-20A**  
**Ch1-254nm**  
**Results**

| Retention Time | Area            | Area %        | Height        | Height %      |
|----------------|-----------------|---------------|---------------|---------------|
| 5.543          | 6943028         | 50.54         | 294663        | 67.93         |
| 10.397         | 6795940         | 49.46         | 139140        | 32.07         |
| <b>Totals</b>  | <b>13738968</b> | <b>100.00</b> | <b>433803</b> | <b>100.00</b> |

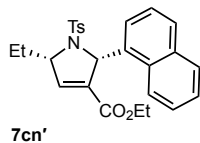

from the reaction catalyzed by

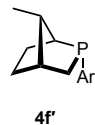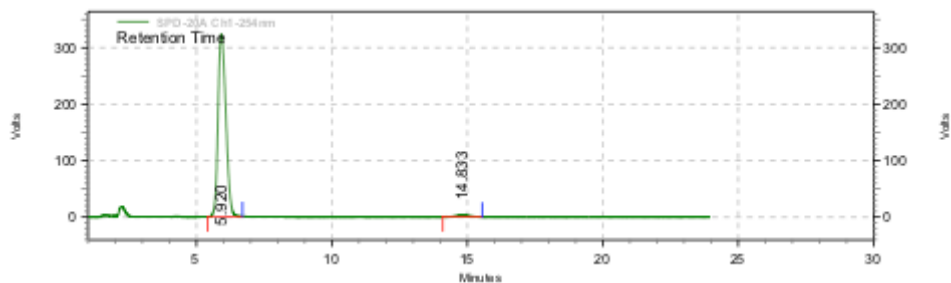

**SPD-20A**  
**Ch1-254nm**  
**Results**

| Retention Time | Area           | Area %        | Height        | Height %      |
|----------------|----------------|---------------|---------------|---------------|
| 5.920          | 6516266        | 98.47         | 322970        | 99.16         |
| 14.833         | 101442         | 1.53          | 2723          | 0.84          |
| <b>Totals</b>  | <b>6617708</b> | <b>100.00</b> | <b>325693</b> | <b>100.00</b> |

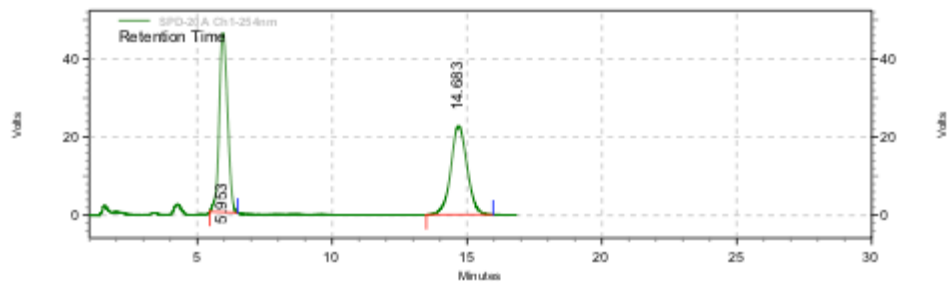

**SPD-20A**  
**Ch1-254nm**  
**Results**

| Retention Time | Area           | Area %        | Height       | Height %      |
|----------------|----------------|---------------|--------------|---------------|
| 5.953          | 983983         | 50.74         | 45761        | 66.82         |
| 14.683         | 955173         | 49.26         | 22728        | 33.18         |
| <b>Totals</b>  | <b>1939156</b> | <b>100.00</b> | <b>68489</b> | <b>100.00</b> |

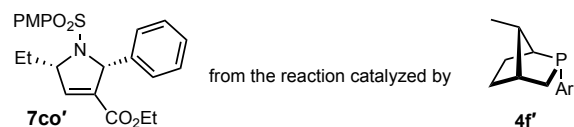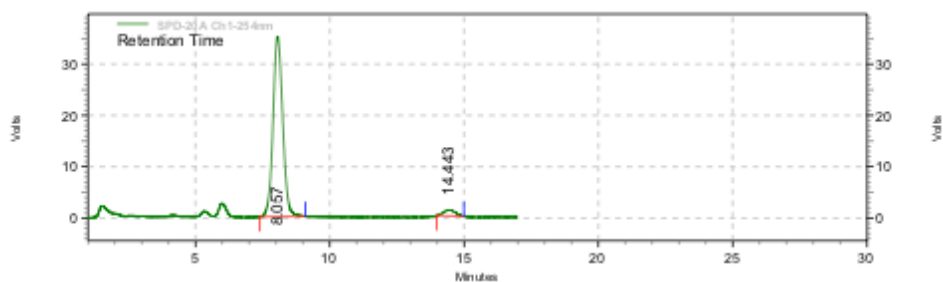

SPD-20A  
Ch1-254nm  
Results

| Retention Time | Area          | Area %        | Height       | Height %      |
|----------------|---------------|---------------|--------------|---------------|
| 8.057          | 881487        | 96.02         | 35060        | 96.80         |
| 14.443         | 36492         | 3.98          | 1158         | 3.20          |
| <b>Totals</b>  | <b>917979</b> | <b>100.00</b> | <b>36218</b> | <b>100.00</b> |

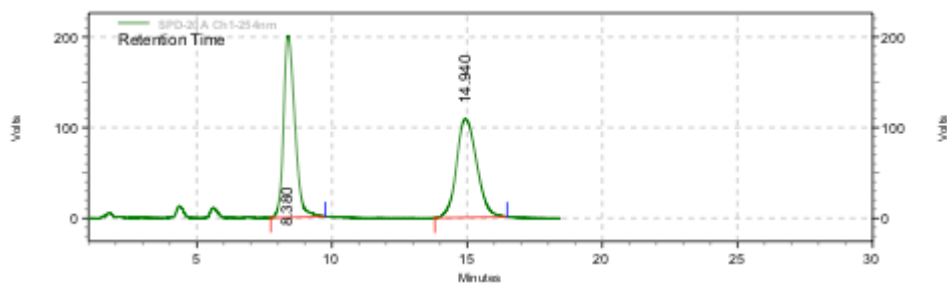

SPD-20A  
Ch1-254nm  
Results

| Retention Time | Area            | Area %        | Height        | Height %      |
|----------------|-----------------|---------------|---------------|---------------|
| 8.380          | 5801634         | 50.61         | 200224        | 64.73         |
| 14.940         | 5661510         | 49.39         | 109082        | 35.27         |
| <b>Totals</b>  | <b>11463144</b> | <b>100.00</b> | <b>309306</b> | <b>100.00</b> |

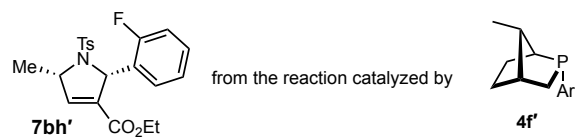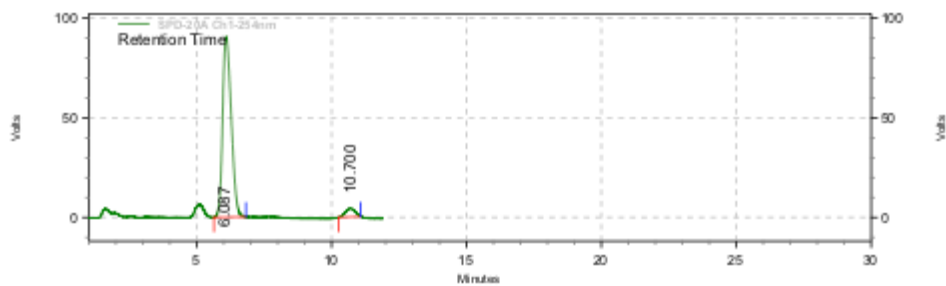

SPD-20A  
Ch1-254nm  
Results

| Retention Time | Area    | Area % | Height | Height % |
|----------------|---------|--------|--------|----------|
| 6.087          | 2011991 | 94.91  | 90648  | 95.47    |
| 10.700         | 107838  | 5.09   | 4297   | 4.53     |

| Totals | Area    | Area % | Height | Height % |
|--------|---------|--------|--------|----------|
|        | 2119829 | 100.00 | 94945  | 100.00   |

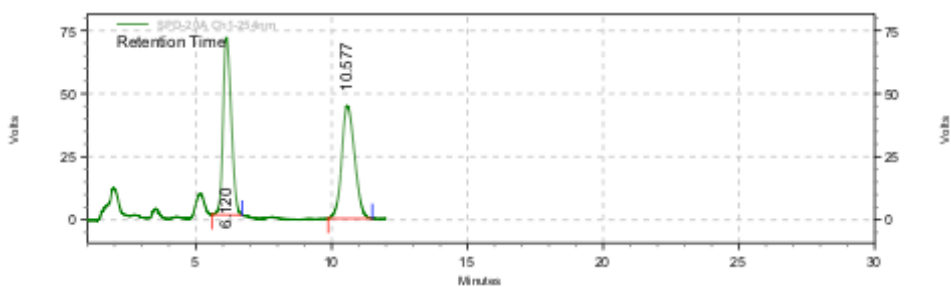

SPD-20A  
Ch1-254nm  
Results

| Retention Time | Area    | Area % | Height | Height % |
|----------------|---------|--------|--------|----------|
| 6.120          | 1473238 | 49.96  | 70461  | 61.22    |
| 10.577         | 1475491 | 50.04  | 44638  | 38.78    |

| Totals | Area    | Area % | Height | Height % |
|--------|---------|--------|--------|----------|
|        | 2948729 | 100.00 | 115099 | 100.00   |



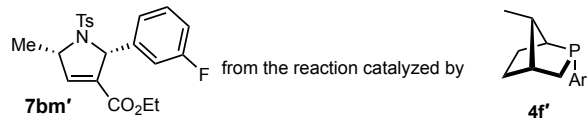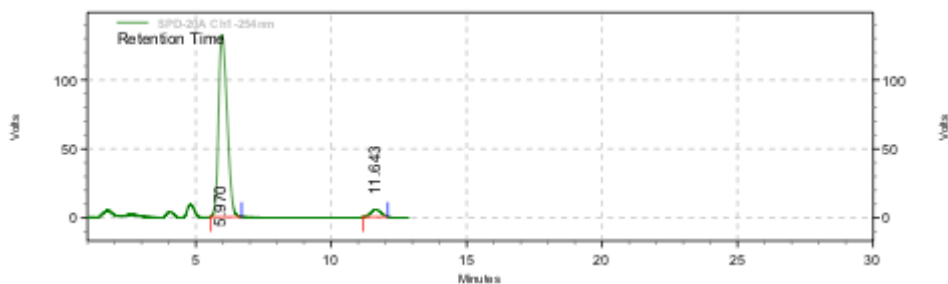

**SPD-20A**  
**Ch1-254nm**  
**Results**

| Retention Time | Area           | Area %        | Height        | Height %      |
|----------------|----------------|---------------|---------------|---------------|
| 5.970          | 2888601        | 95.29         | 131580        | 96.14         |
| 11.643         | 142883         | 4.71          | 5287          | 3.86          |
| <b>Totals</b>  | <b>3031484</b> | <b>100.00</b> | <b>136867</b> | <b>100.00</b> |

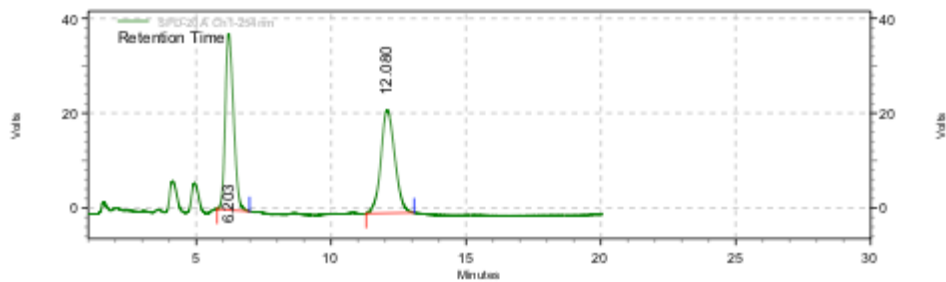

**SPD-20A**  
**Ch1-254nm**  
**Results**

| Retention Time | Area           | Area %        | Height       | Height %      |
|----------------|----------------|---------------|--------------|---------------|
| 6.203          | 791048         | 50.22         | 37145        | 63.02         |
| 12.080         | 783962         | 49.78         | 21796        | 36.98         |
| <b>Totals</b>  | <b>1575010</b> | <b>100.00</b> | <b>58941</b> | <b>100.00</b> |

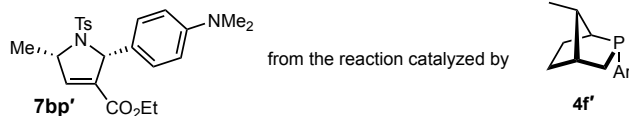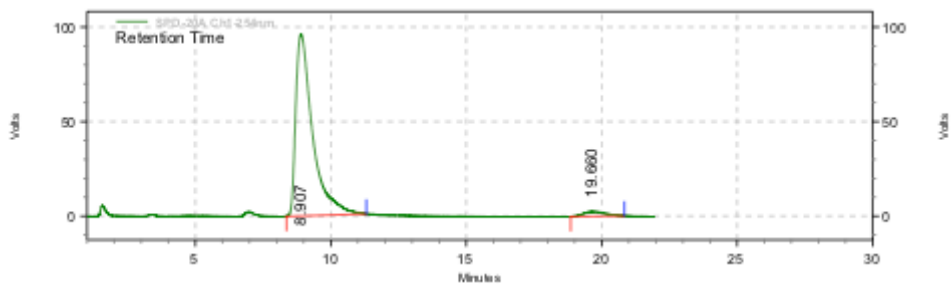

**SPD-20A**  
**Ch1-254nm**  
**Results**

| Retention Time | Area           | Area %        | Height       | Height %      |
|----------------|----------------|---------------|--------------|---------------|
| 8.907          | 4170662        | 96.82         | 96008        | 97.51         |
| 19.660         | 137008         | 3.18          | 2451         | 2.49          |
| <b>Totals</b>  | <b>4307670</b> | <b>100.00</b> | <b>98459</b> | <b>100.00</b> |

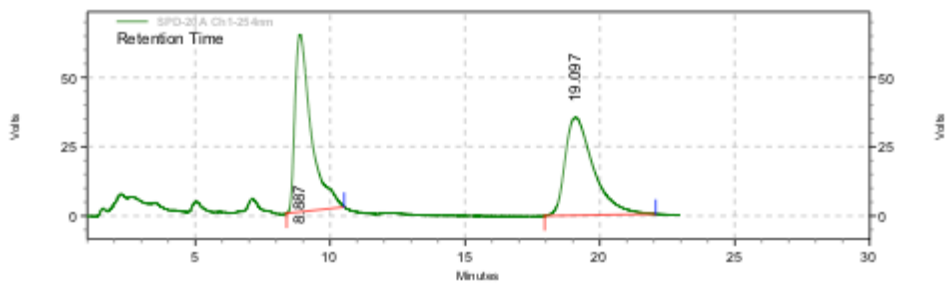

**SPD-20A**  
**Ch1-254nm**  
**Results**

| Retention Time | Area           | Area %        | Height       | Height %      |
|----------------|----------------|---------------|--------------|---------------|
| 8.887          | 2683893        | 50.94         | 64126        | 64.40         |
| 19.097         | 2584768        | 49.06         | 35441        | 35.60         |
| <b>Totals</b>  | <b>5268661</b> | <b>100.00</b> | <b>99567</b> | <b>100.00</b> |

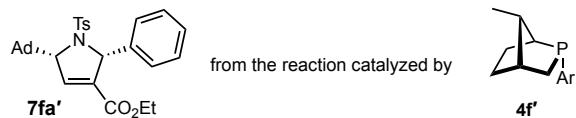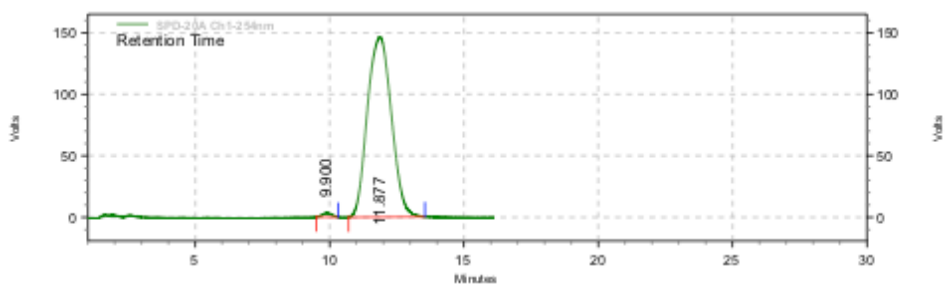

**SPD-20A**  
**Ch1-254nm**  
**Results**

| Retention Time | Area           | Area %        | Height        | Height %      |
|----------------|----------------|---------------|---------------|---------------|
| 9.900          | 83728          | 0.91          | 3267          | 2.18          |
| 11.877         | 9071094        | 99.09         | 146340        | 97.82         |
| <b>Totals</b>  | <b>9154822</b> | <b>100.00</b> | <b>149607</b> | <b>100.00</b> |

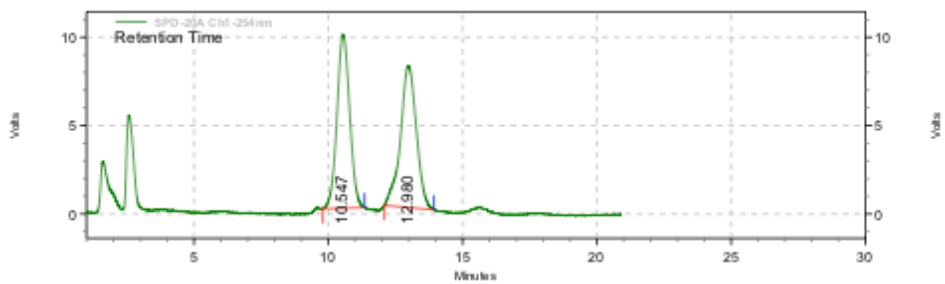

**SPD-20A**  
**Ch1-254nm**  
**Results**

| Retention Time | Area          | Area %        | Height       | Height %      |
|----------------|---------------|---------------|--------------|---------------|
| 10.547         | 323233        | 49.42         | 9831         | 55.09         |
| 12.980         | 330792        | 50.58         | 8015         | 44.91         |
| <b>Totals</b>  | <b>654025</b> | <b>100.00</b> | <b>17846</b> | <b>100.00</b> |

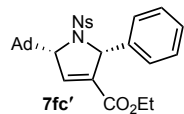

from the reaction catalyzed by

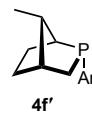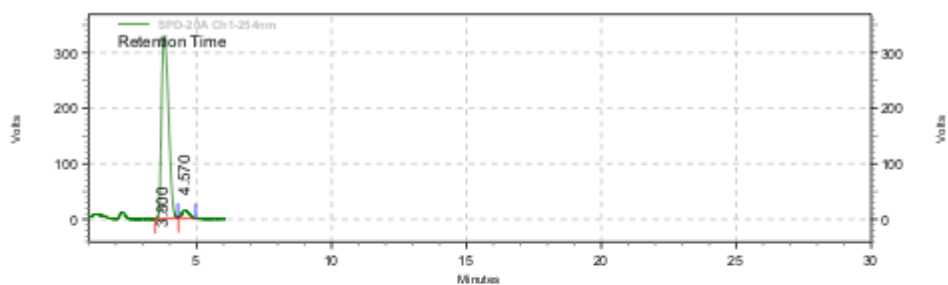

SPD-20A  
Ch1-254nm  
Results

| Retention Time | Area           | Area %        | Height        | Height %      |
|----------------|----------------|---------------|---------------|---------------|
| 3.800          | 5921427        | 95.97         | 326938        | 95.88         |
| 4.570          | 248457         | 4.03          | 14034         | 4.12          |
| <b>Totals</b>  | <b>6169884</b> | <b>100.00</b> | <b>340972</b> | <b>100.00</b> |

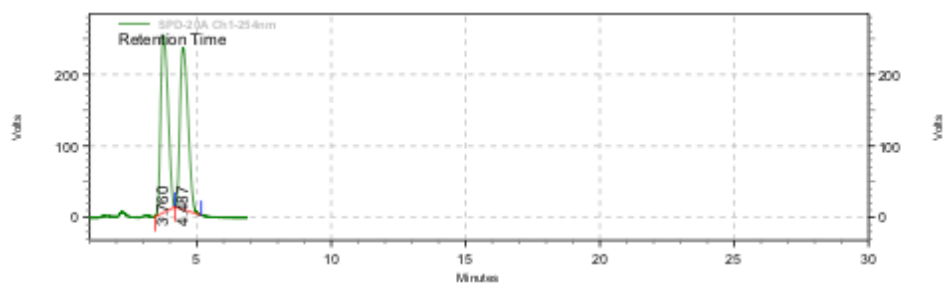

SPD-20A  
Ch1-254nm  
Results

| Retention Time | Area           | Area %        | Height        | Height %      |
|----------------|----------------|---------------|---------------|---------------|
| 3.760          | 4718386        | 49.99         | 246267        | 52.18         |
| 4.487          | 4719521        | 50.01         | 225714        | 47.82         |
| <b>Totals</b>  | <b>9437907</b> | <b>100.00</b> | <b>471981</b> | <b>100.00</b> |

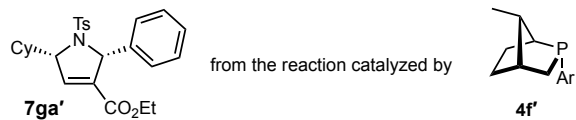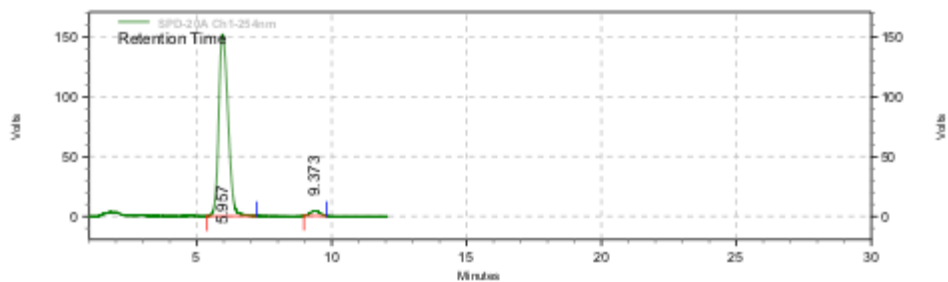

SPD-20A  
Ch1-254nm  
Results

| Retention Time | Area    | Area % | Height | Height % |
|----------------|---------|--------|--------|----------|
| 5.957          | 3657089 | 97.19  | 151877 | 97.31    |
| 9.373          | 105851  | 2.81   | 4191   | 2.69     |

| Totals | Area    | Area % | Height | Height % |
|--------|---------|--------|--------|----------|
|        | 3762940 | 100.00 | 156068 | 100.00   |

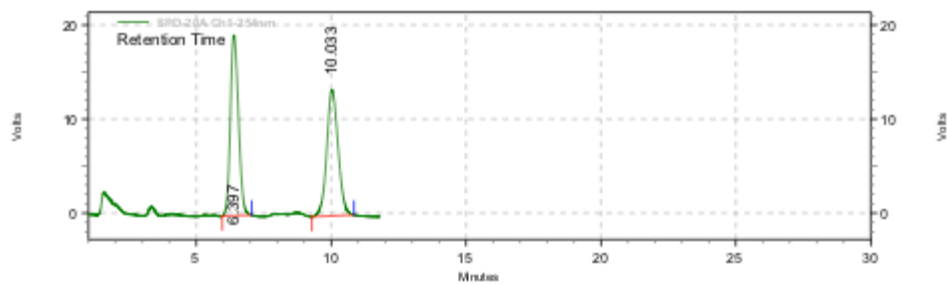

SPD-20A  
Ch1-254nm  
Results

| Retention Time | Area   | Area % | Height | Height % |
|----------------|--------|--------|--------|----------|
| 6.397          | 401445 | 50.55  | 19222  | 58.99    |
| 10.033         | 392659 | 49.45  | 13361  | 41.01    |

| Totals | Area   | Area % | Height | Height % |
|--------|--------|--------|--------|----------|
|        | 794104 | 100.00 | 32583  | 100.00   |

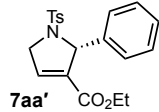

from the reaction catalyzed by

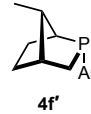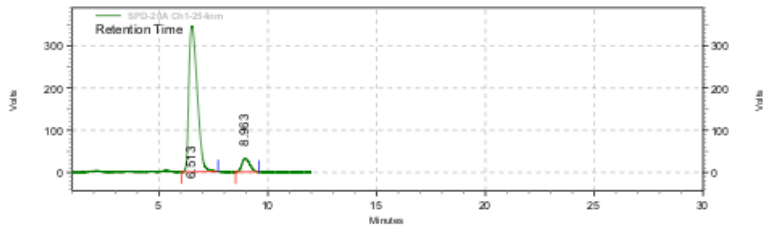

SPD-20A  
Ch1-254nm  
Results

| Retention Time | Area    | Area % | Height | Height % |
|----------------|---------|--------|--------|----------|
| 6.513          | 9244532 | 91.74  | 345295 | 91.34    |
| 8.963          | 832089  | 8.26   | 32727  | 8.66     |

| Totals | Area     | Area % | Height | Height % |
|--------|----------|--------|--------|----------|
|        | 10076621 | 100.00 | 378022 | 100.00   |

After recrystallization

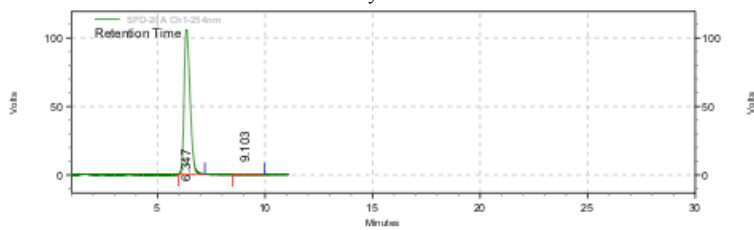

SPD-20A  
Ch1-254nm  
Results

| Retention Time | Area    | Area % | Height | Height % |
|----------------|---------|--------|--------|----------|
| 6.347          | 2016379 | 99.82  | 105699 | 99.94    |
| 9.103          | 3711    | 0.18   | 66     | 0.06     |

| Totals | Area    | Area % | Height | Height % |
|--------|---------|--------|--------|----------|
|        | 2020090 | 100.00 | 105765 | 100.00   |

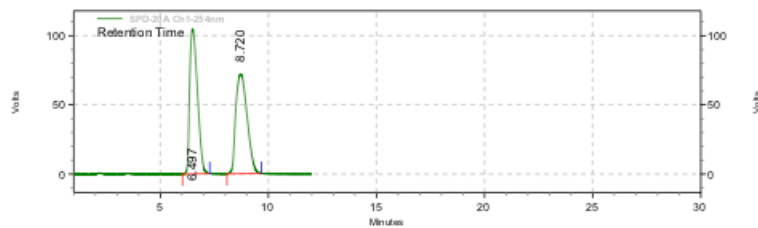

SPD-20A  
Ch1-254nm  
Results

| Retention Time | Area    | Area % | Height | Height % |
|----------------|---------|--------|--------|----------|
| 6.497          | 2618856 | 50.00  | 104665 | 59.26    |
| 8.720          | 2618481 | 50.00  | 71946  | 40.74    |

| Totals | Area    | Area % | Height | Height % |
|--------|---------|--------|--------|----------|
|        | 5237337 | 100.00 | 176611 | 100.00   |

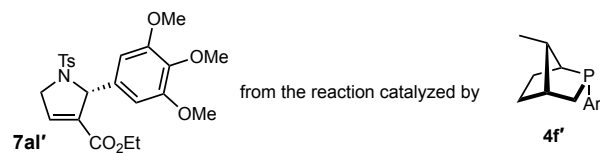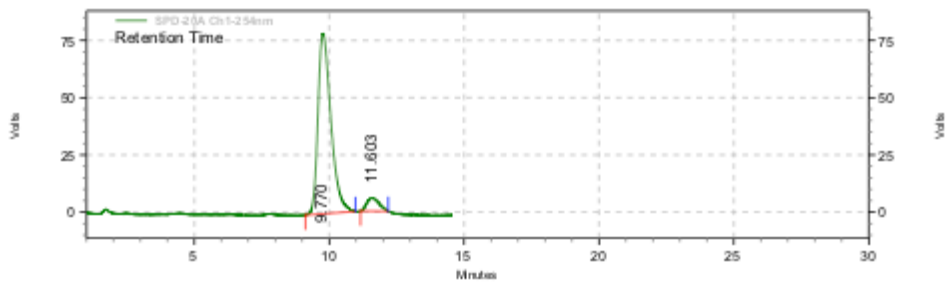

**SPD-20A**  
**Ch1-254nm**  
**Results**

| Retention Time | Area           | Area %        | Height       | Height %      |
|----------------|----------------|---------------|--------------|---------------|
| 9.770          | 2624074        | 93.46         | 78767        | 93.16         |
| 11.603         | 183629         | 6.54          | 5779         | 6.84          |
| <b>Totals</b>  | <b>2807703</b> | <b>100.00</b> | <b>84546</b> | <b>100.00</b> |

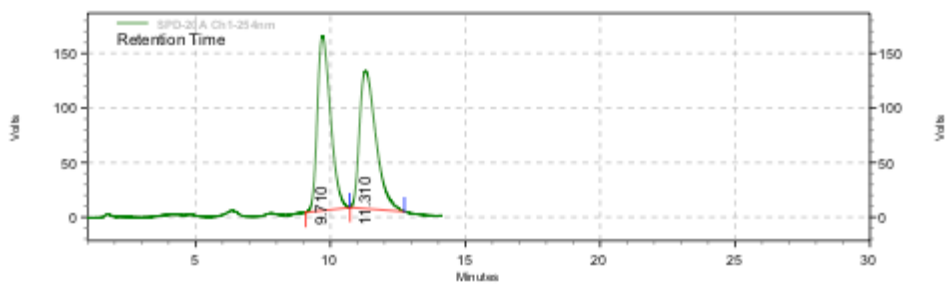

**SPD-20A**  
**Ch1-254nm**  
**Results**

| Retention Time | Area            | Area %        | Height        | Height %      |
|----------------|-----------------|---------------|---------------|---------------|
| 9.710          | 5430661         | 50.35         | 160058        | 55.88         |
| 11.310         | 5354979         | 49.65         | 126356        | 44.12         |
| <b>Totals</b>  | <b>10785640</b> | <b>100.00</b> | <b>286414</b> | <b>100.00</b> |

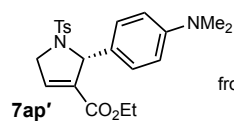

from the reaction catalyzed by

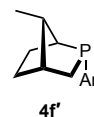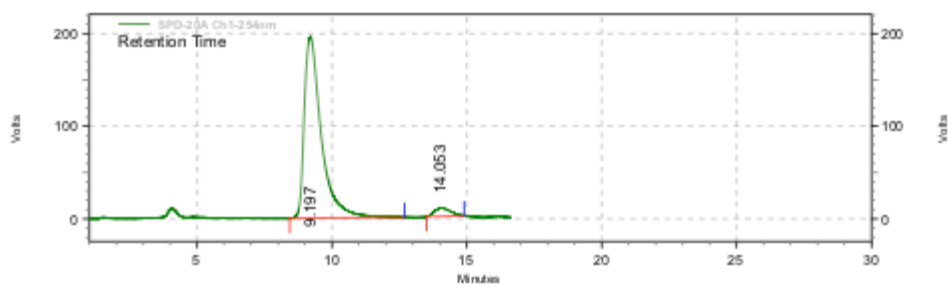

**SPD-20A**  
**Ch1-254nm**  
**Results**

| Retention Time | Area           | Area %        | Height        | Height %      |
|----------------|----------------|---------------|---------------|---------------|
| 9.197          | 8573443        | 95.85         | 195763        | 95.64         |
| 14.053         | 371576         | 4.15          | 8923          | 4.36          |
| <b>Totals</b>  | <b>8945019</b> | <b>100.00</b> | <b>204686</b> | <b>100.00</b> |

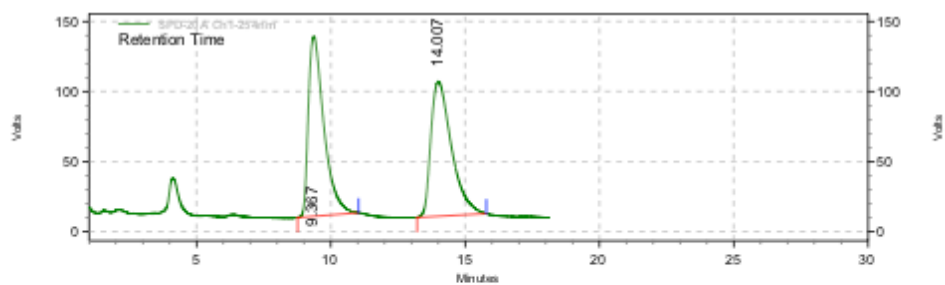

**SPD-20A**  
**Ch1-254nm**  
**Results**

| Retention Time | Area            | Area %        | Height        | Height %      |
|----------------|-----------------|---------------|---------------|---------------|
| 9.367          | 5188678         | 50.25         | 128350        | 57.14         |
| 14.007         | 5136133         | 49.75         | 96290         | 42.86         |
| <b>Totals</b>  | <b>10324811</b> | <b>100.00</b> | <b>224640</b> | <b>100.00</b> |



## 5. References

(1) Yang, H.; Gao, Y.; Qiao, X.; Xie, L.; Xu, X. Concise Total Synthesis of (–)-8-Epigrosheimin. *Org. Lett.* **2011**, *13*, 3670–3673.

(2) (a) Xu, Z.; Lu, X. A Novel [3+2] Cycloaddition Approach to Nitrogen Heterocycles via Phosphine-Catalyzed Reactions of 2,3-Butadienoates or 2-Butynoates and Dimethyl Acetylenedicarboxylate with Imines: A Convenient Synthesis of Pentabromopseudilin. *J. Org. Chem.* **1998**, *63*, 5031–5041. (b) Zhu, X.; Henry, C. E.; Kwon, O. A Highly Diastereoselective Synthesis of 3-Carboxy-2,5-disubstituted-3-pyrrolines by Phosphine Catalysis. *Tetrahedron* **2005**, *61*, 6276–6282. (c) Zhao, G.; Shi, M. Aza-Baylis–Hillman Reactions of *N*-Tosylated Aldimines with Activated Allenes and Alkynes in the Presence of Various Lewis Base Promoters. *J. Org. Chem.* **2005**, *70*, 9975–9984. (d) Tang, X.; Zhang, B.; He, Z.; Gao, R.; He, Z. 1,3,5-Triaza-7-phosphaadamantane (PTA): A Practical and Versatile Nucleophilic Phosphine Organocatalyst. *Adv. Synth. Catal.* **2007**, *349*, 2007–2017. (e) Zheng, S.; Lu, X. A Phosphine-Catalyzed [3 + 2] Annulation Reaction of Modified Allylic Compounds and *N*-Tosylimines. *Org. Lett.* **2008**, *10*, 4481–4484. (f) Watanabe, M.; Fiji, H. D.; Guo, L.; Chang, L.; Kinderman, S. S.; Slamon, D. J.; Kwon, O. Tamanoi, F. Inhibitors of Protein Geranylgeranyltransferase I and Rab Geranylgeranyltransferase Identified from a Library of Allenoate-derived Compounds. *J. Biol. Chem.* **2008**, *283*, 9571–9579. (g) Fang, Y.; Jacobsen, E. N. Cooperative, Highly Enantioselective Phosphinothiourea Catalysis of Imine–Allene [3 + 2] Cycloadditions. *J. Am. Chem. Soc.* **2008**, *130*, 5660–5661. (h) Henry, C. E.; Xu, Q.; Fan, Y. C.; Martin, T. J.; Belding, L.; Dudding, T.; Kwon, O. Hydroxyproline-Derived Pseudoenantiomeric [2.2.1] Bicyclic Phosphines: Asymmetric Synthesis of (+)- and (–)-Pyrrolines. *J. Am. Chem. Soc.* **2014**, *136*, 11890–11893.

## 6. Copies of $^1\text{H}$ , $^{13}\text{C}$ , and $^{31}\text{P}$ NMR Spectra

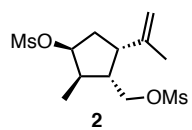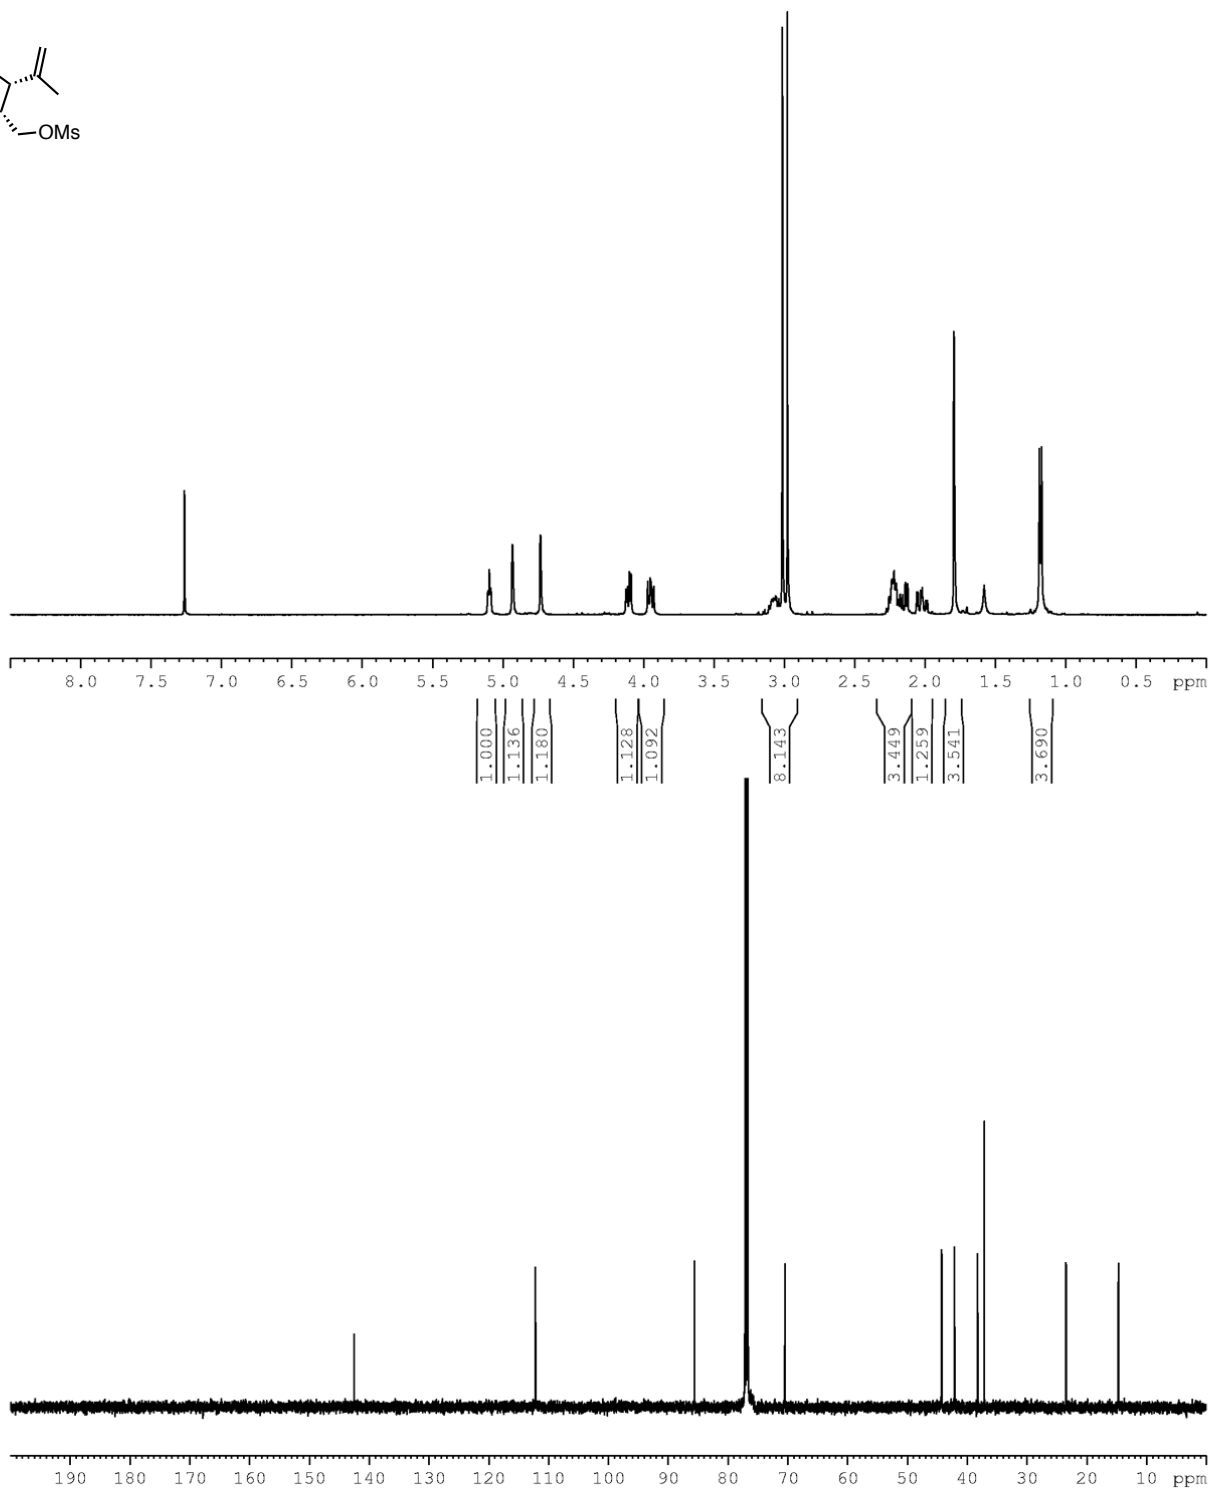

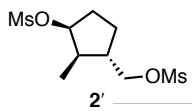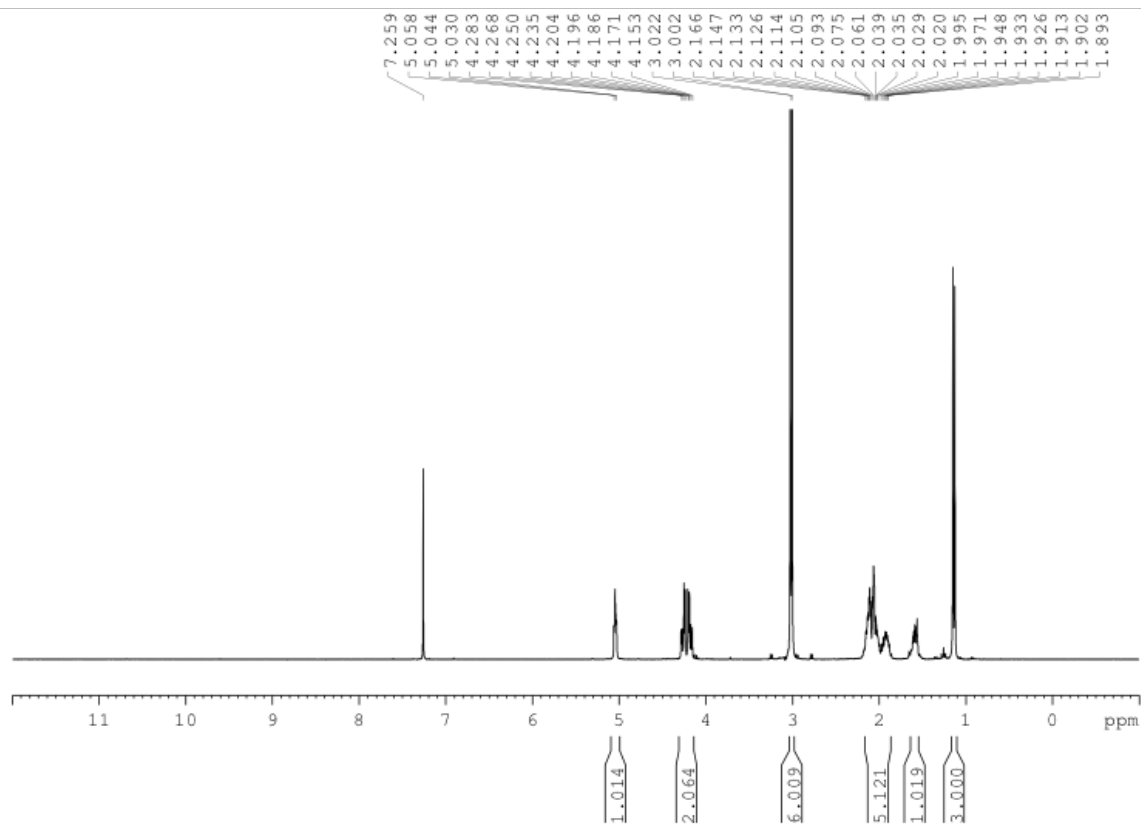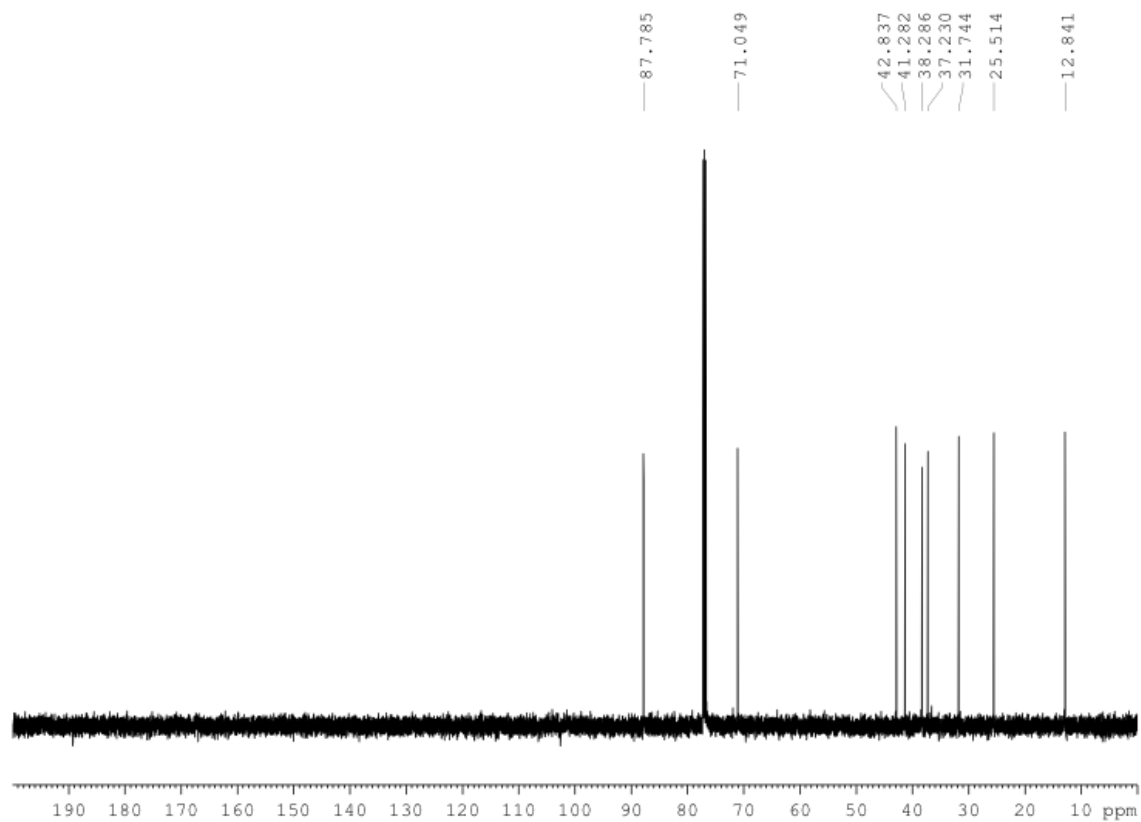

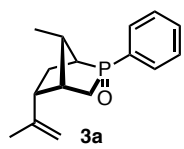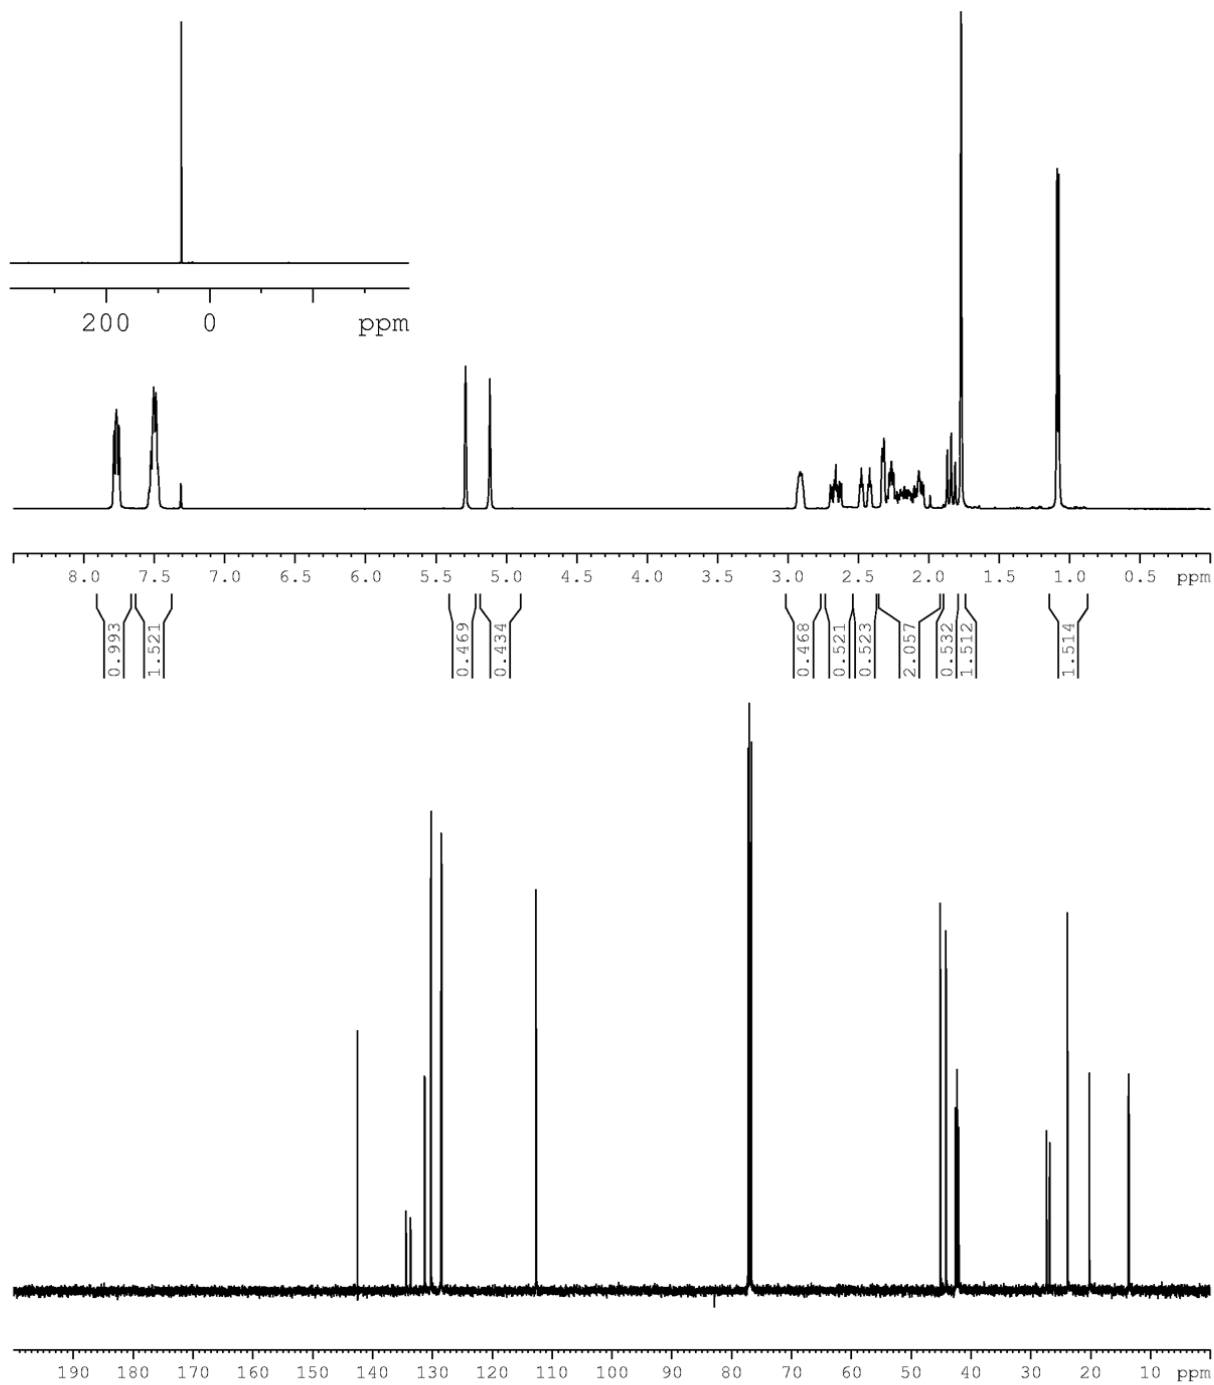

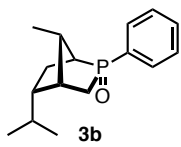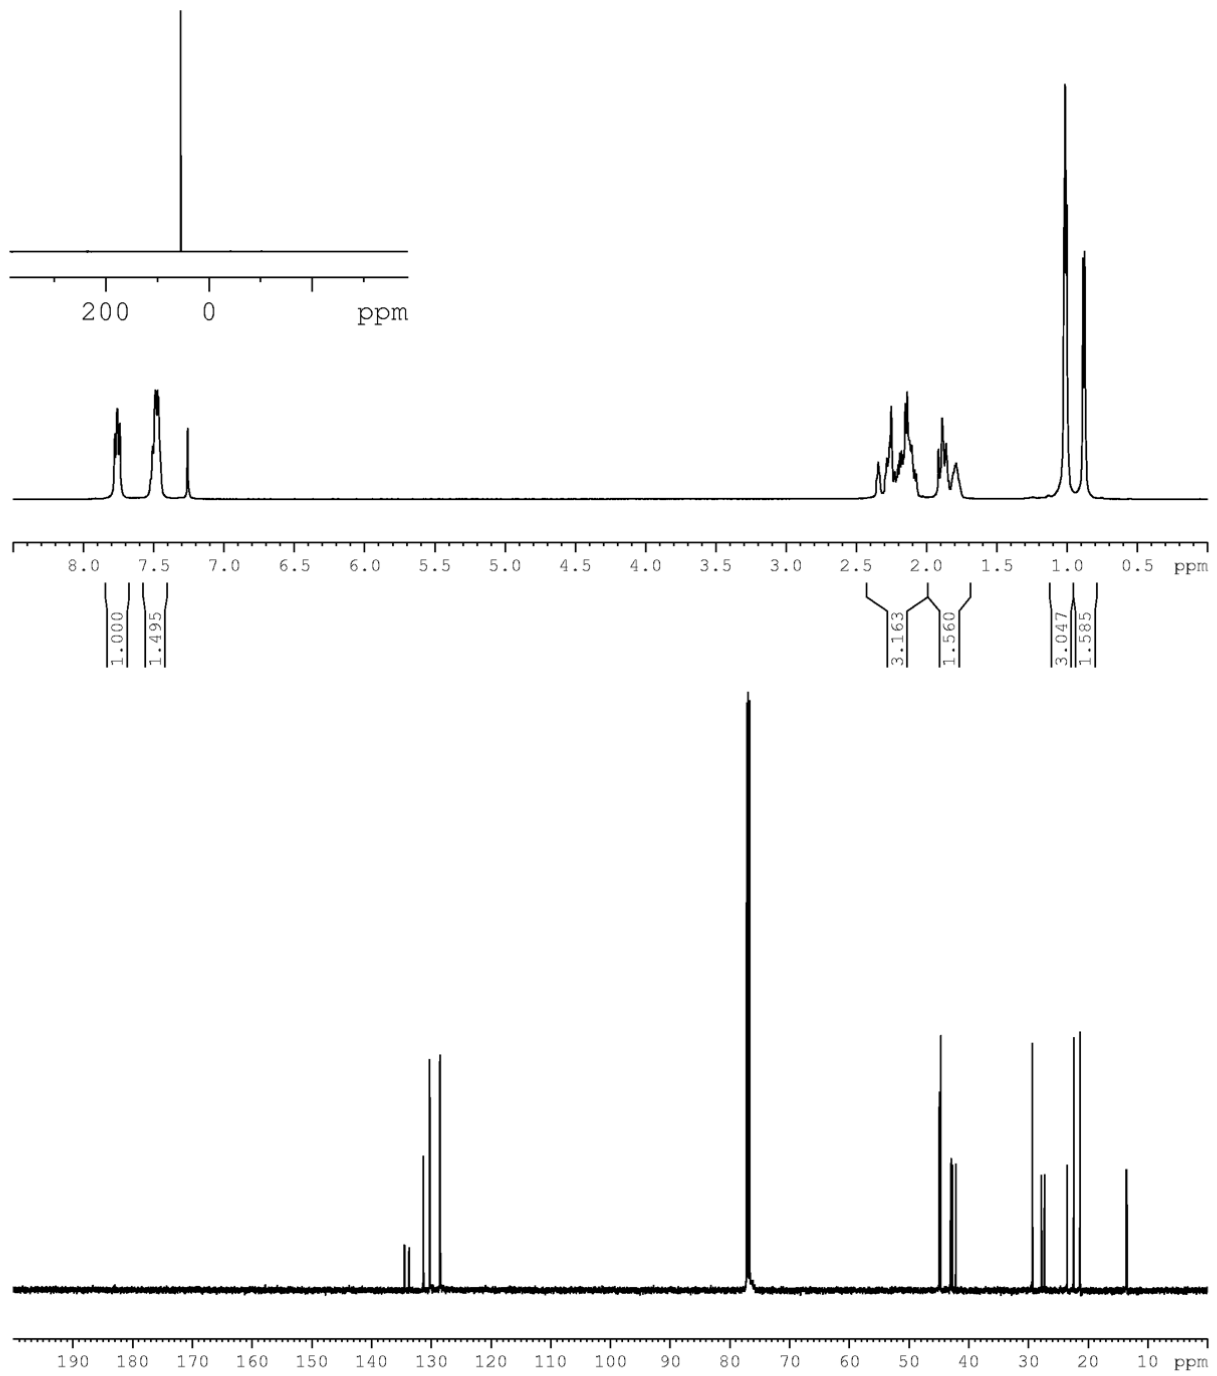

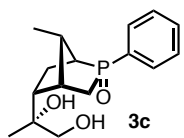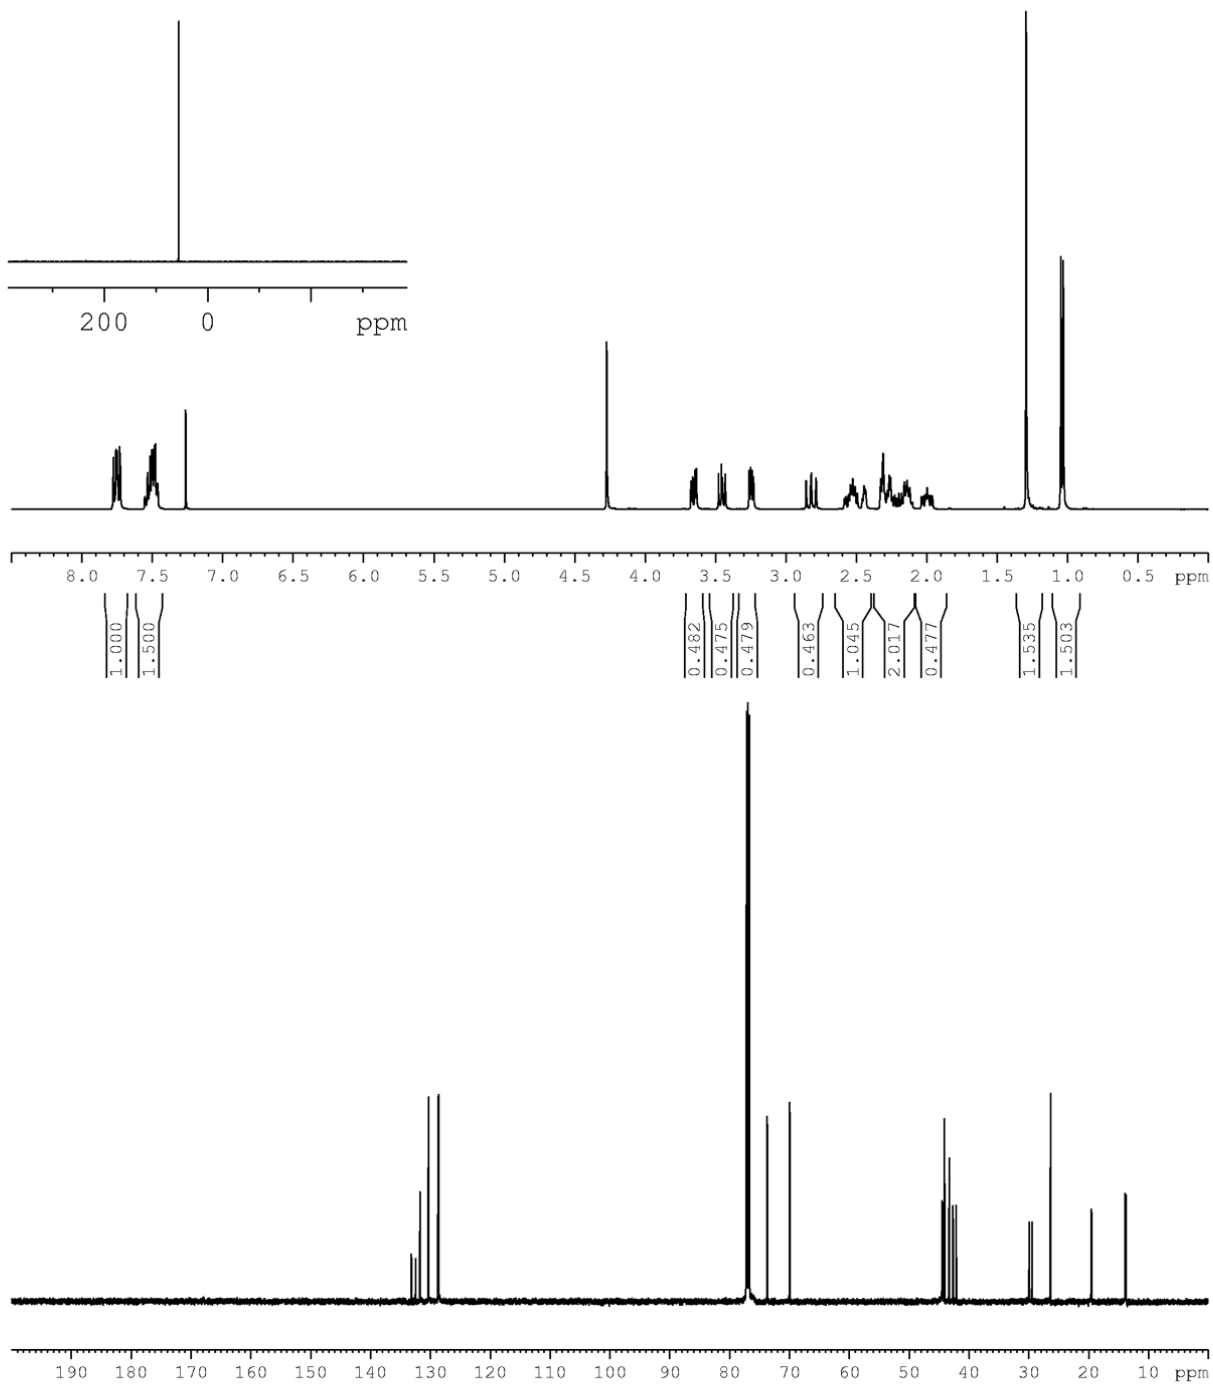

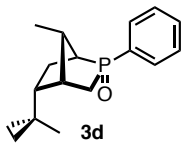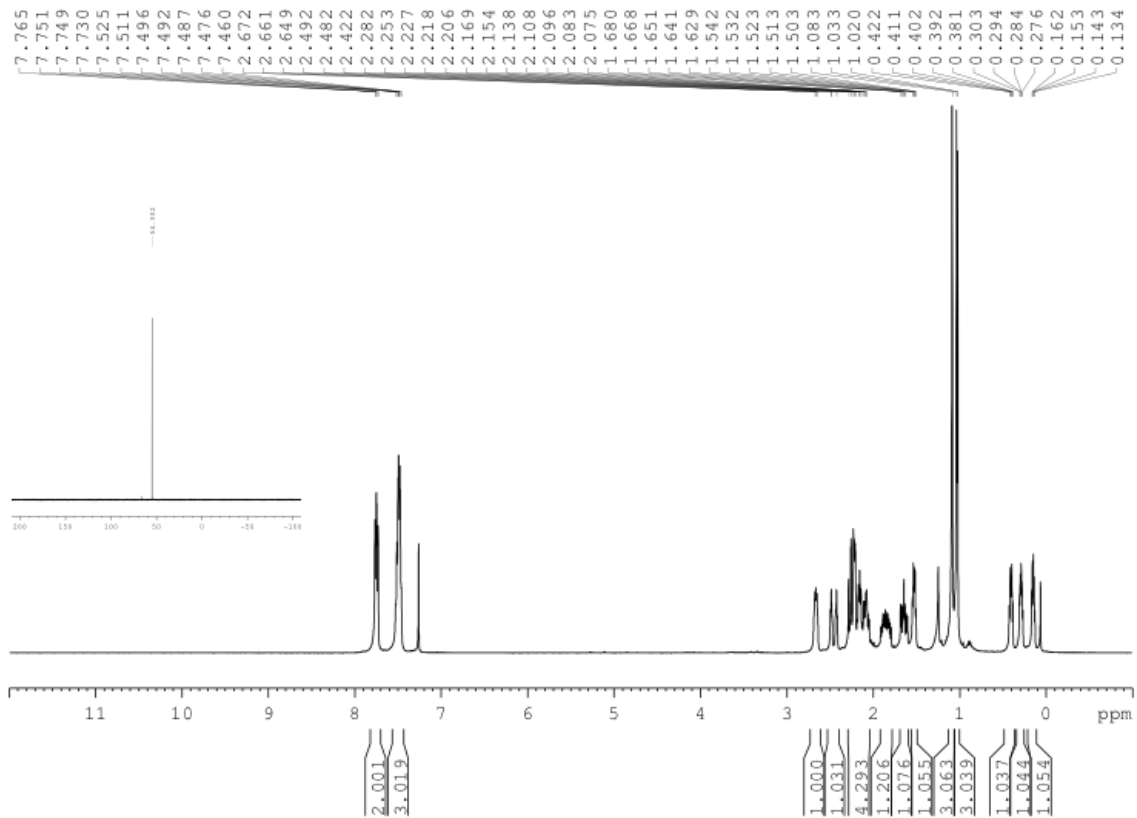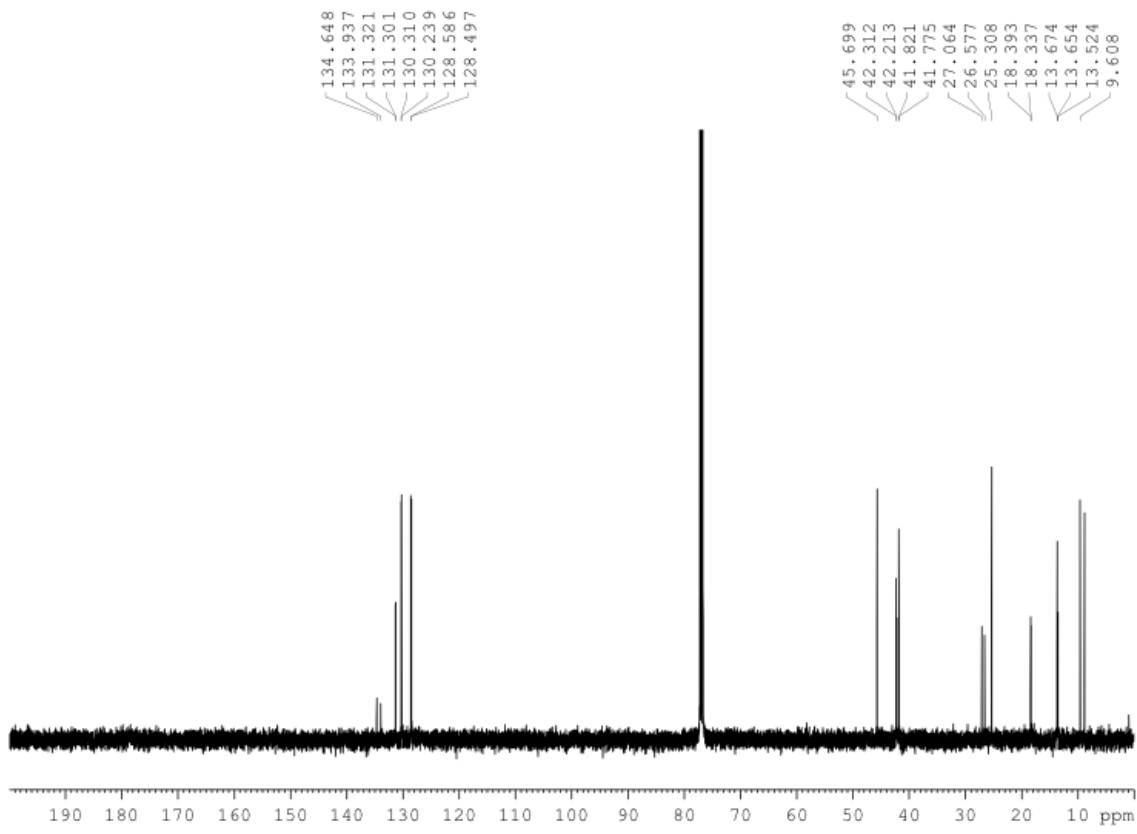

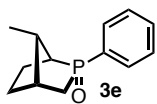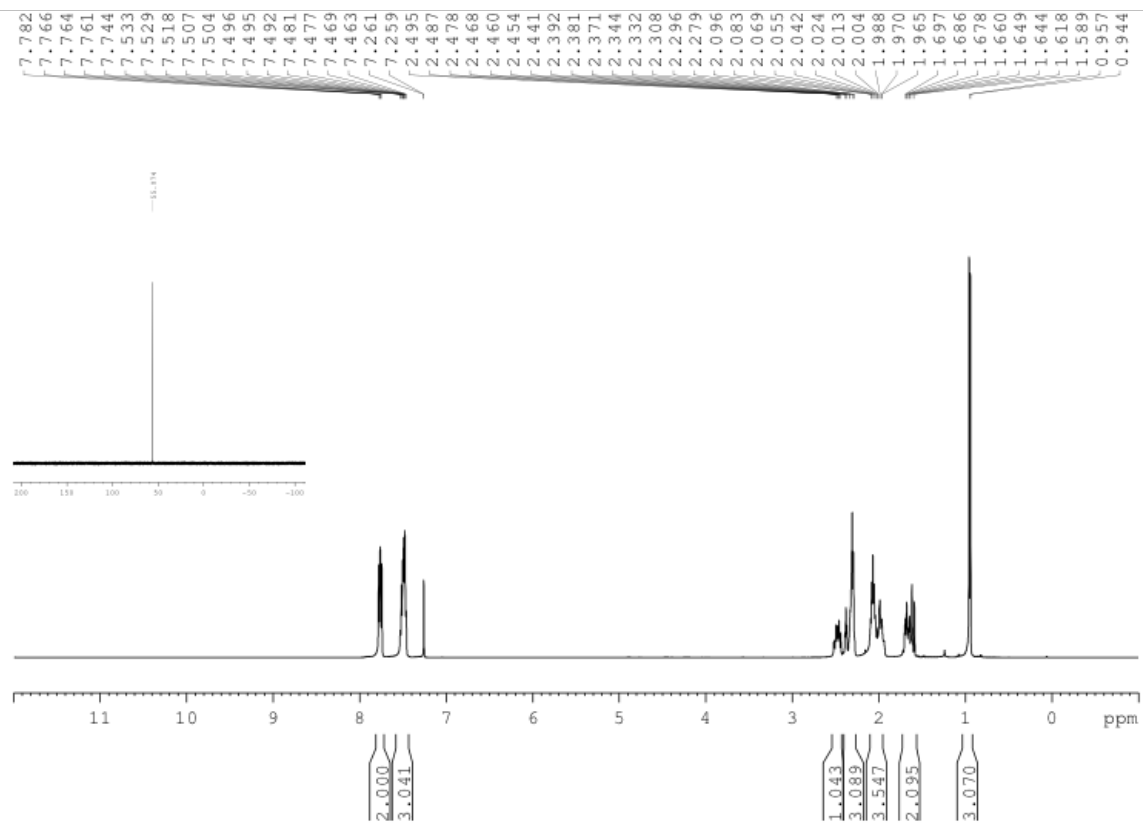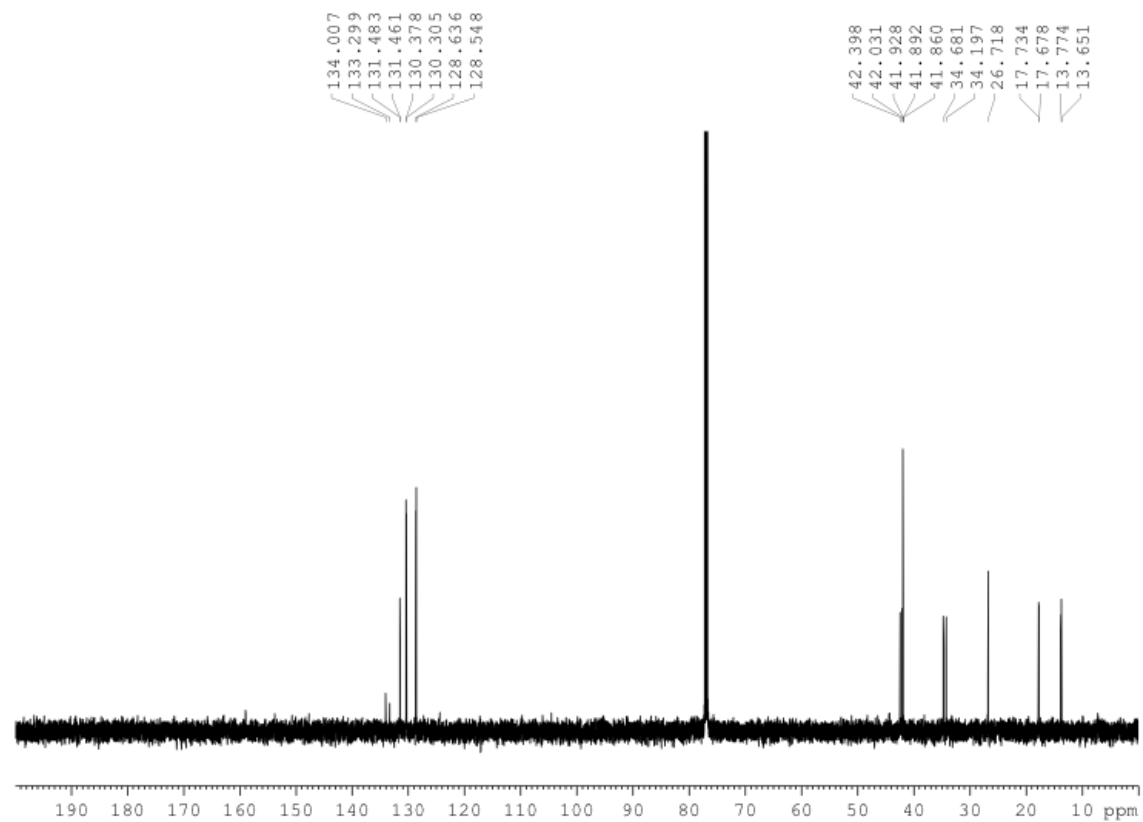



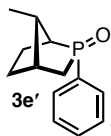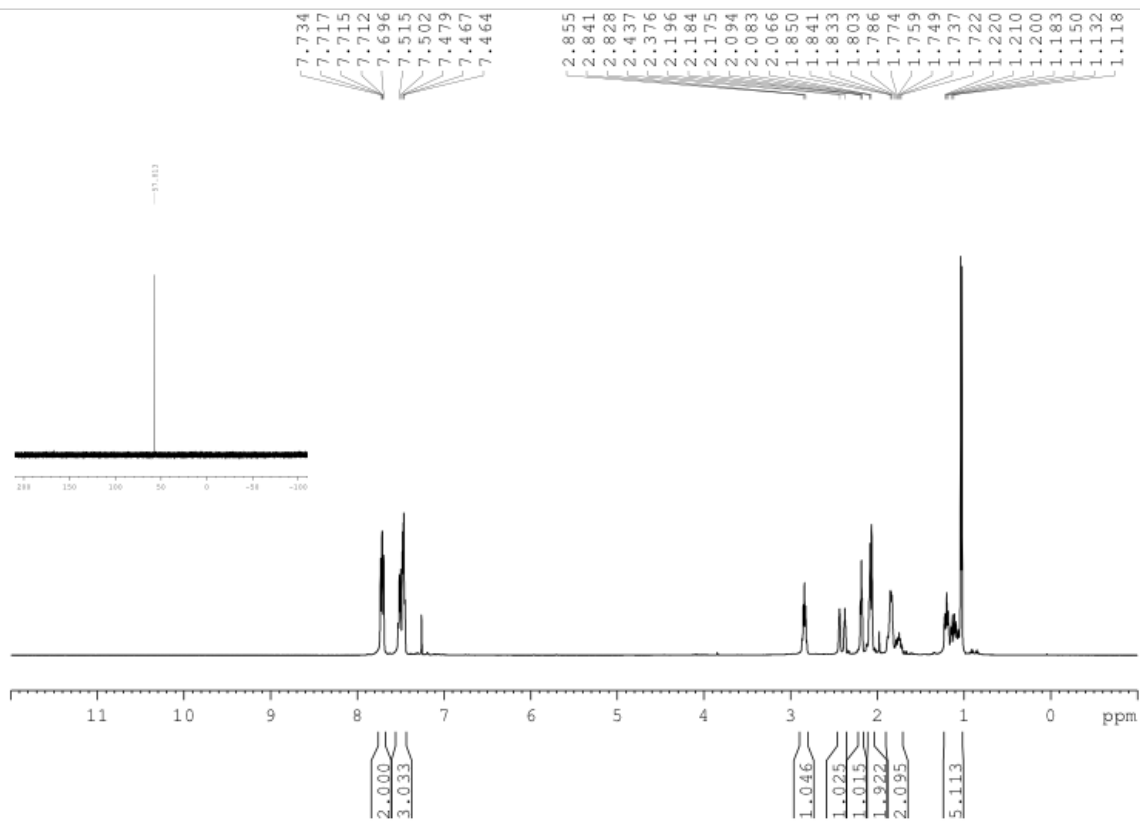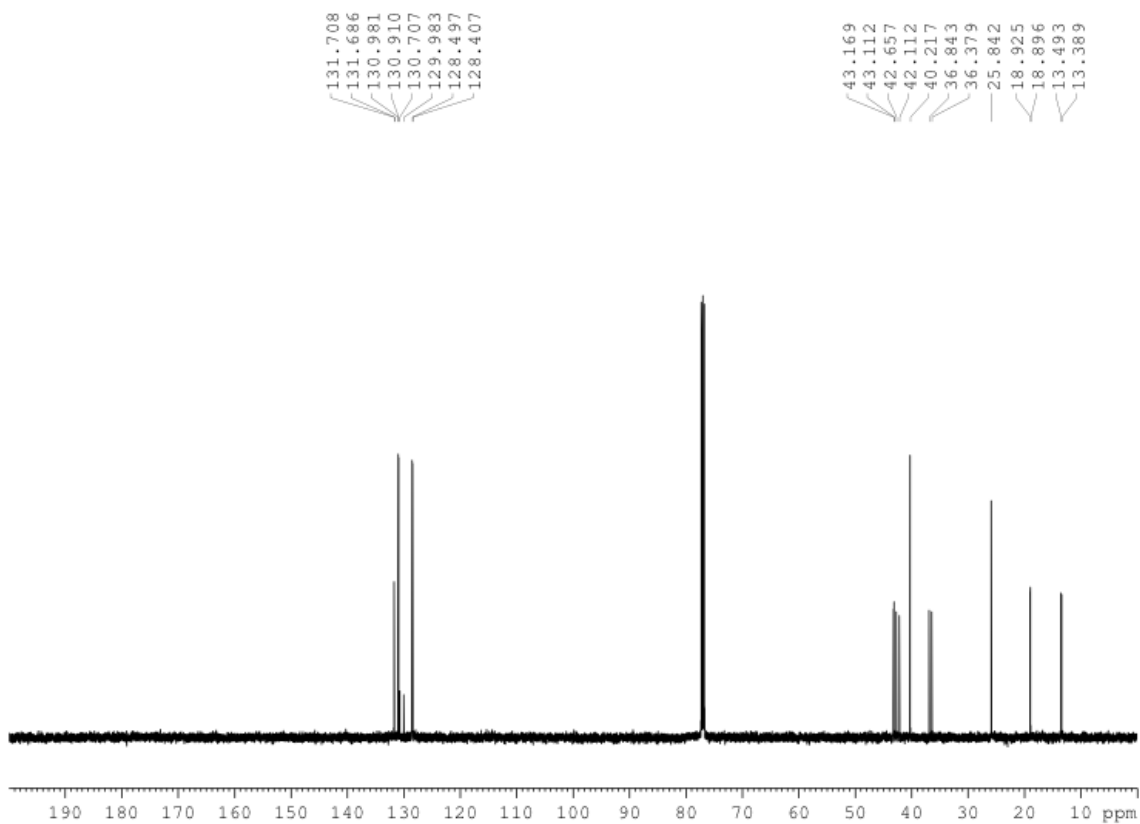

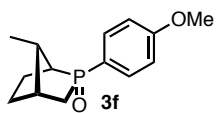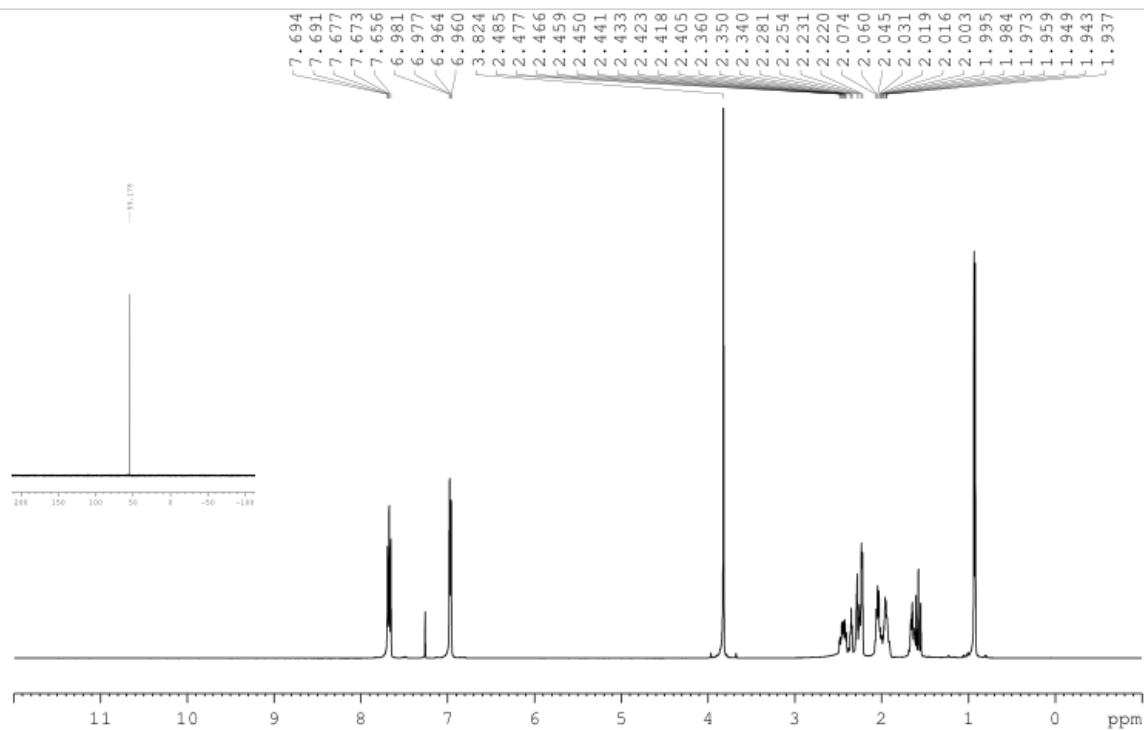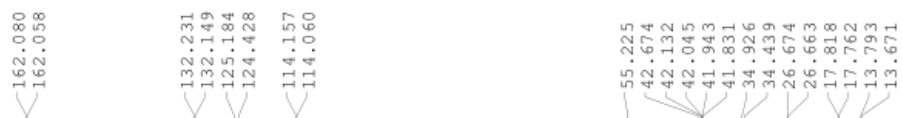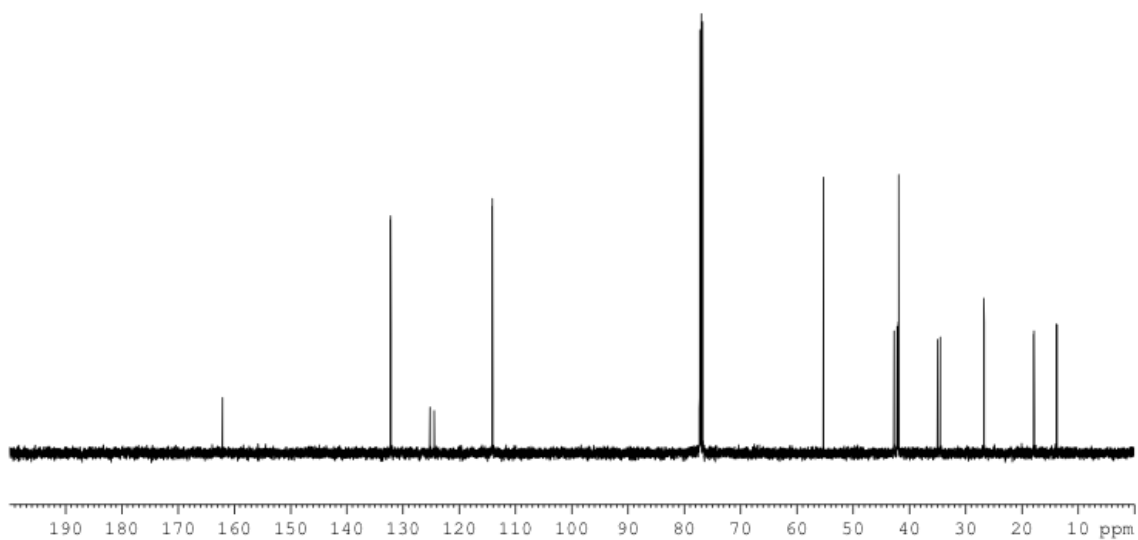

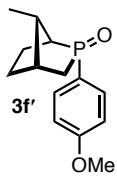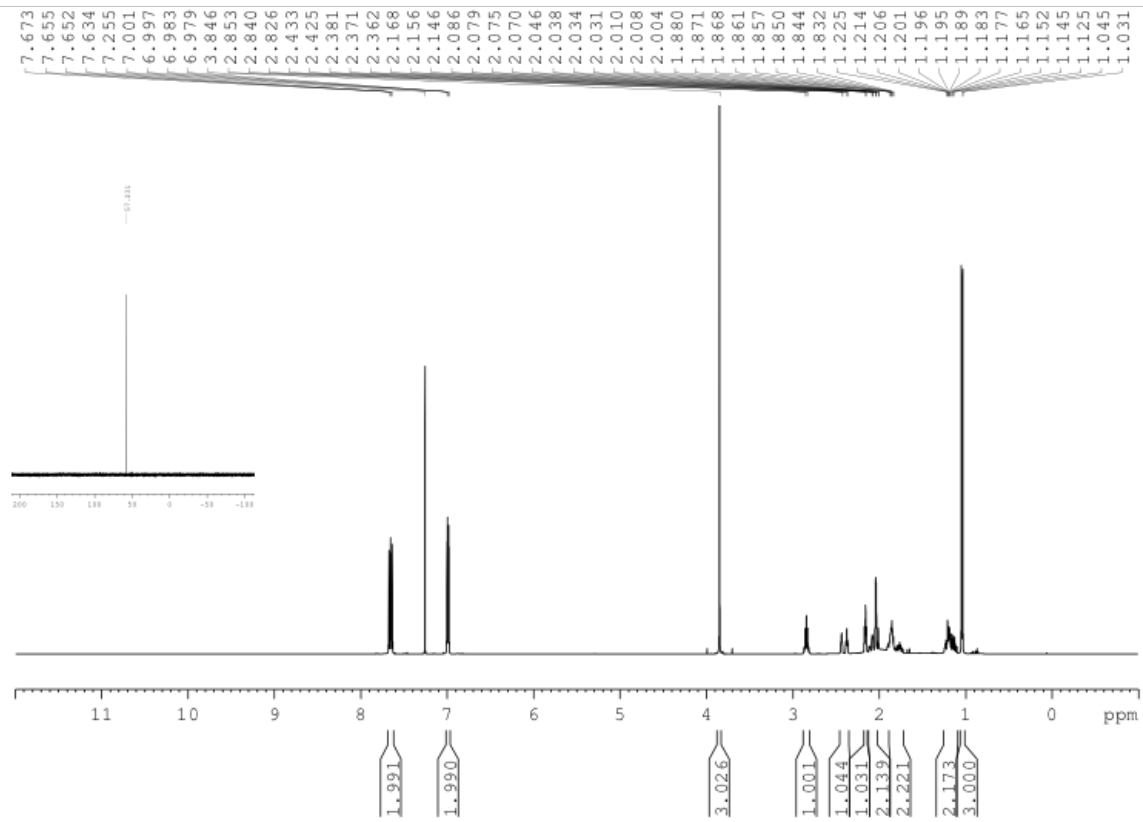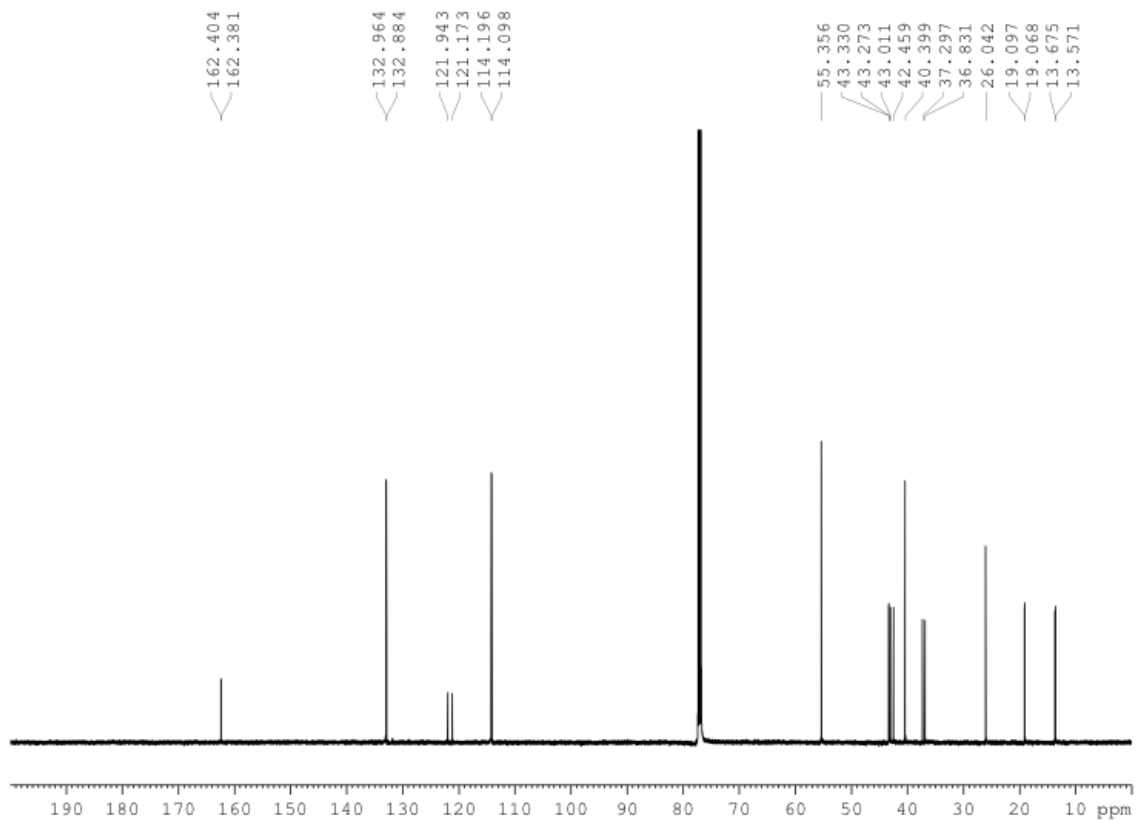

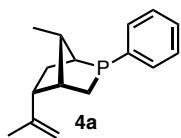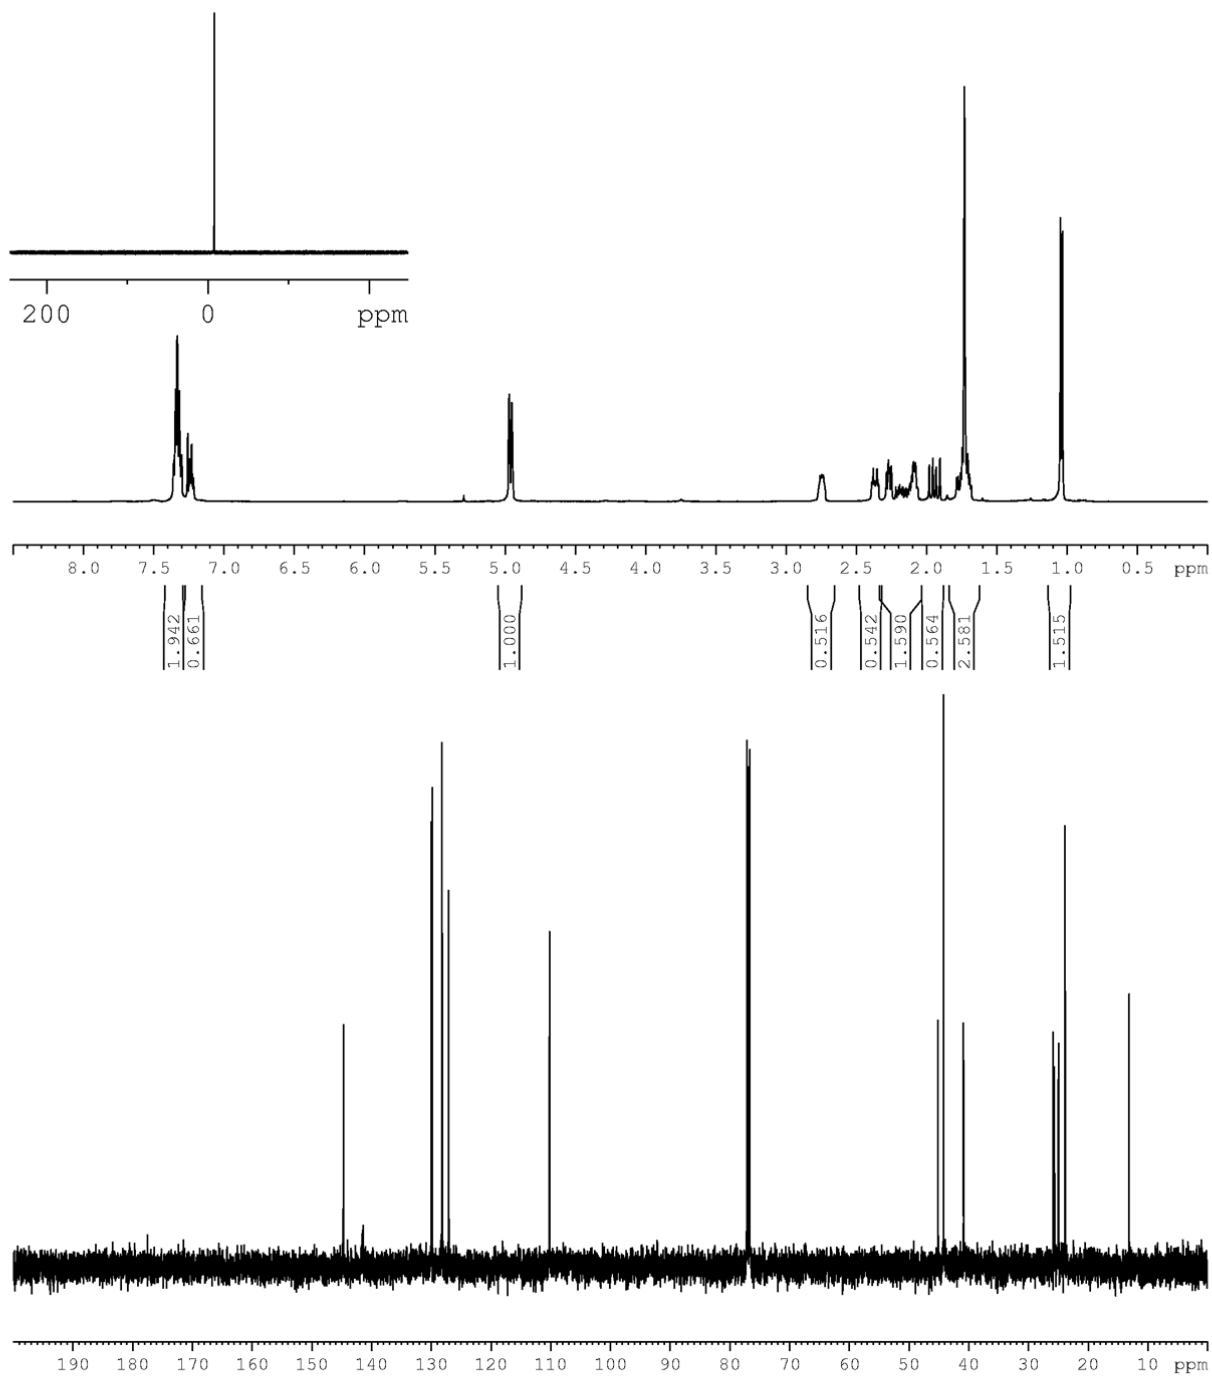

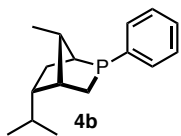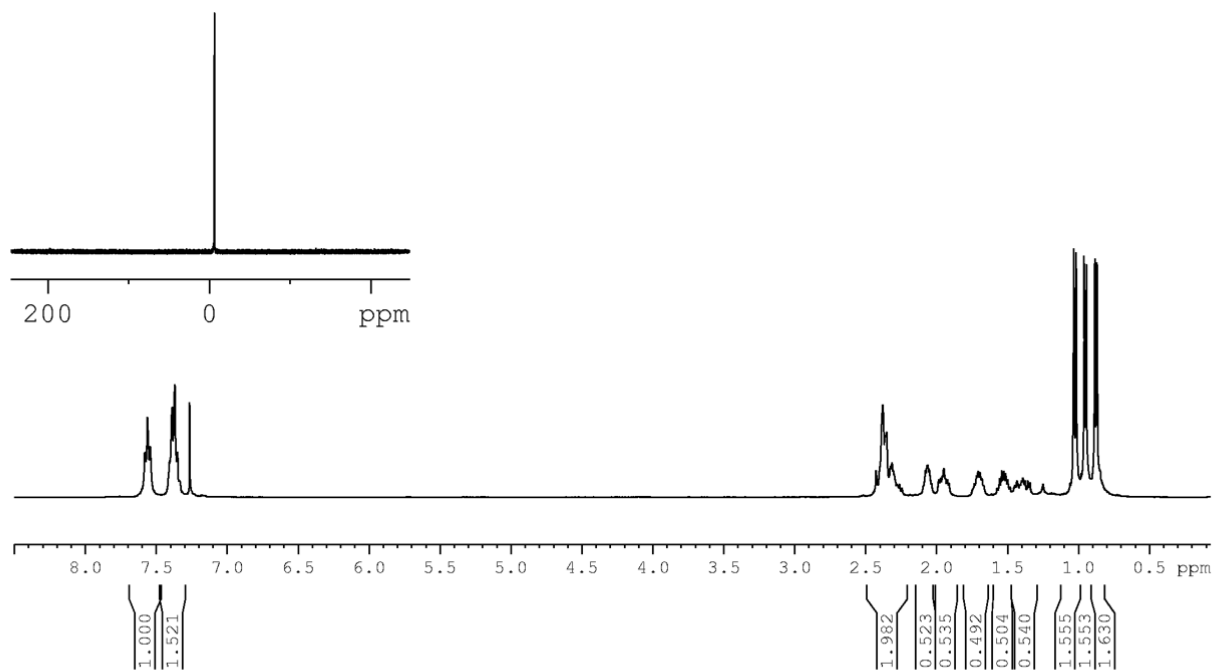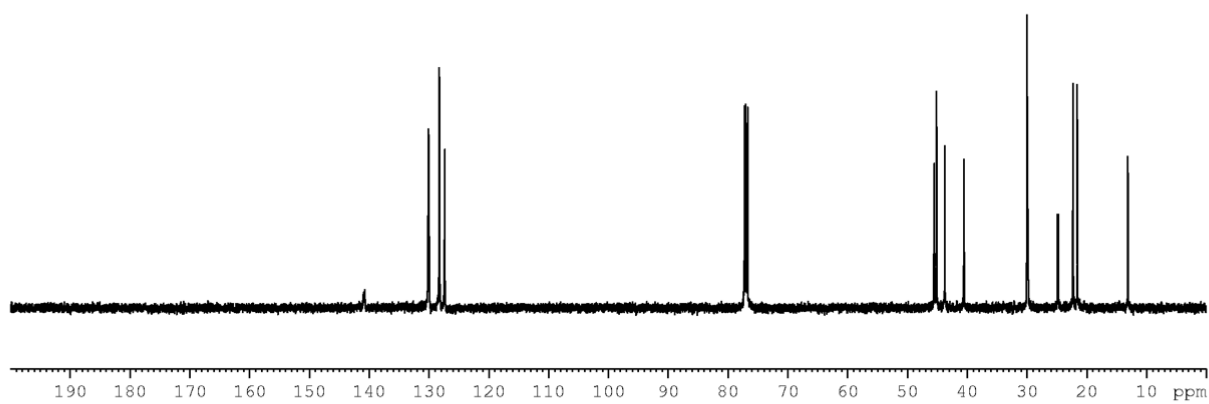

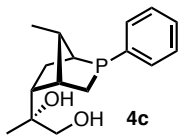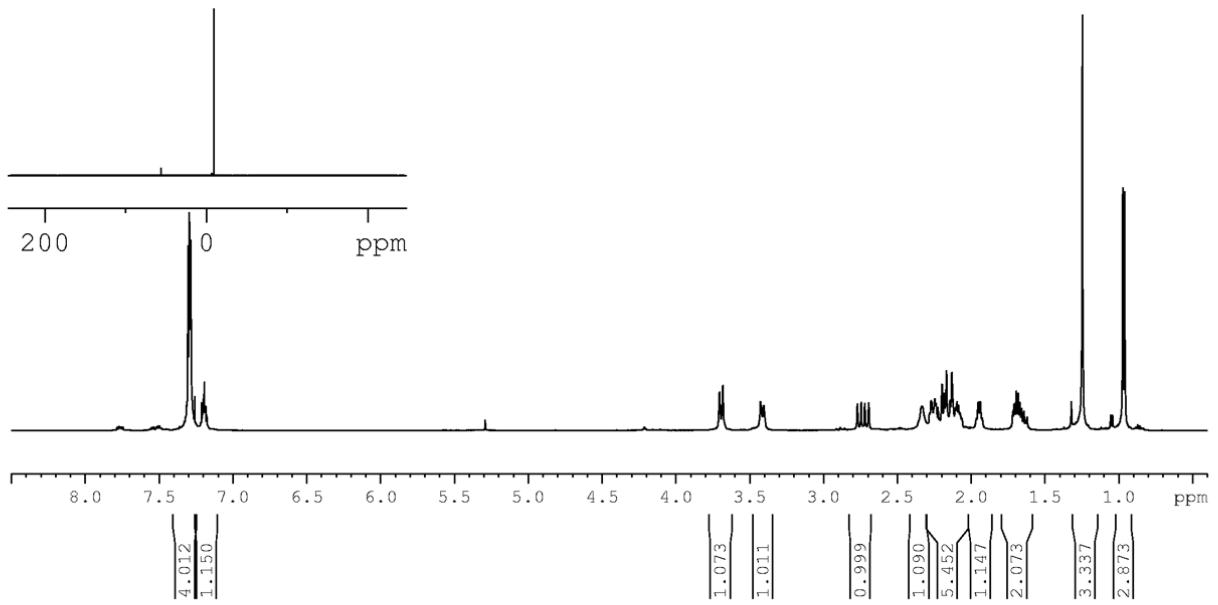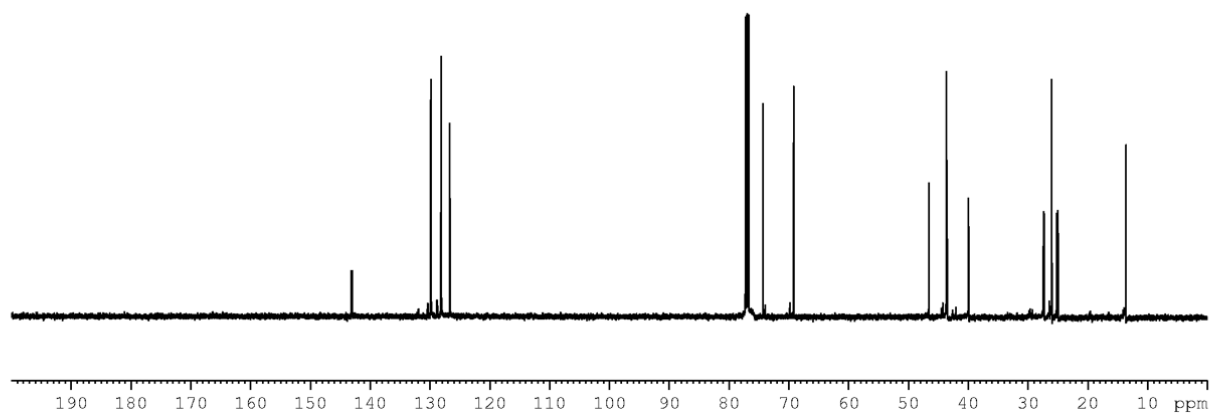

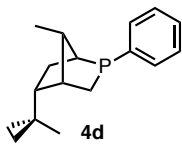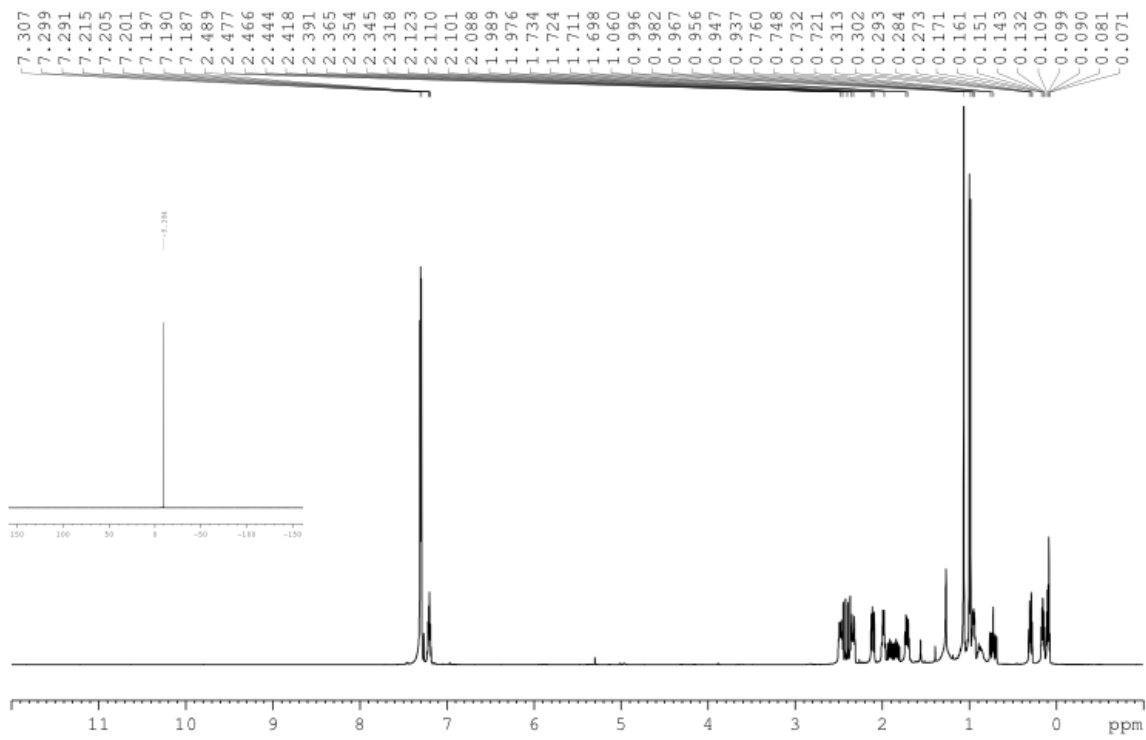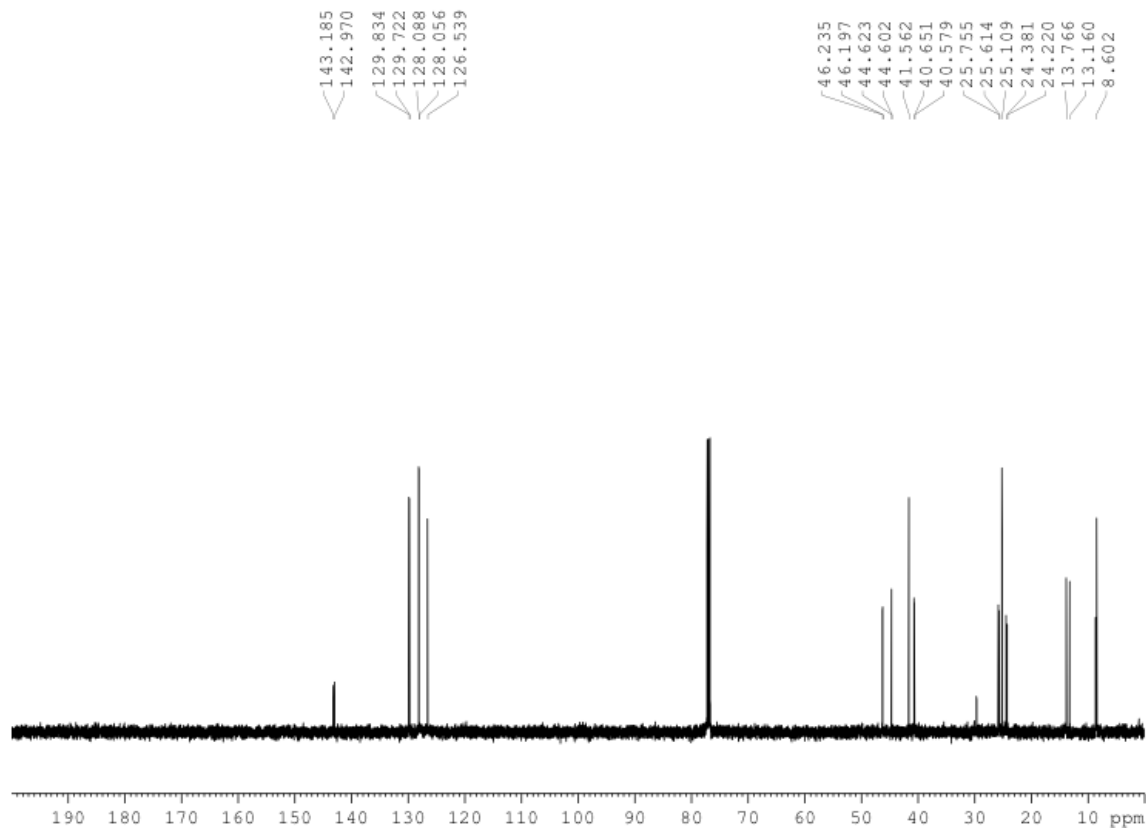

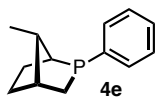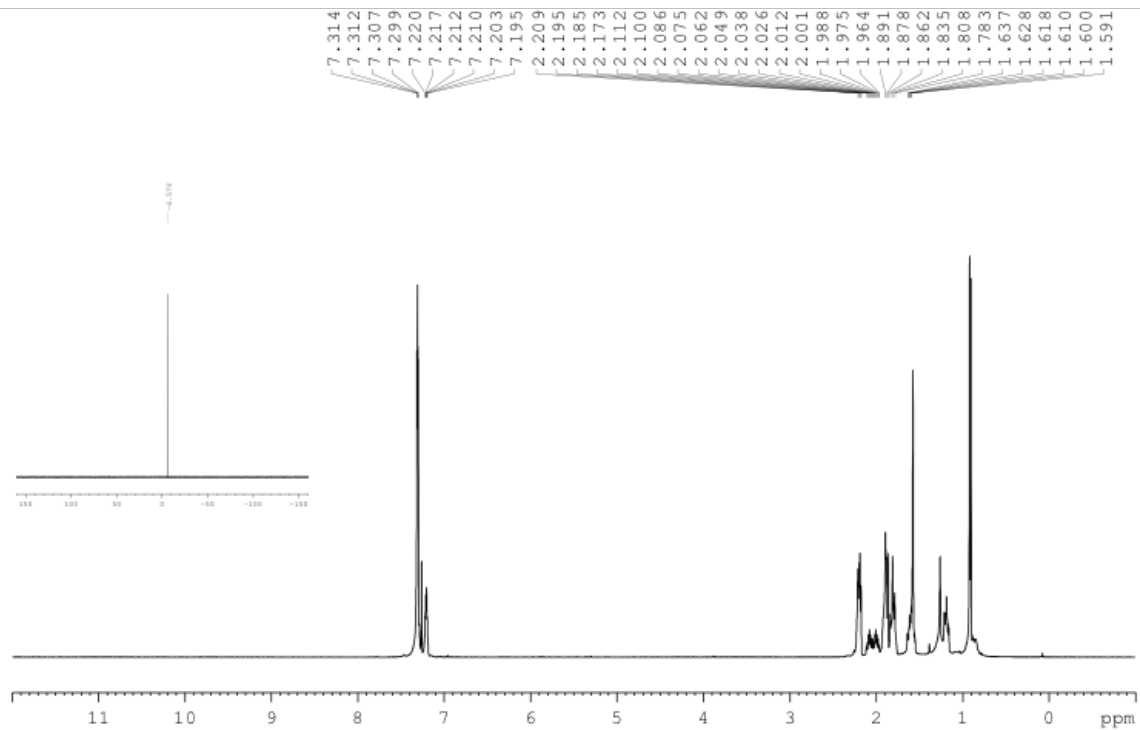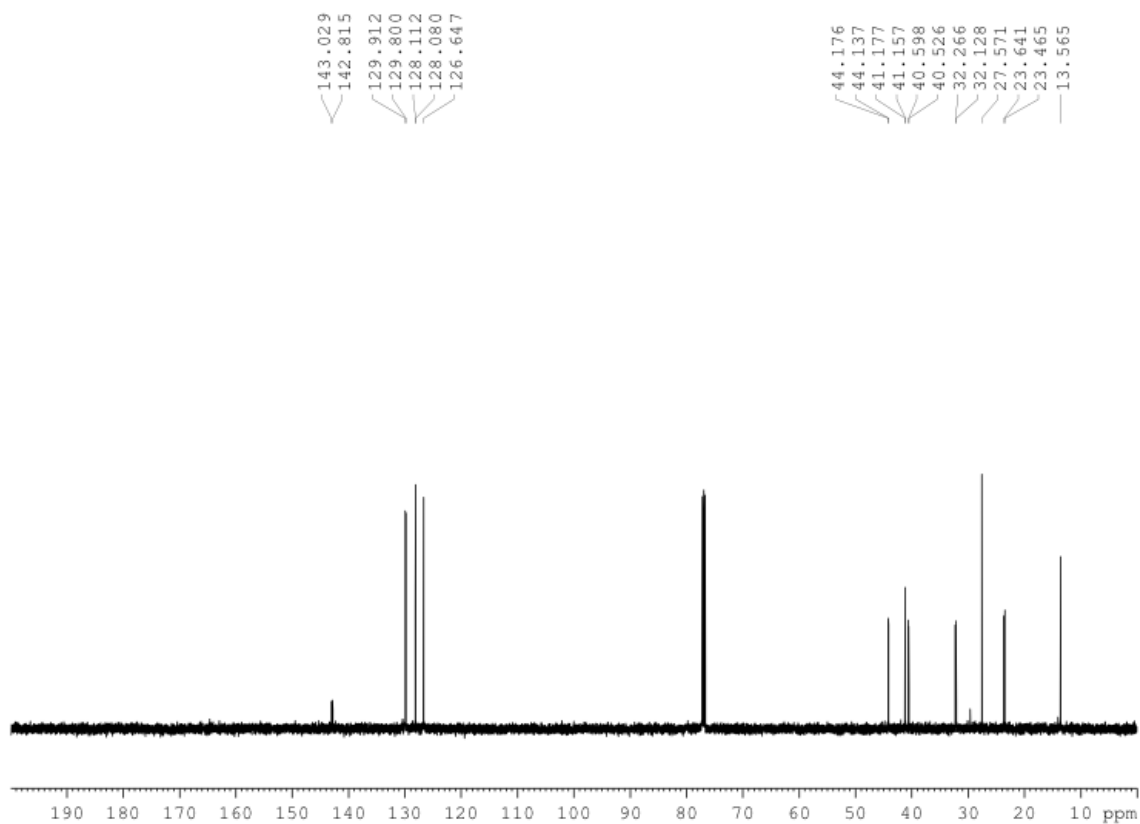



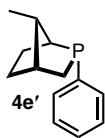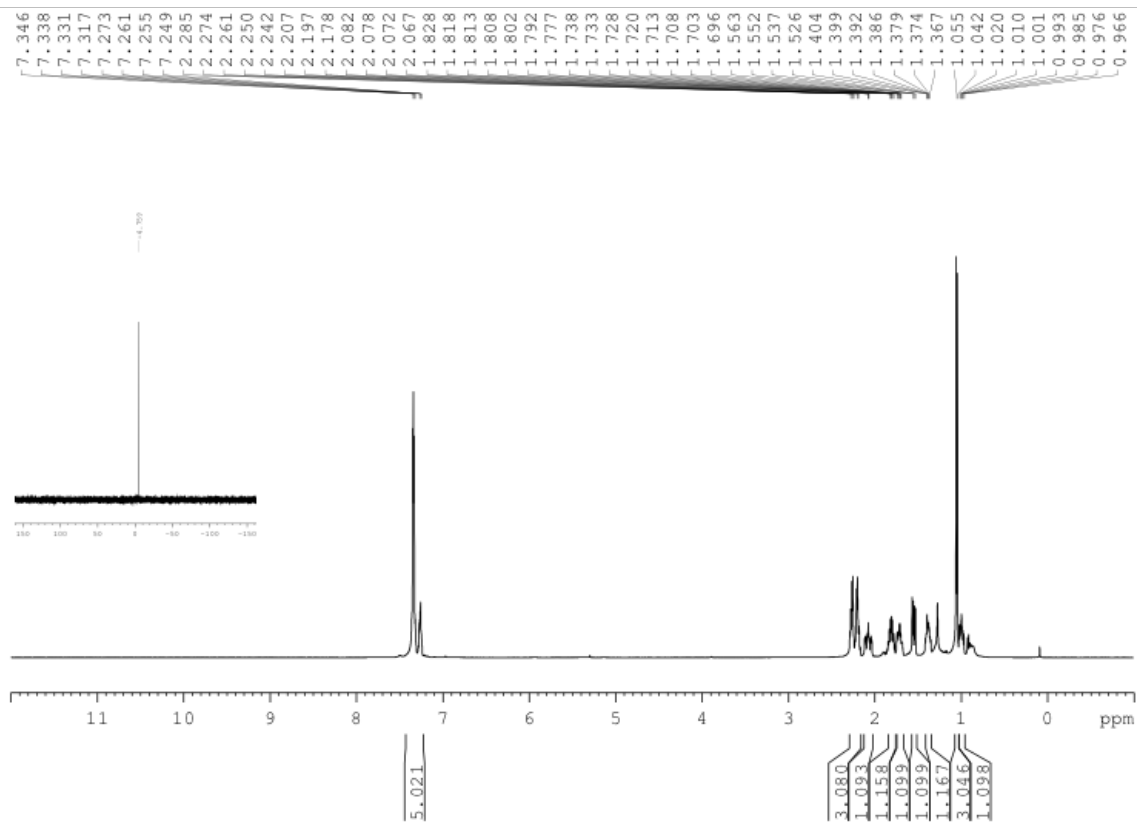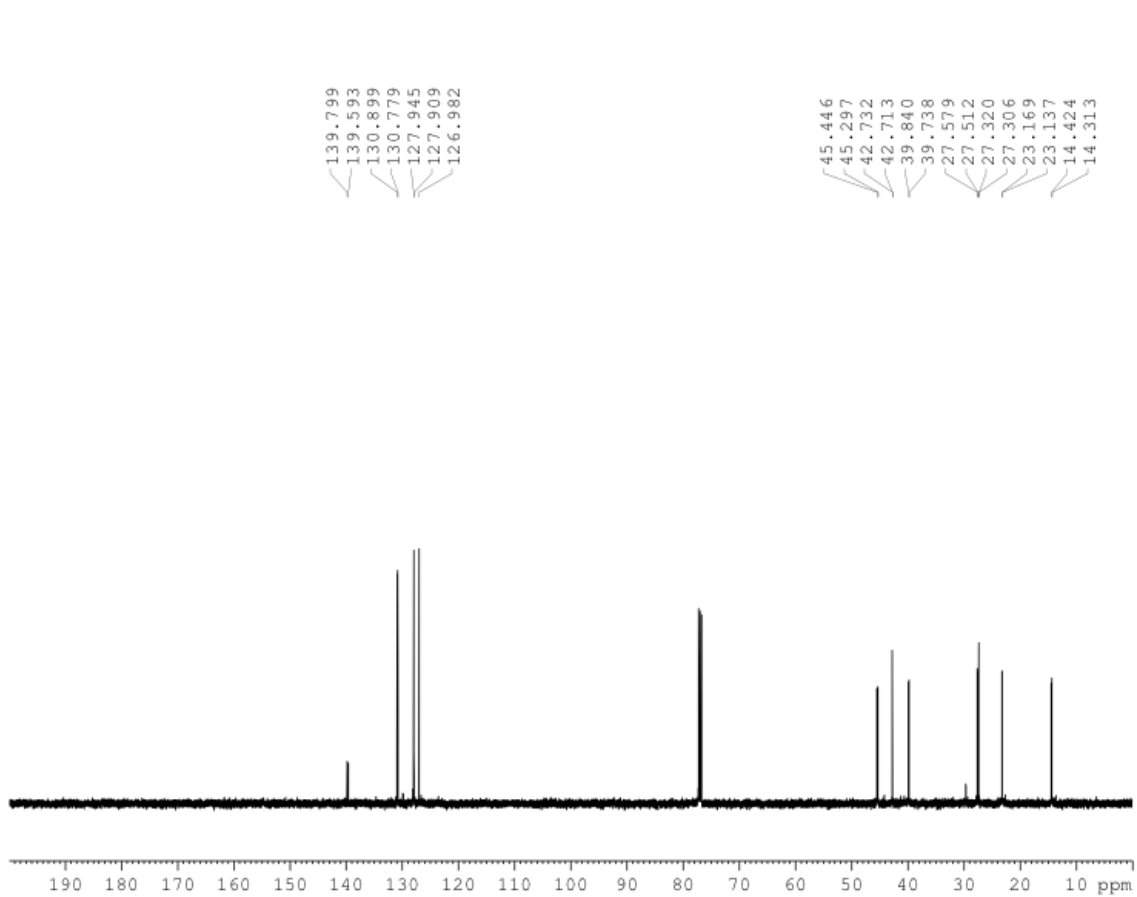

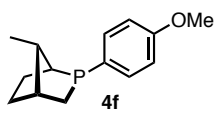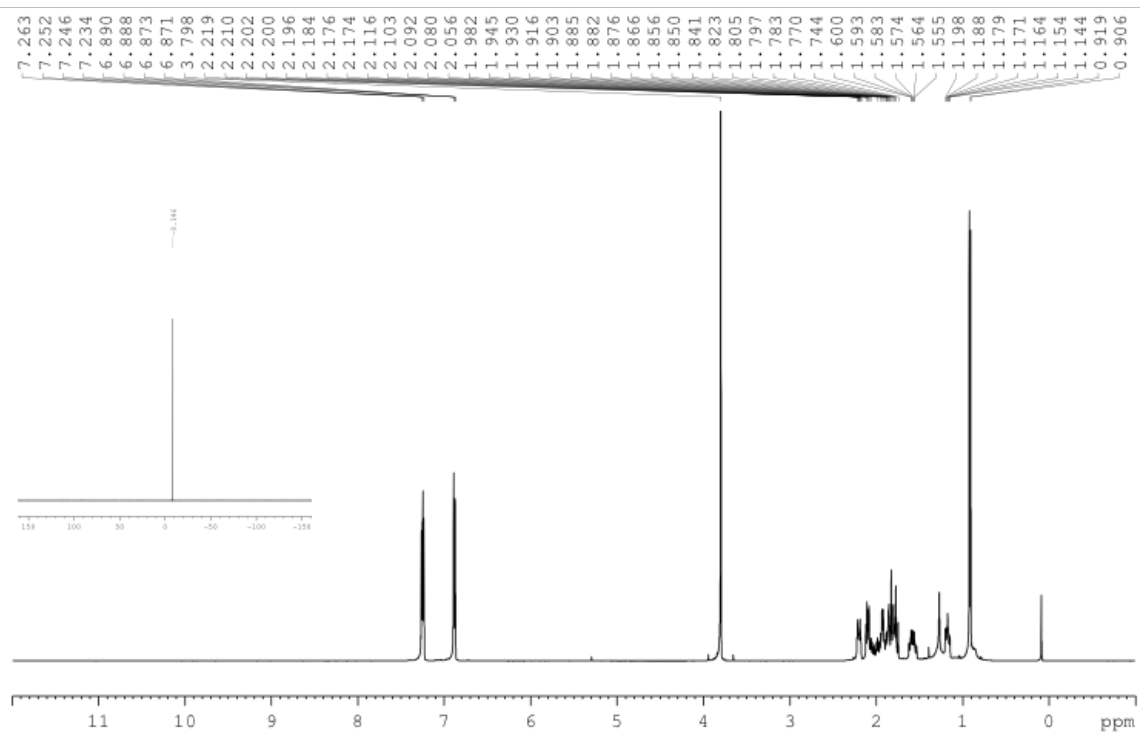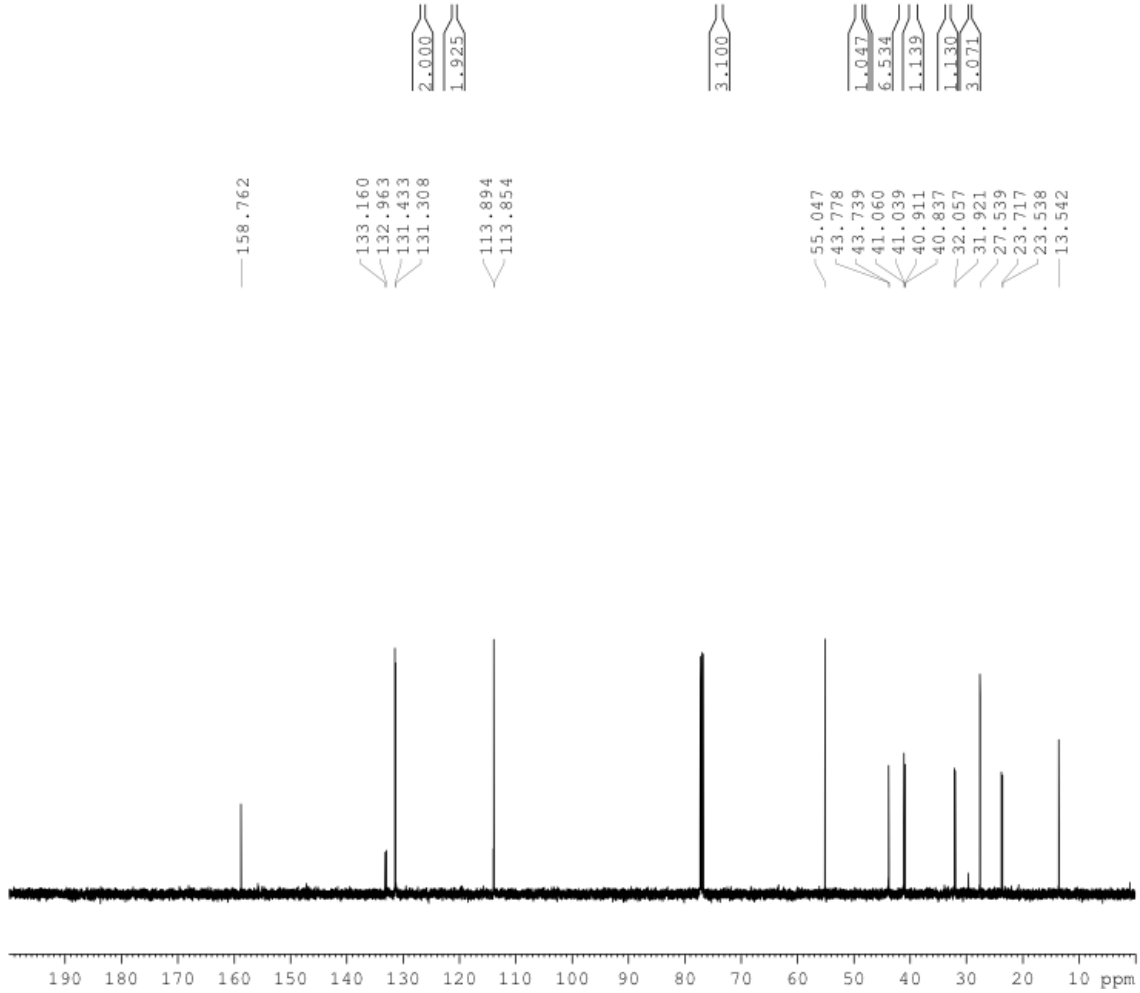



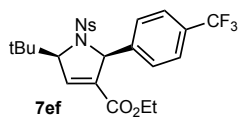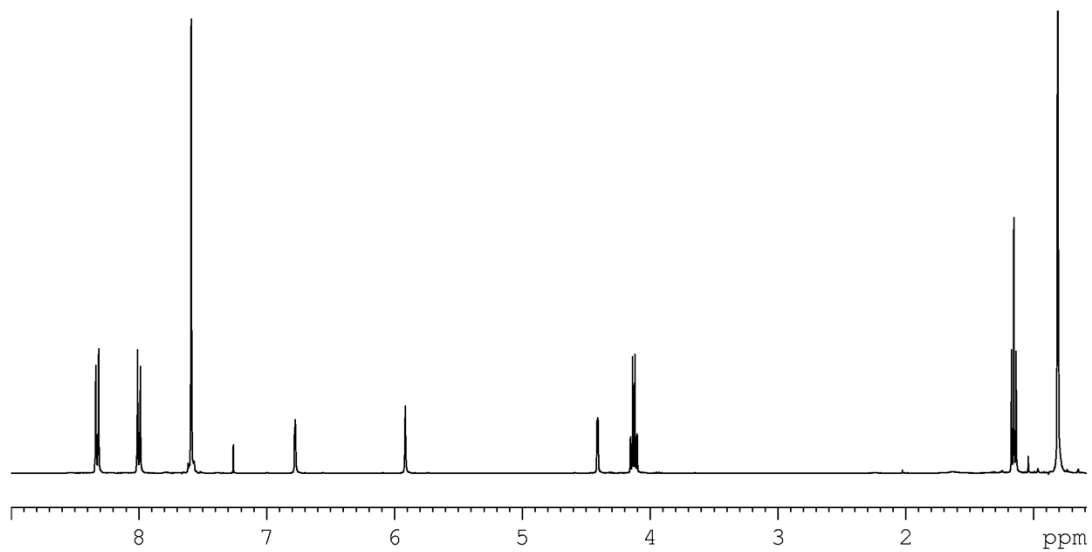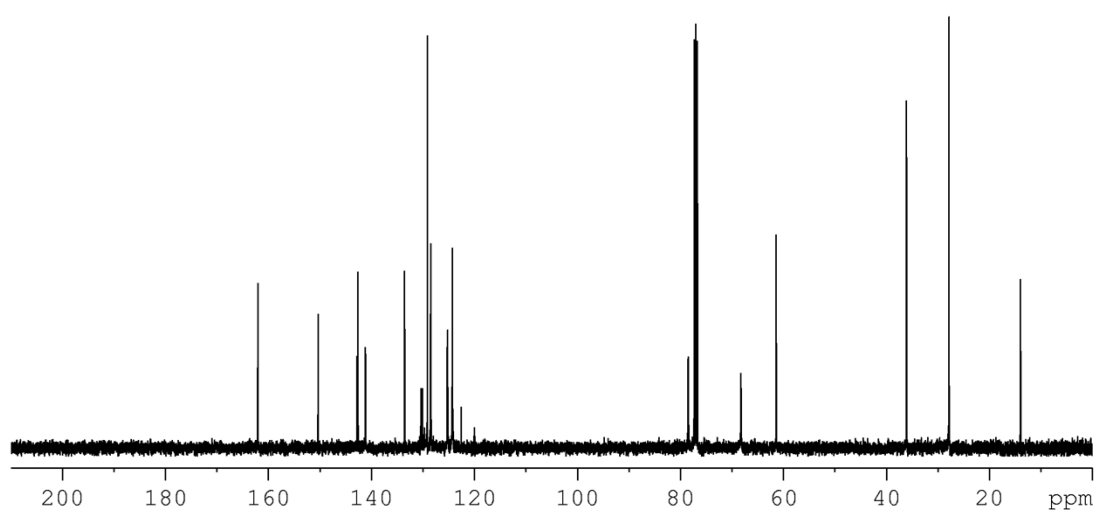

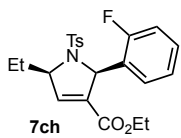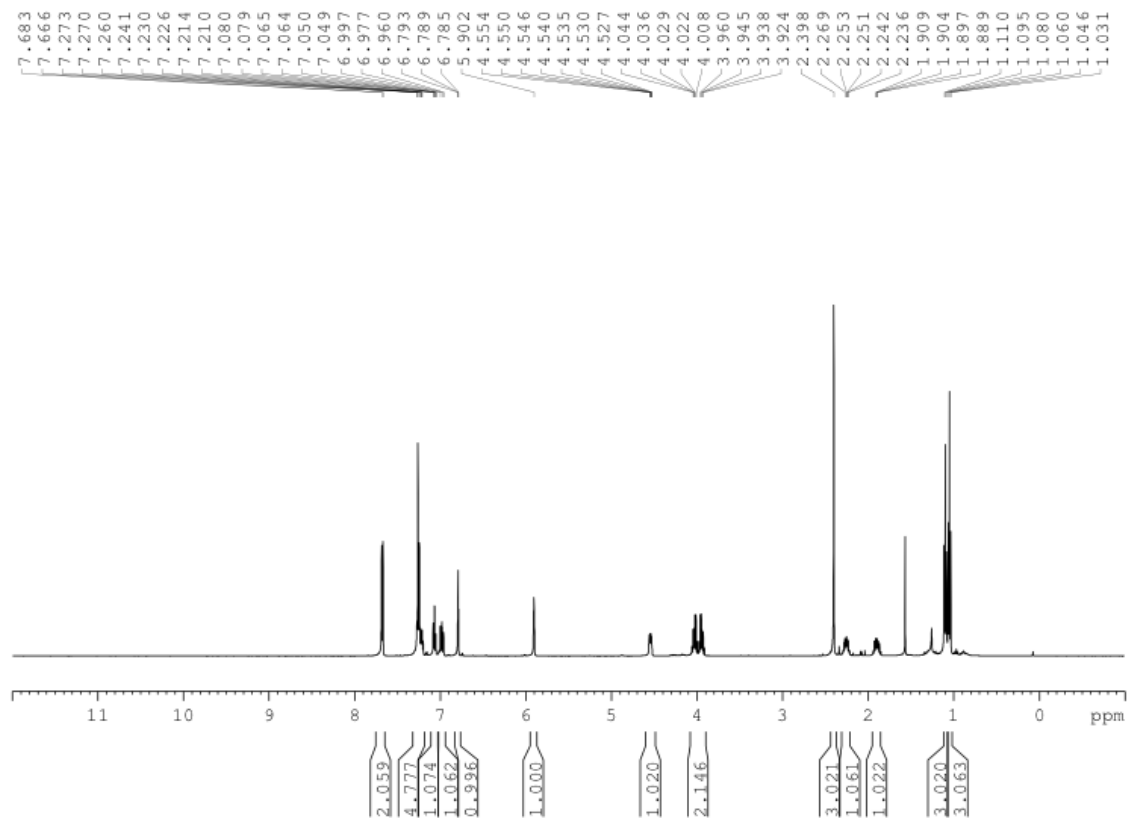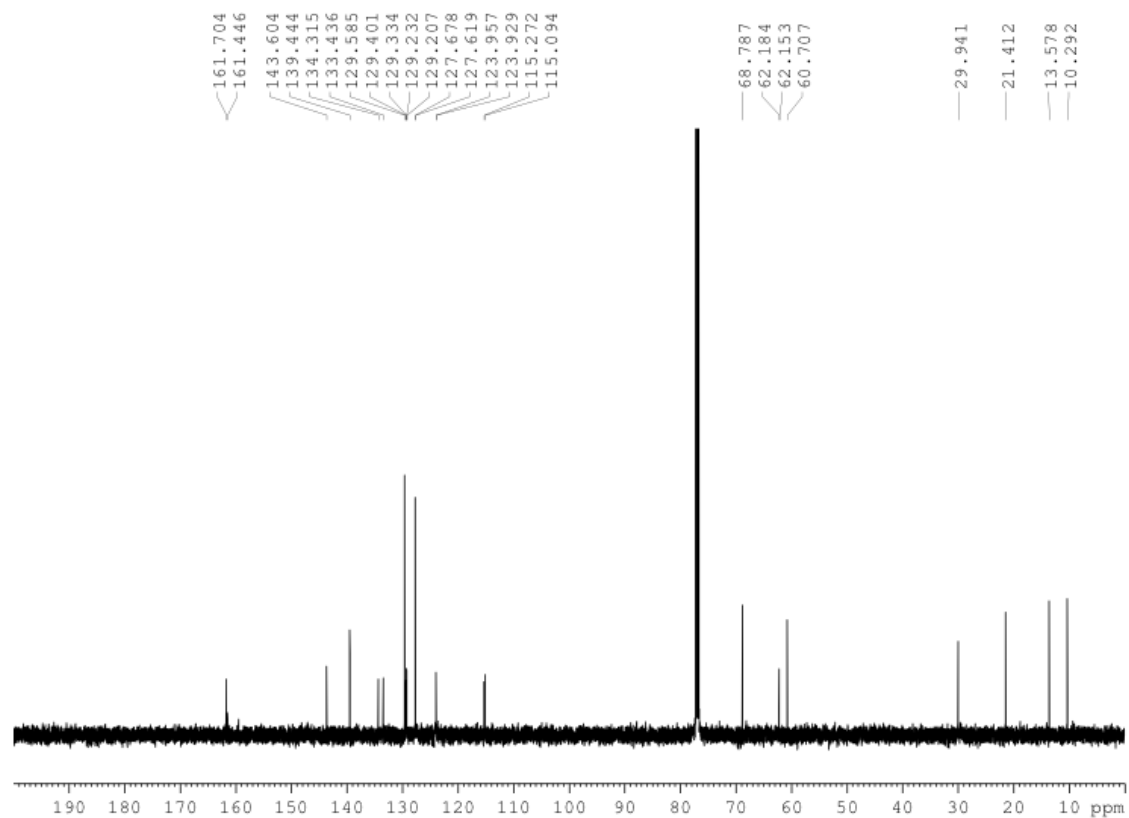

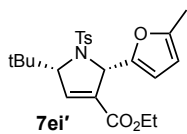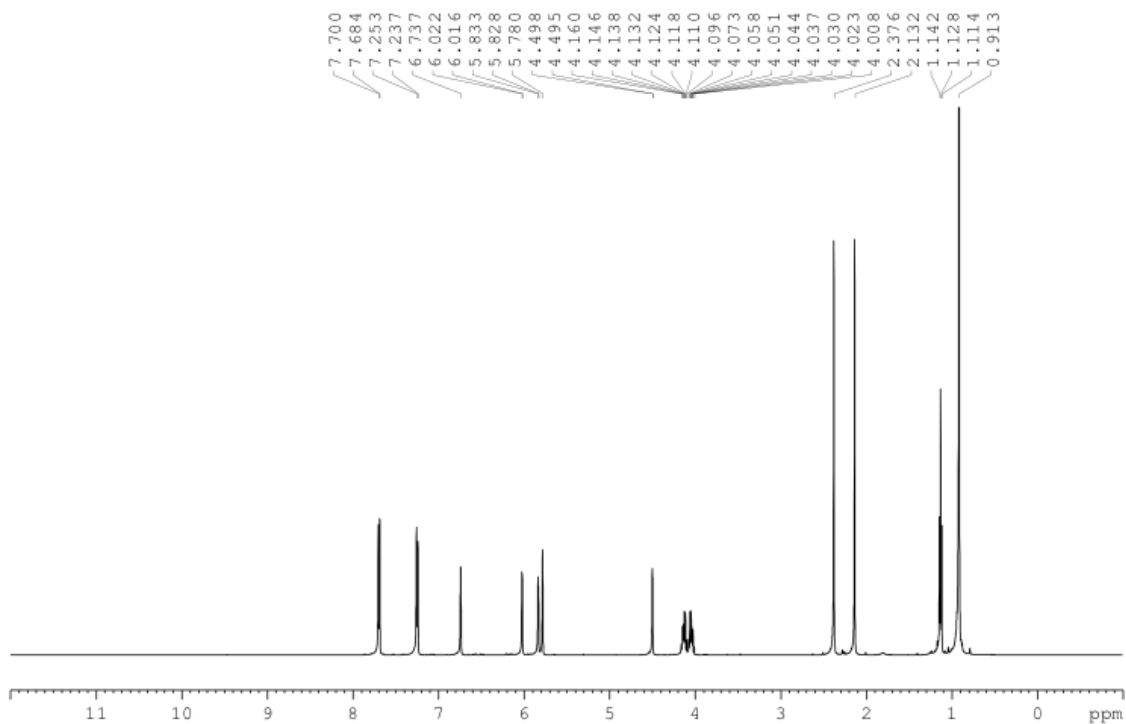

7.700  
 7.684  
 7.253  
 7.237  
 6.737  
 6.022  
 6.016  
 5.833  
 5.828  
 5.780  
 4.498  
 4.495  
 4.160  
 4.146  
 4.138  
 4.132  
 4.124  
 4.118  
 4.110  
 4.096  
 4.073  
 4.058  
 4.051  
 4.044  
 4.037  
 4.030  
 4.023  
 4.008  
 2.376  
 2.132  
 1.142  
 1.128  
 1.114  
 0.913

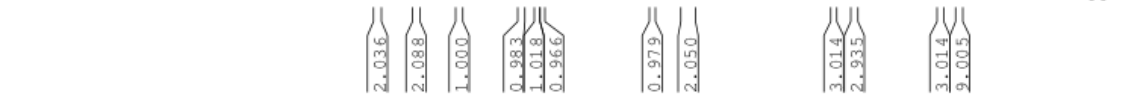

162.017  
 151.254  
 150.041  
 143.688  
 140.565  
 134.942  
 132.050  
 129.480  
 127.941  
 109.472  
 106.322  
 63.423  
 60.620  
 36.223  
 27.486  
 21.396  
 13.899  
 13.347

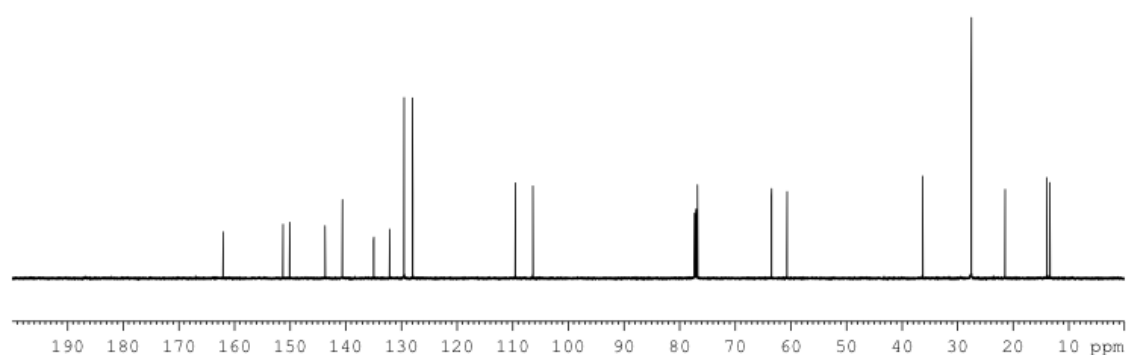

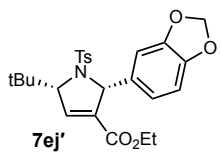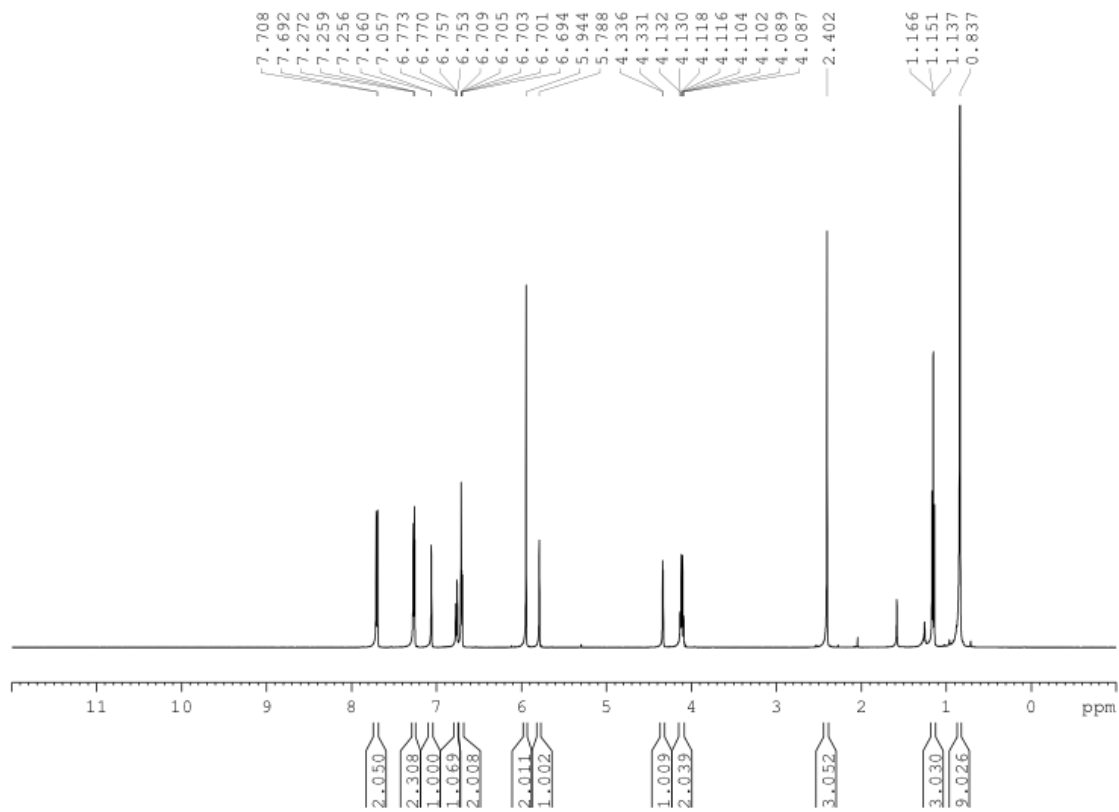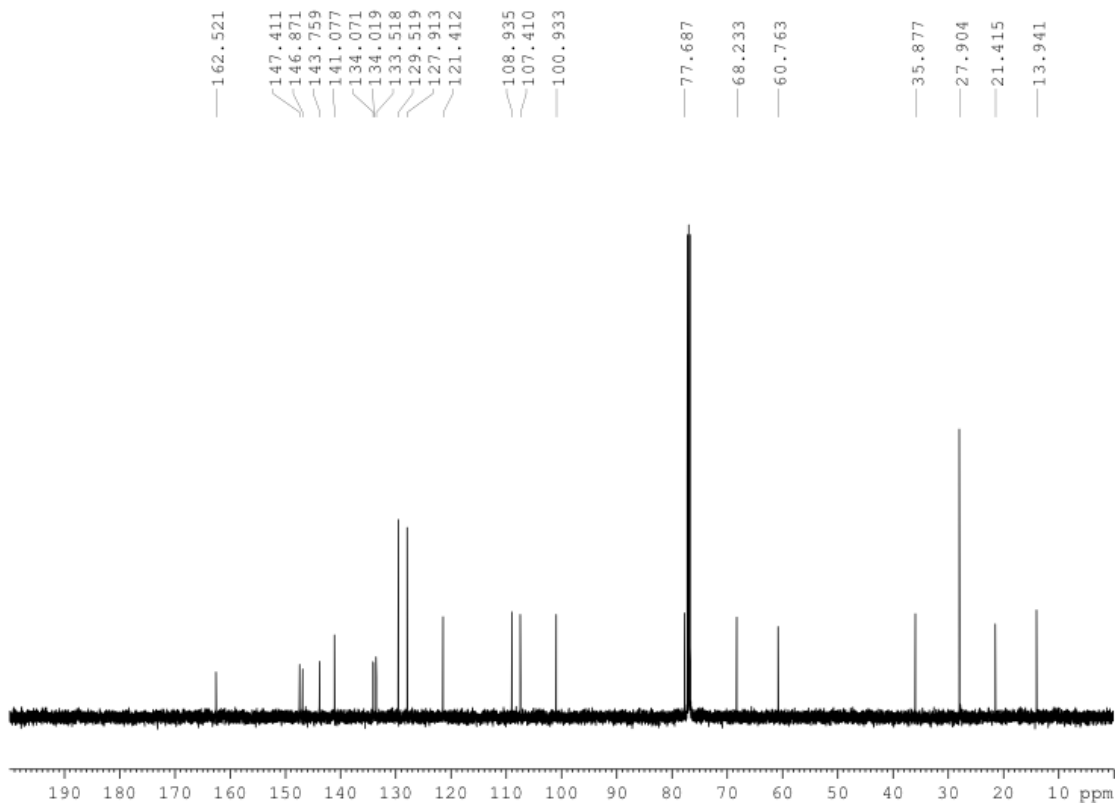

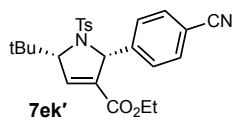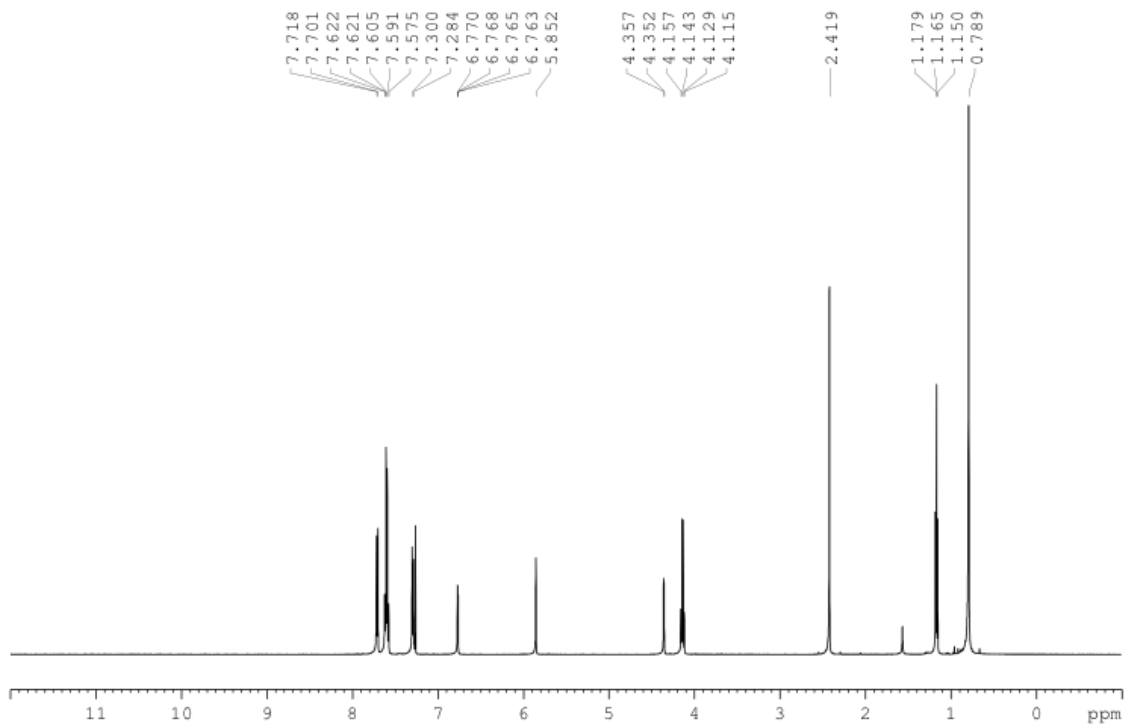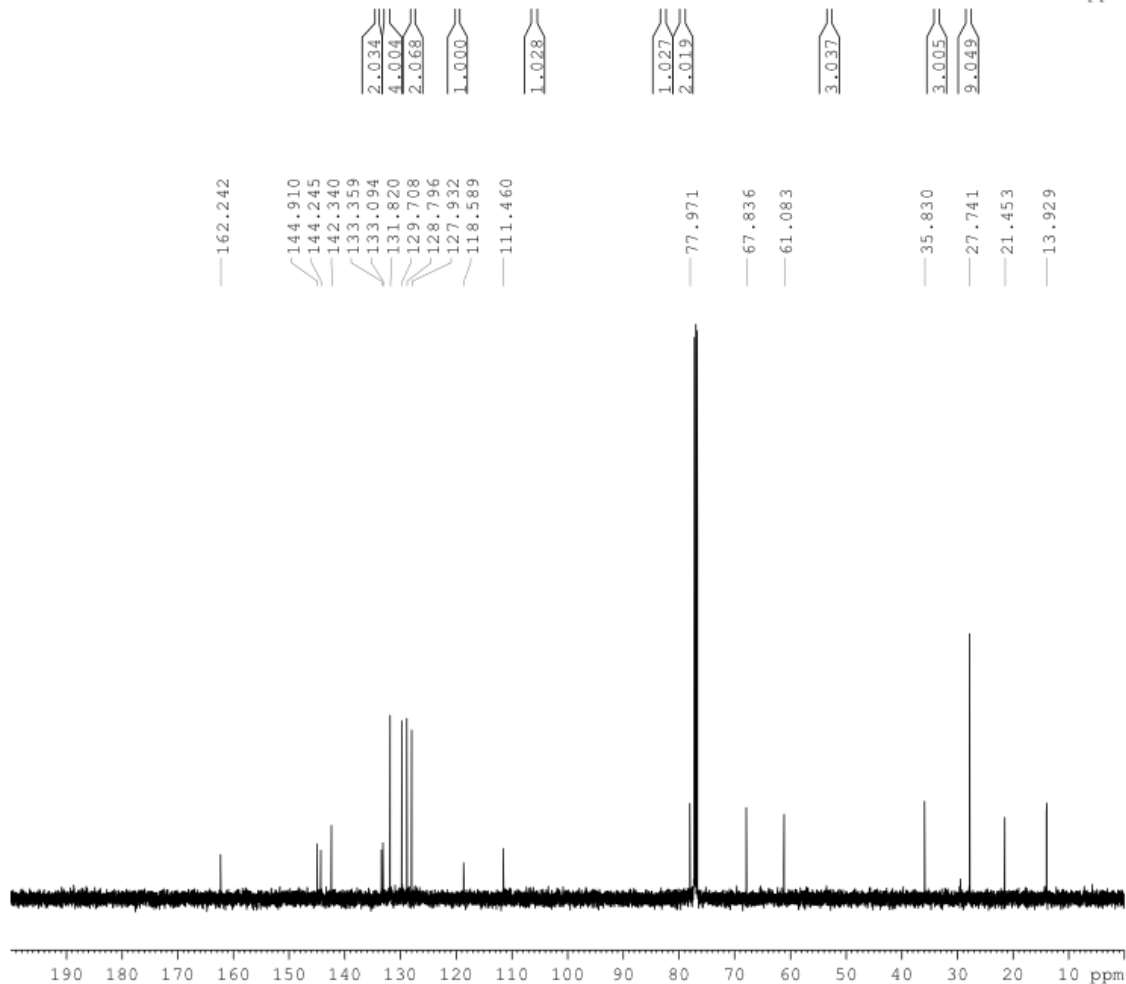



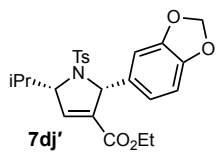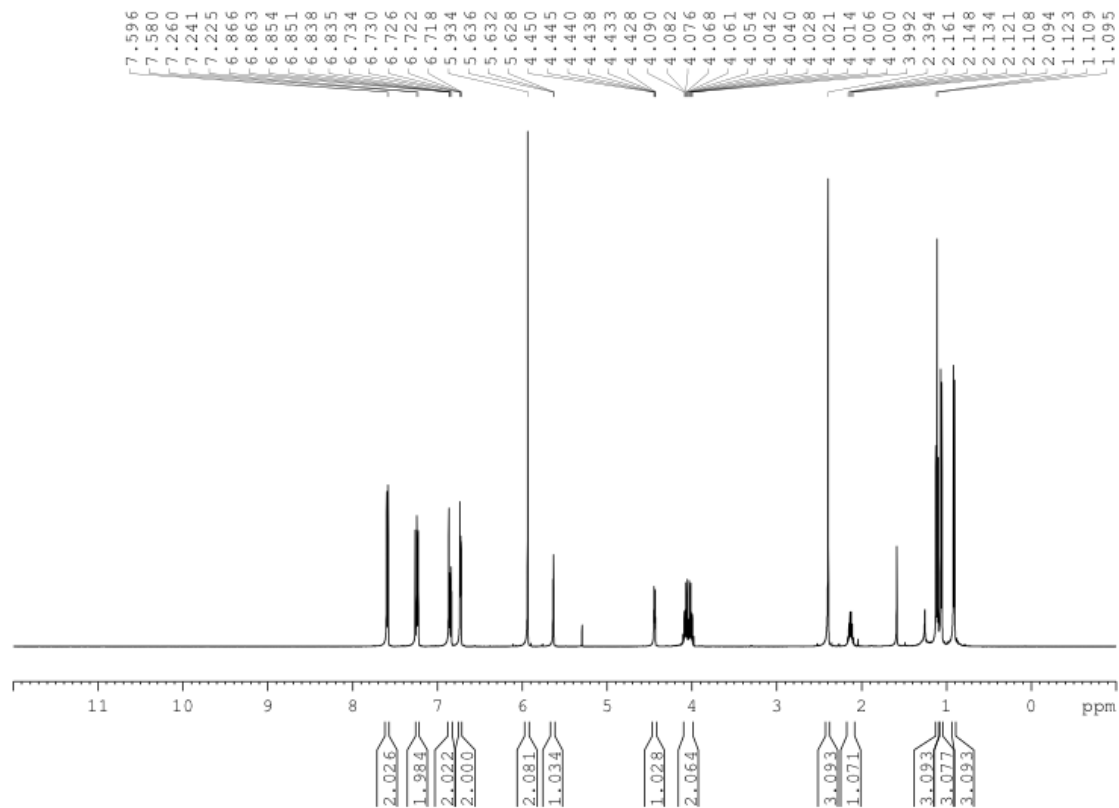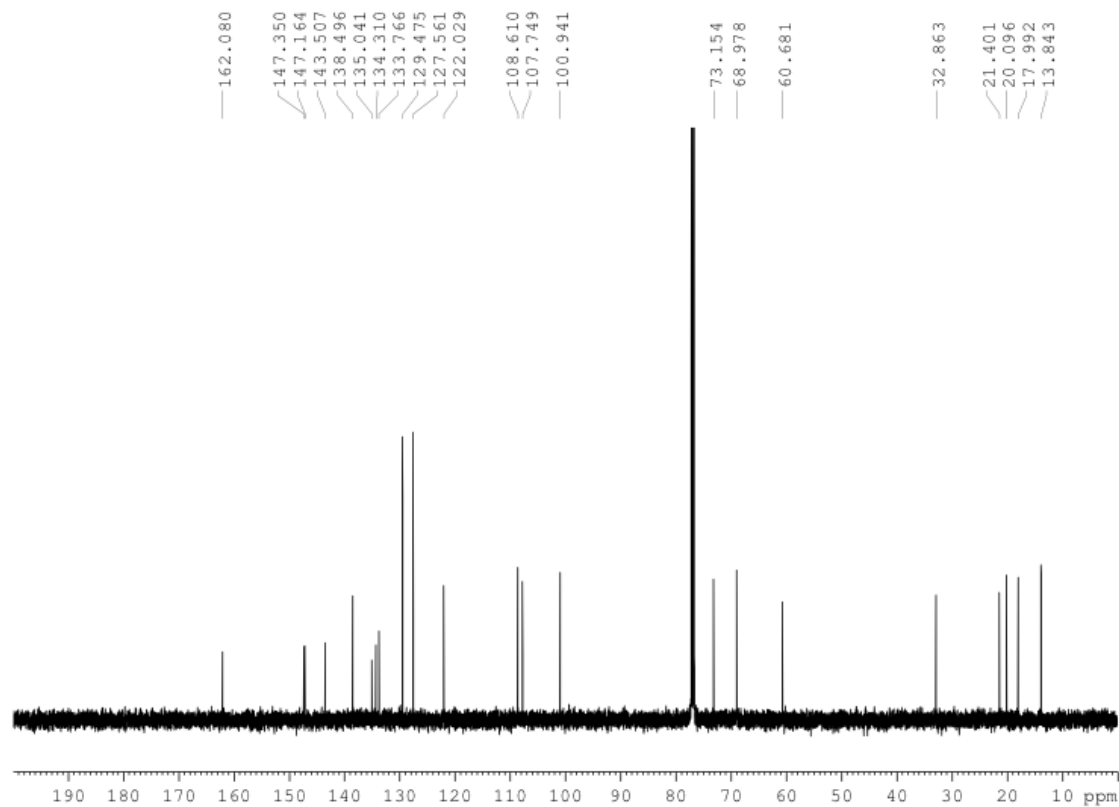

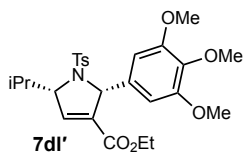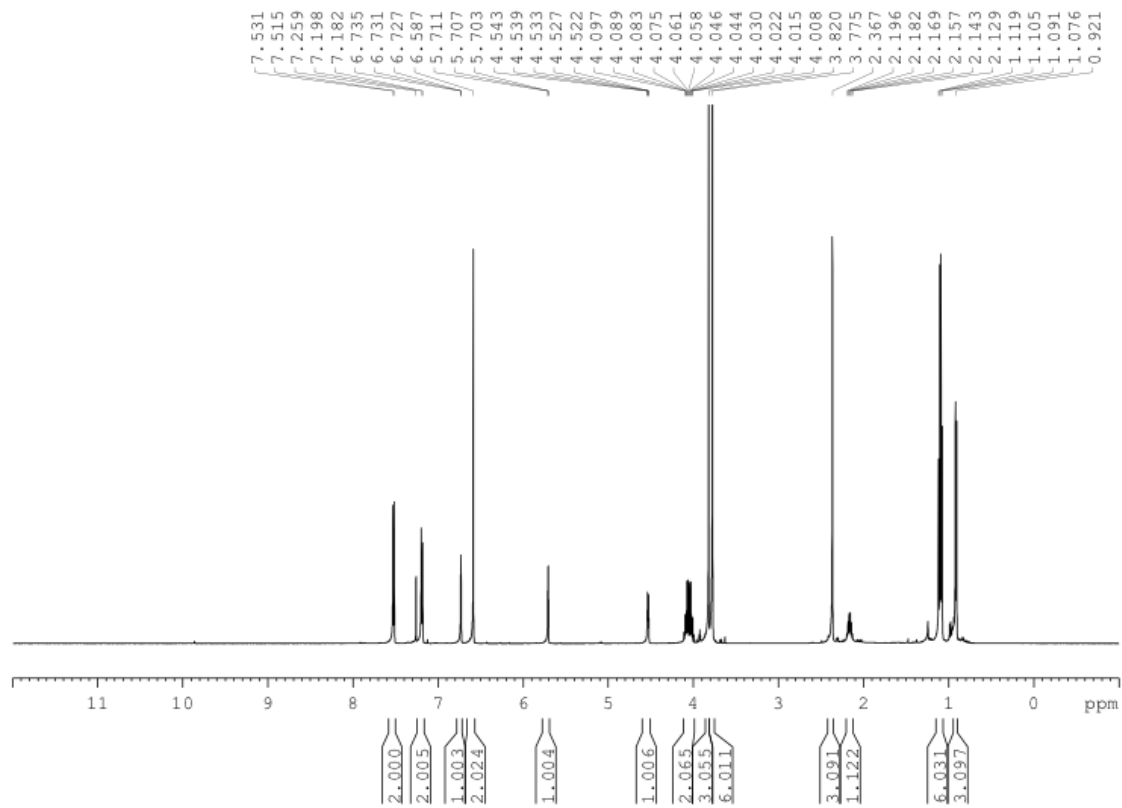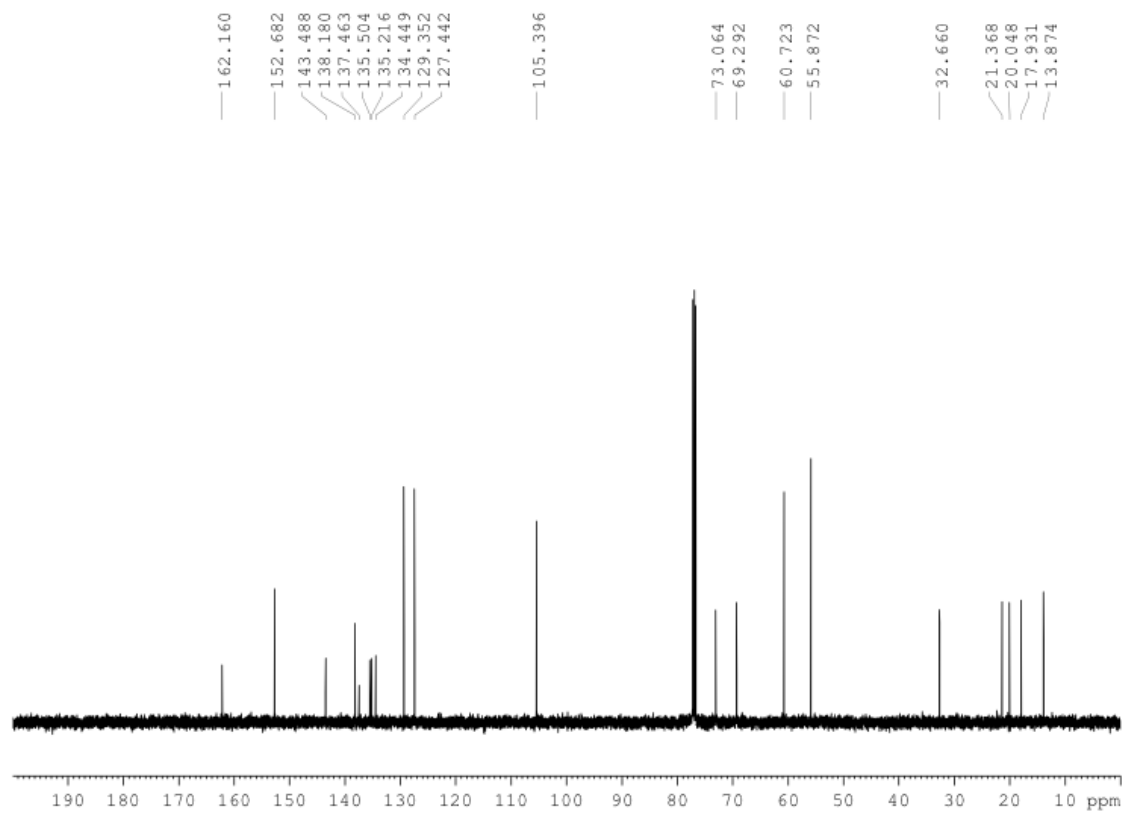

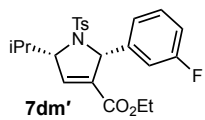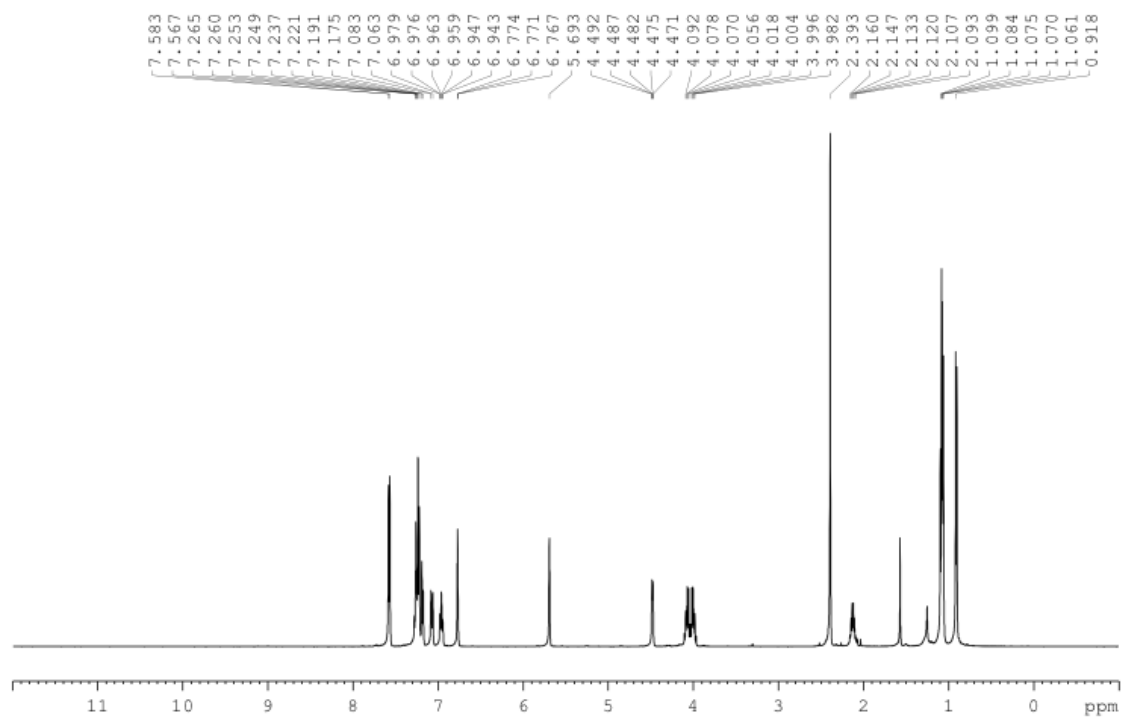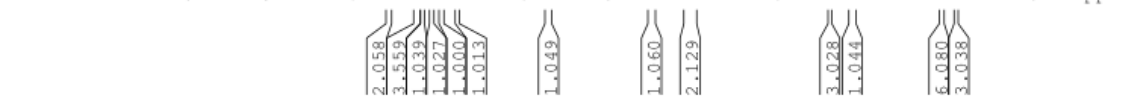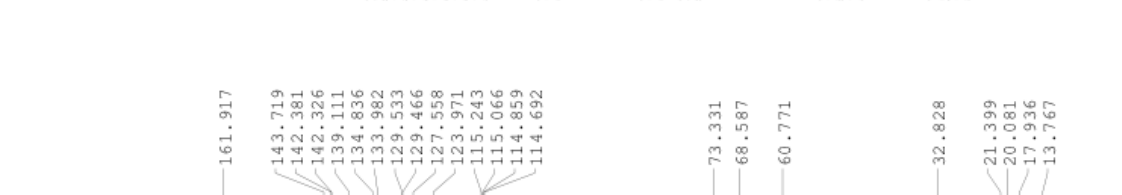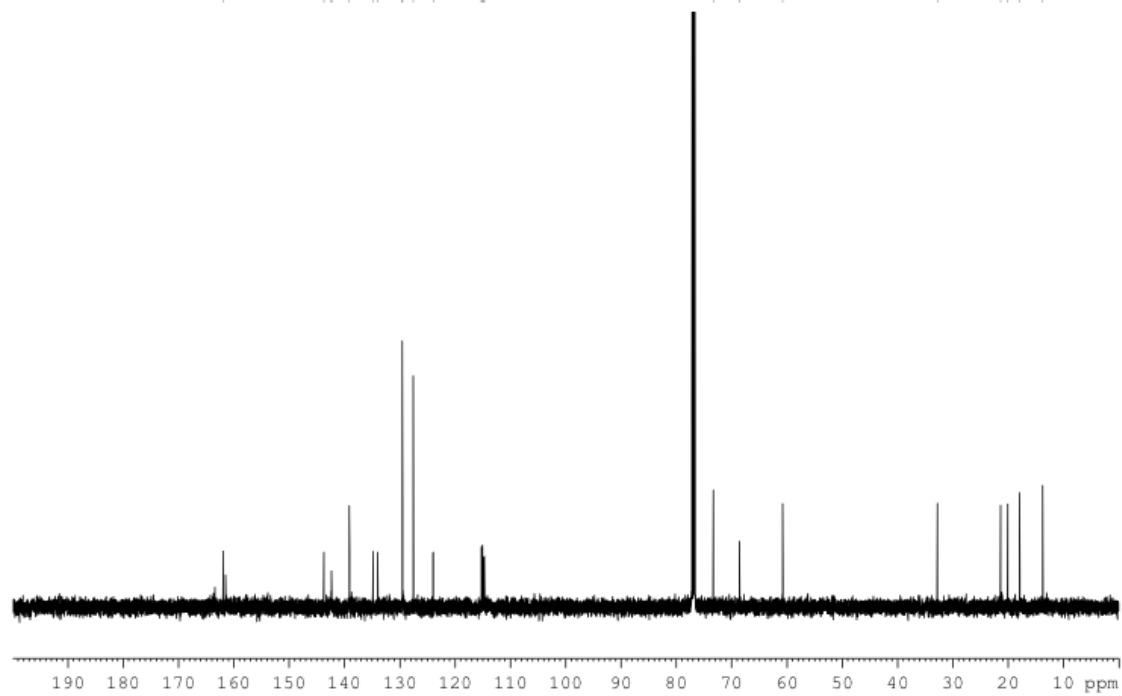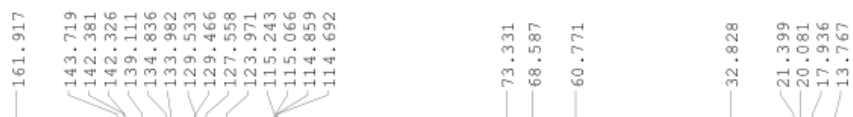

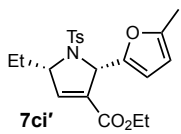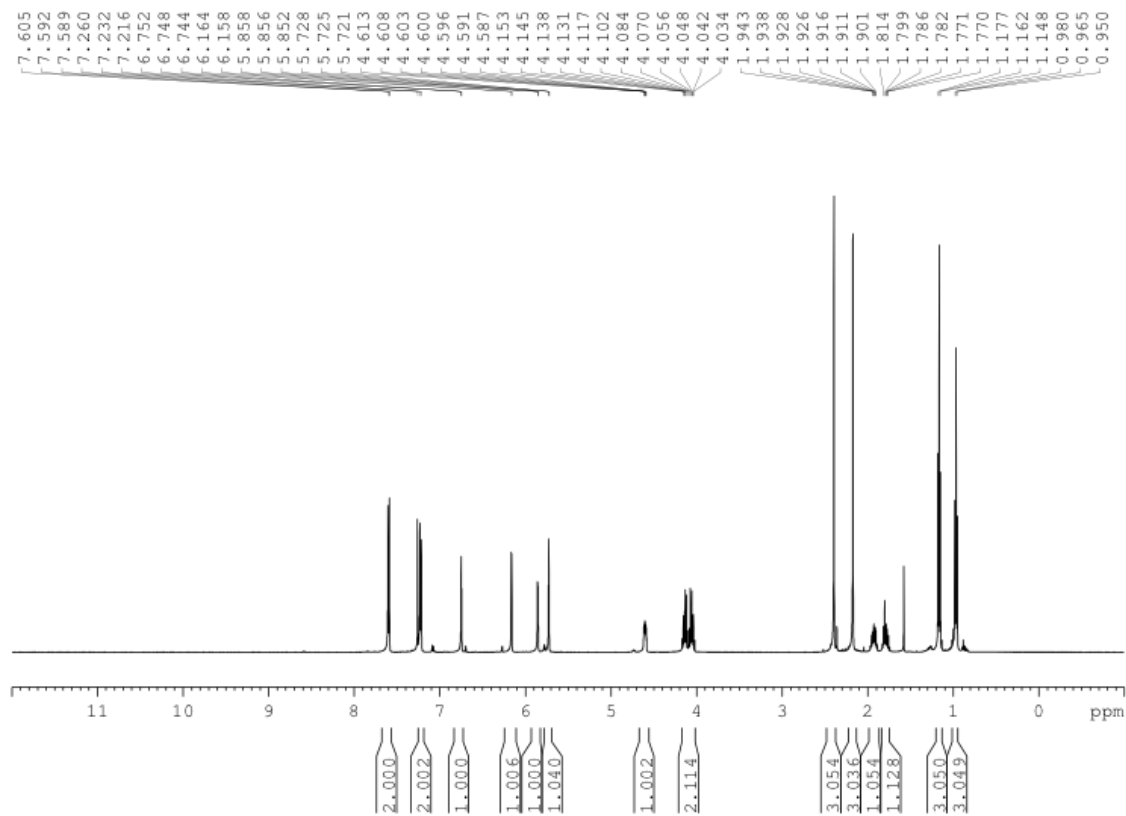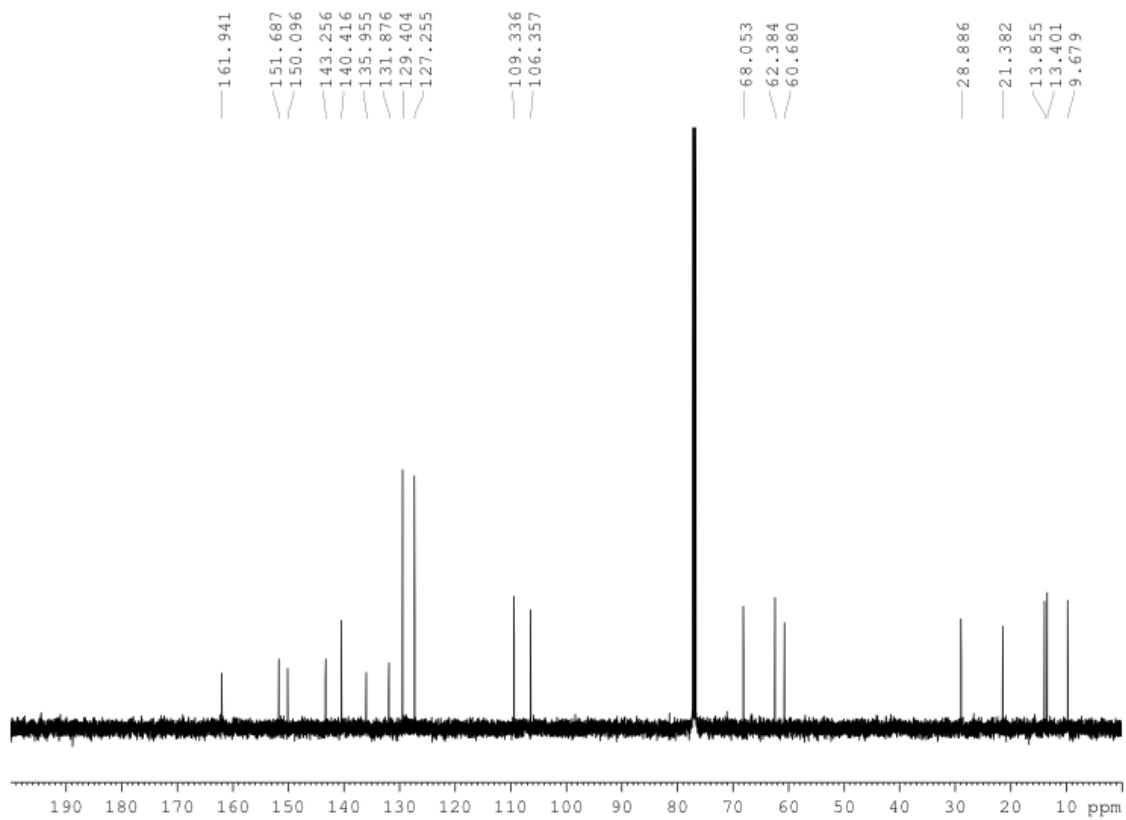

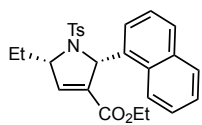

7cn'

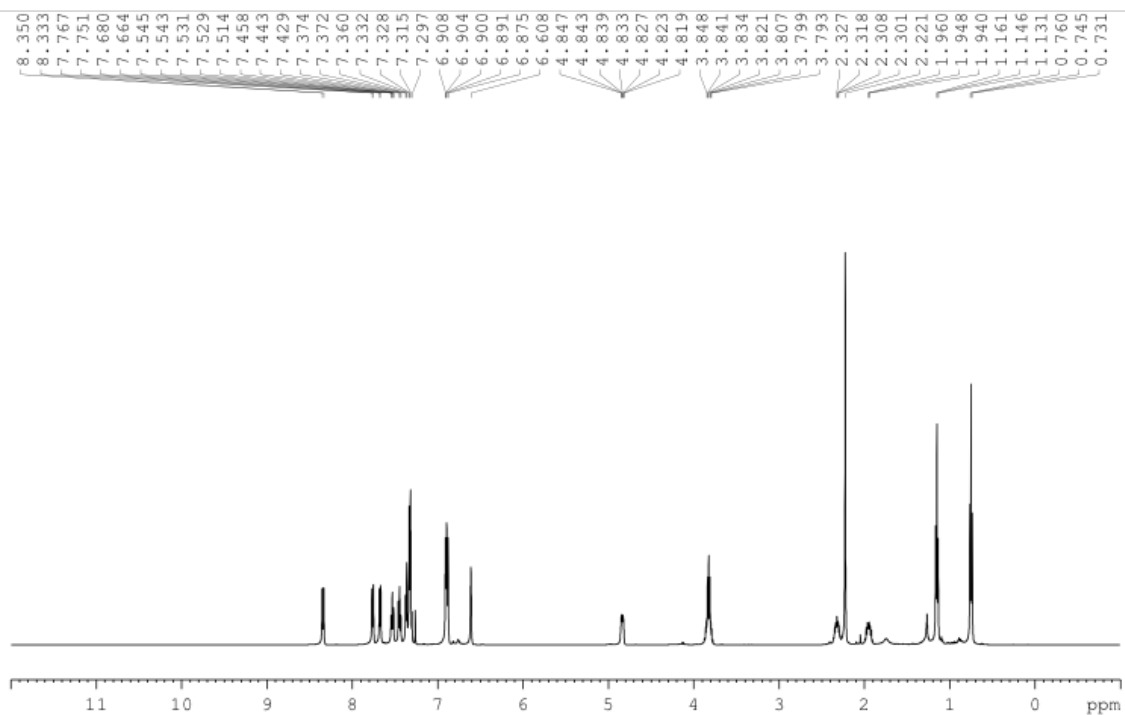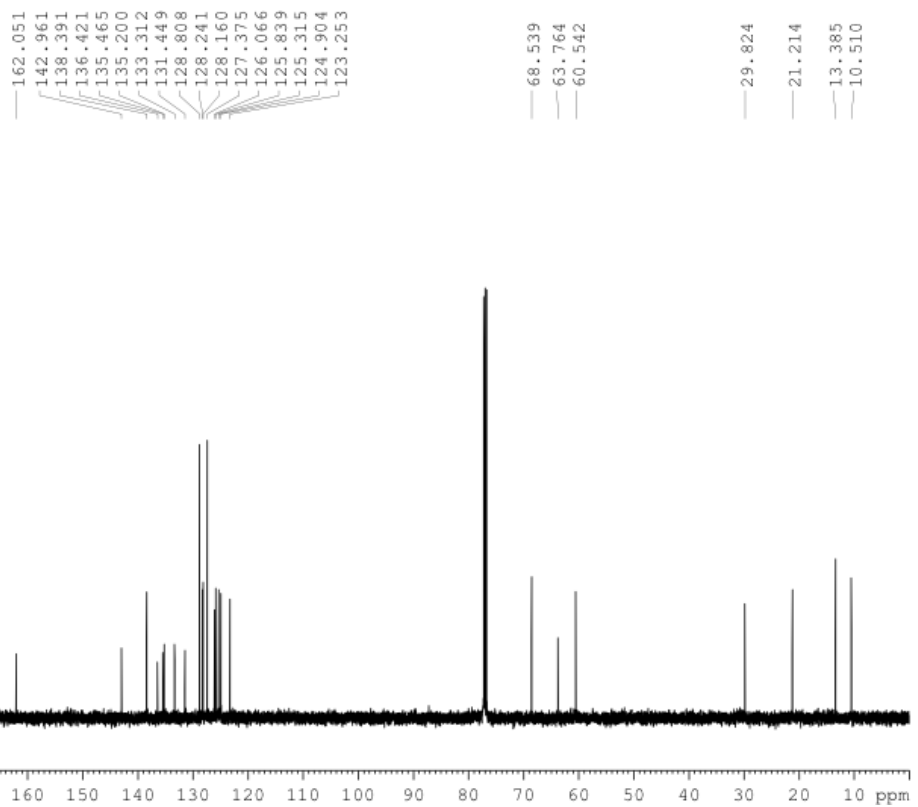

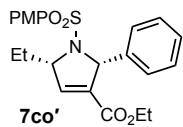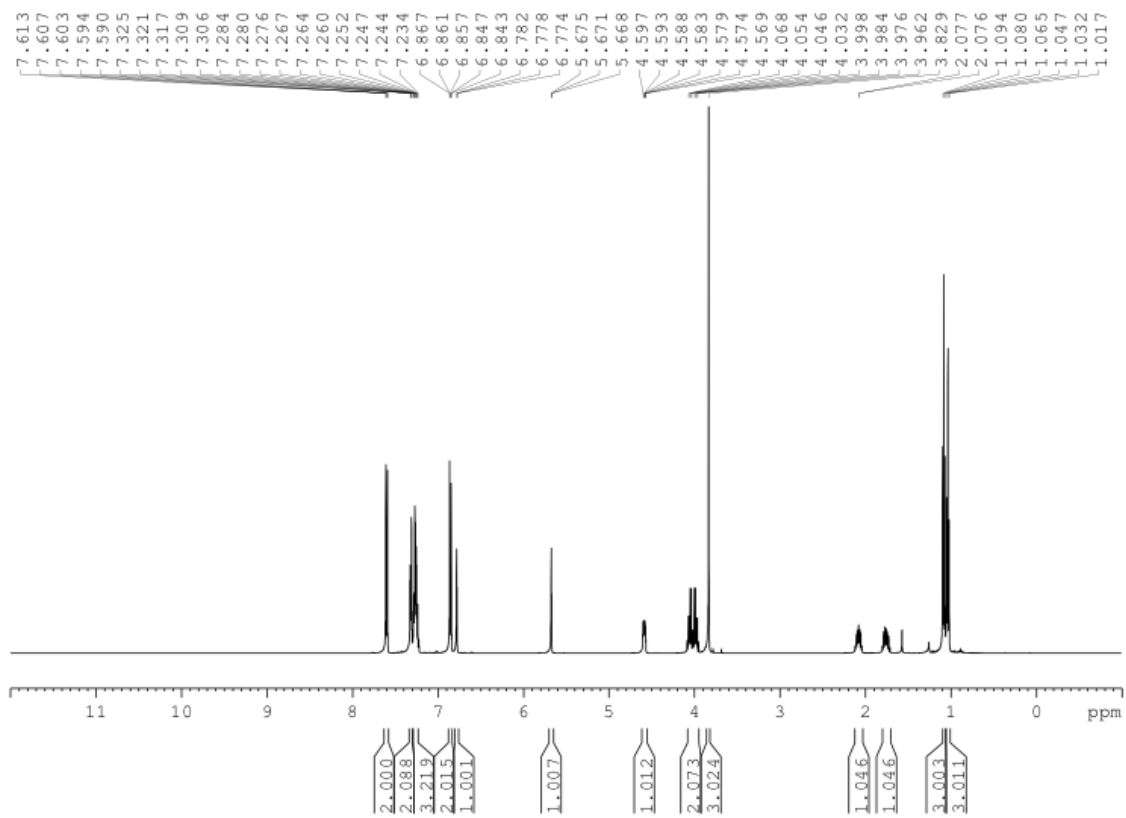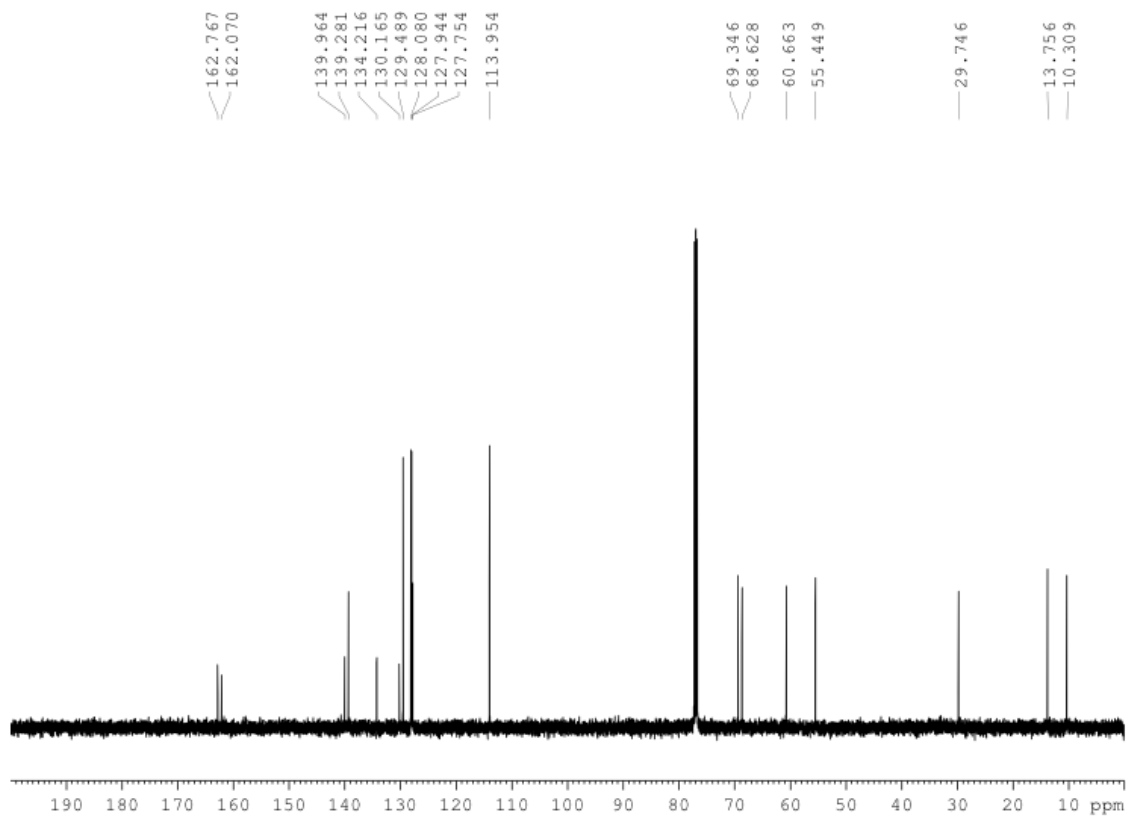

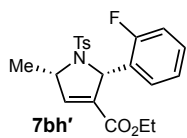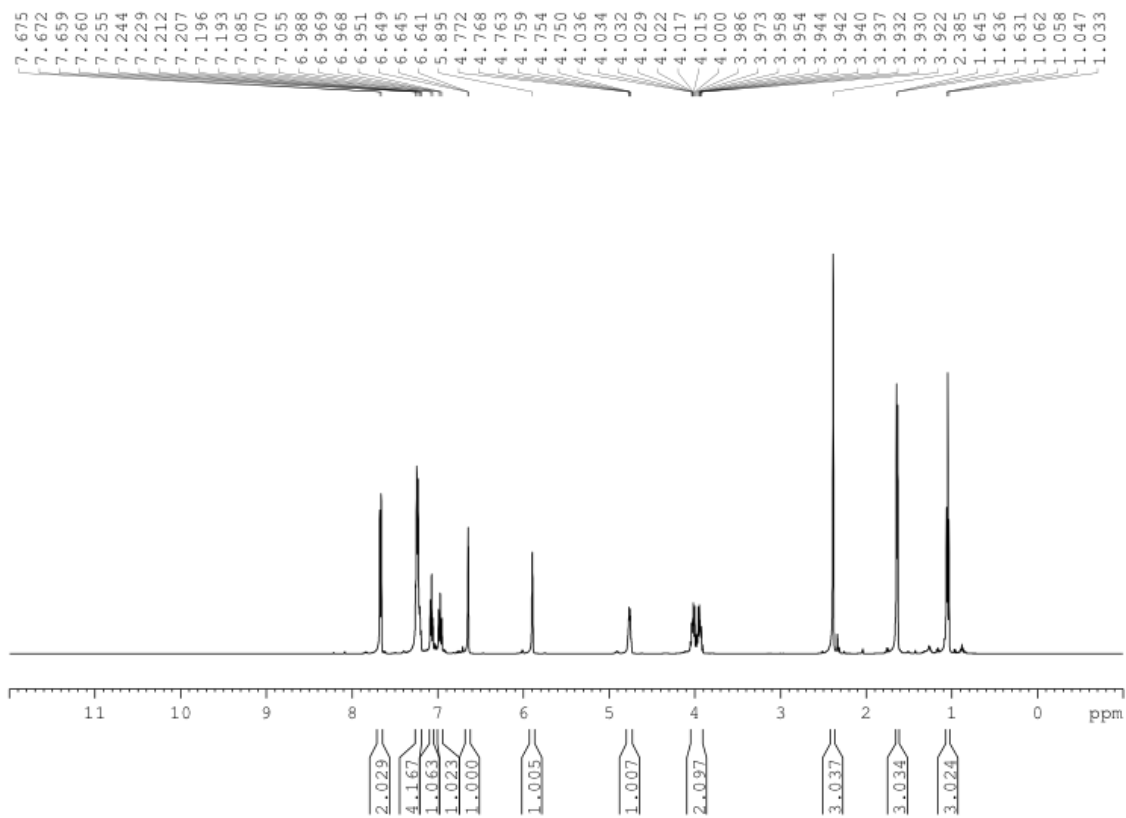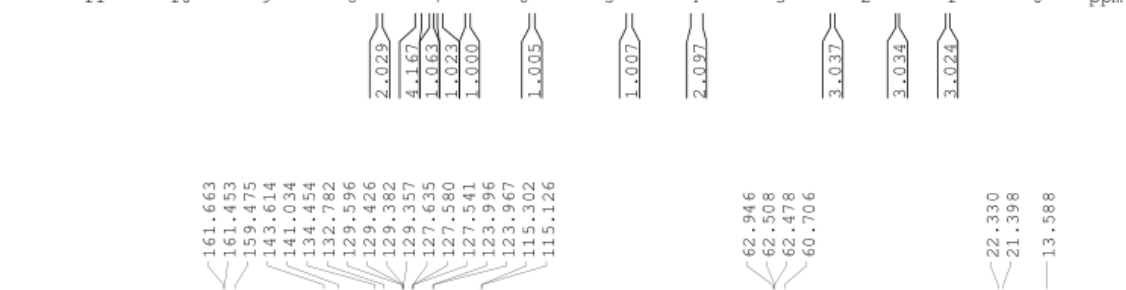

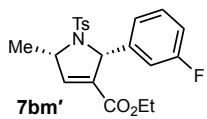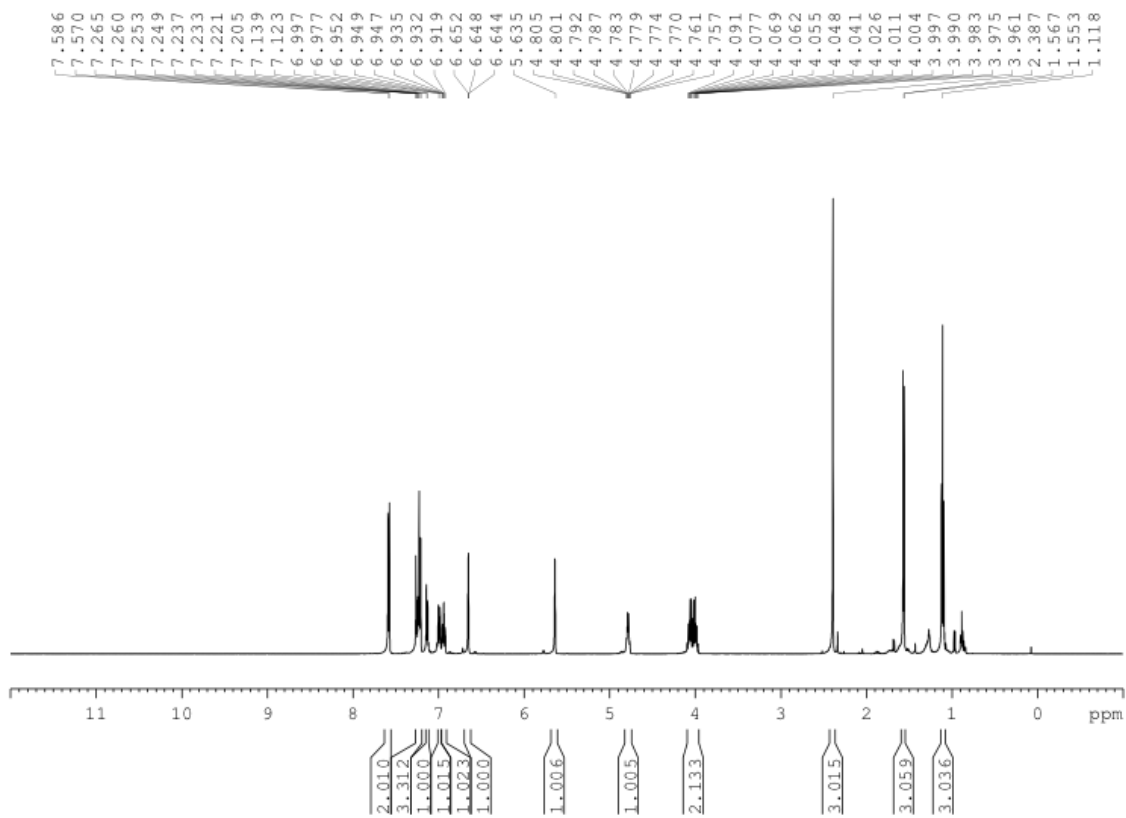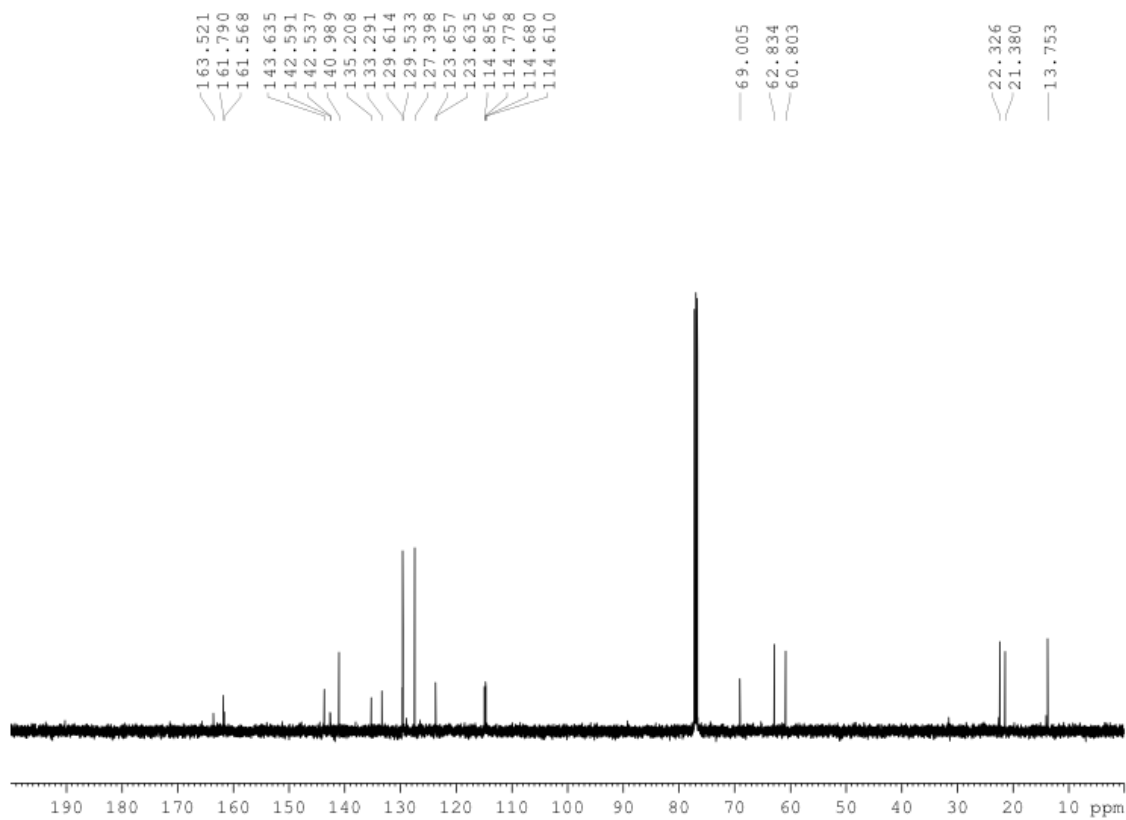



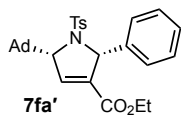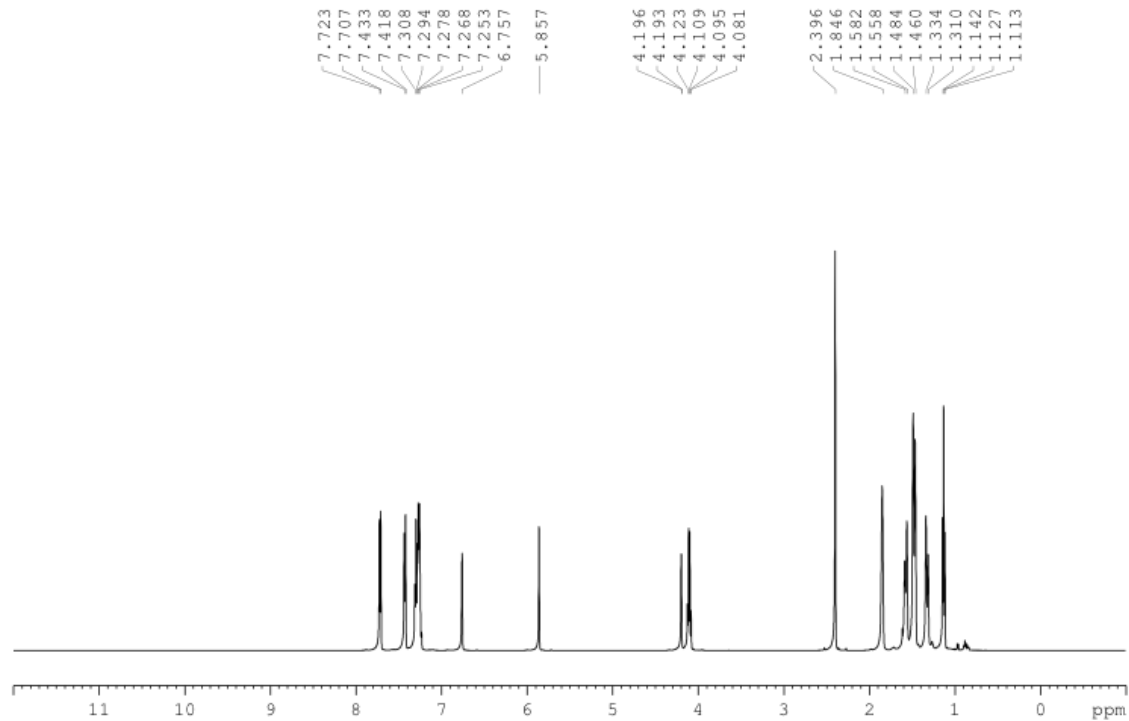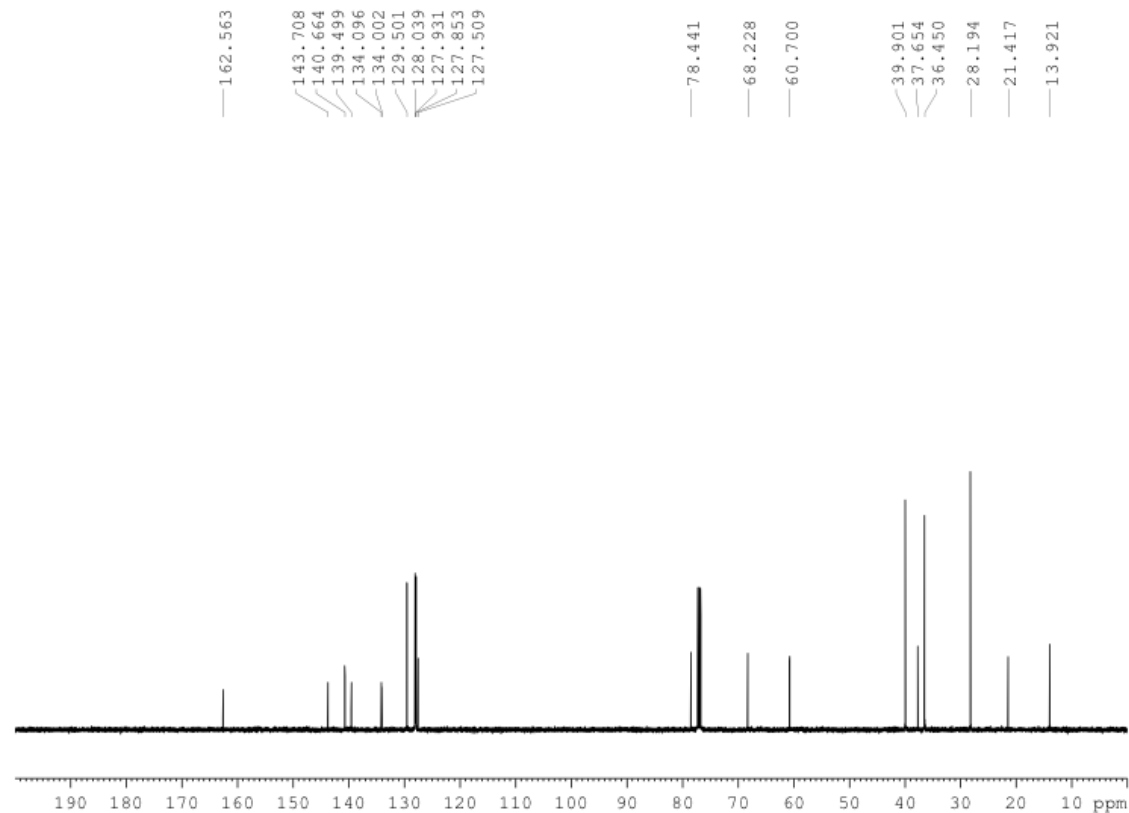

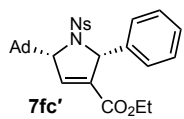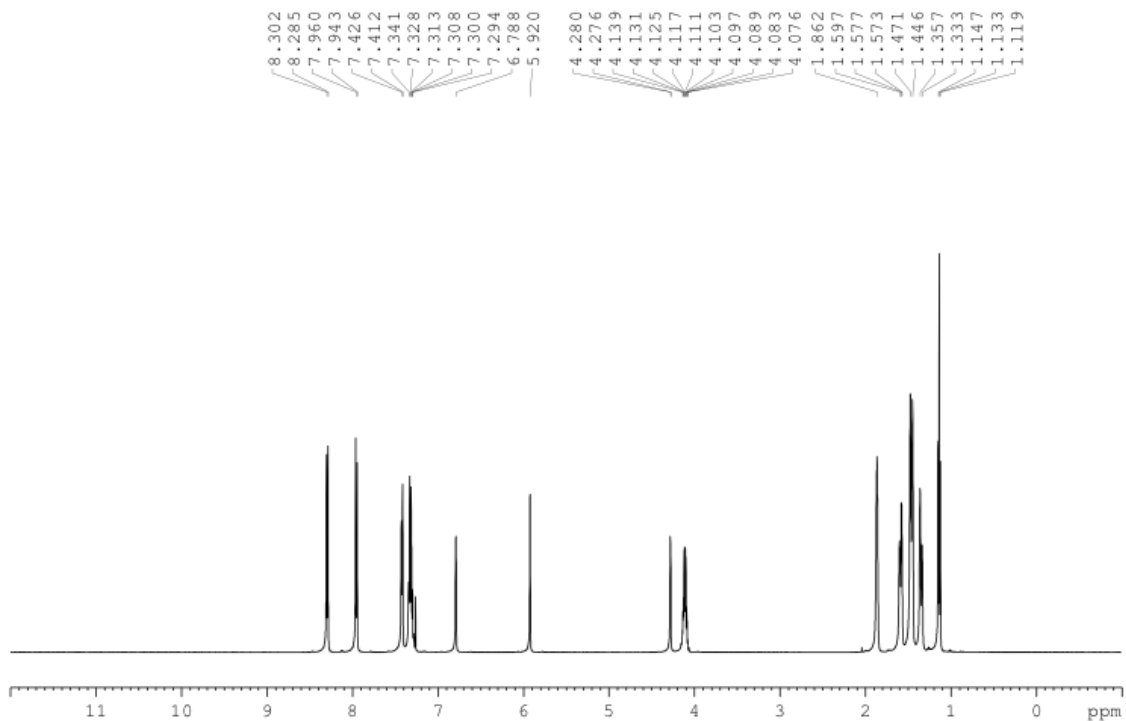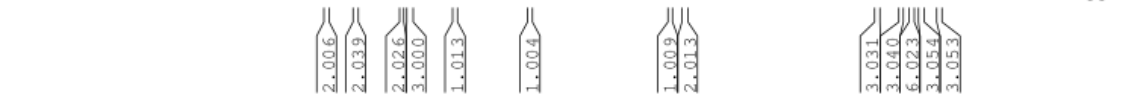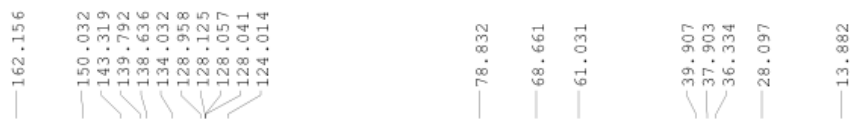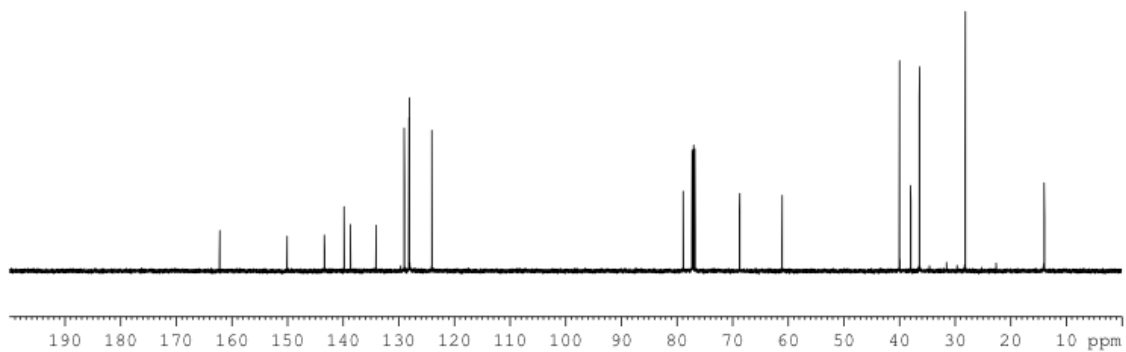

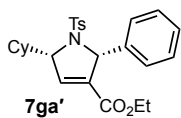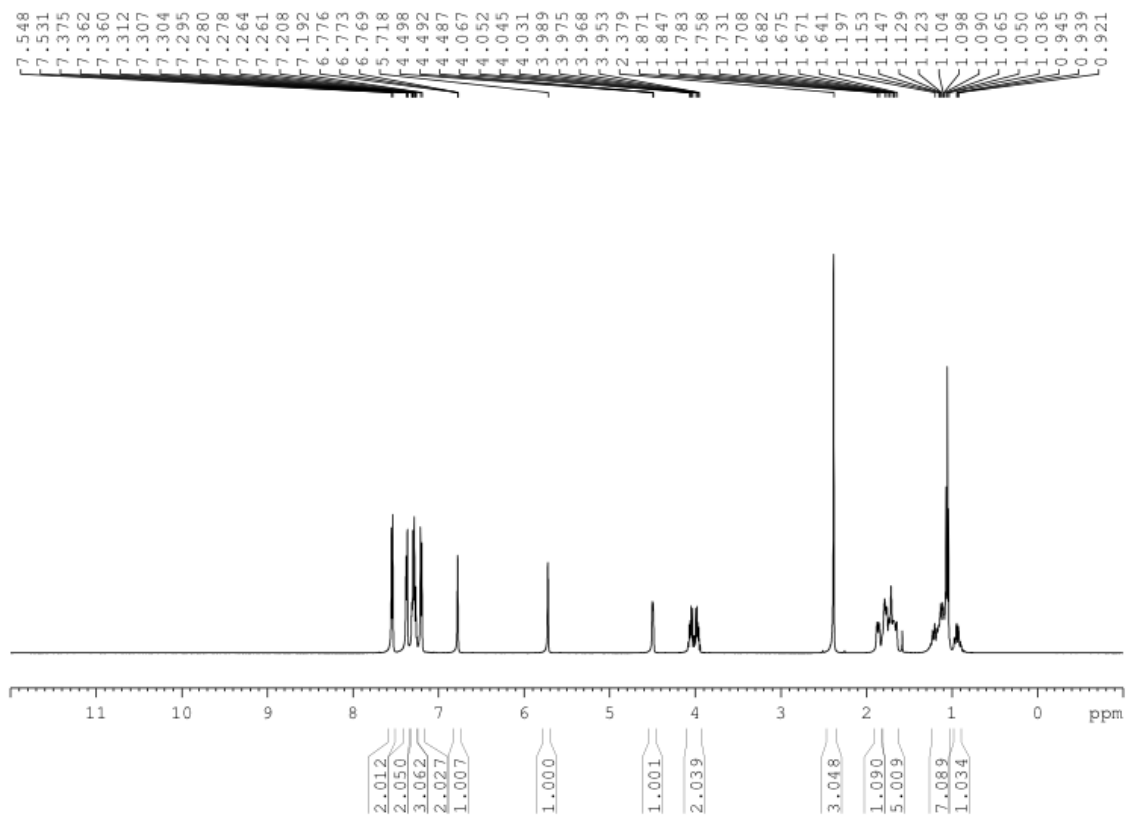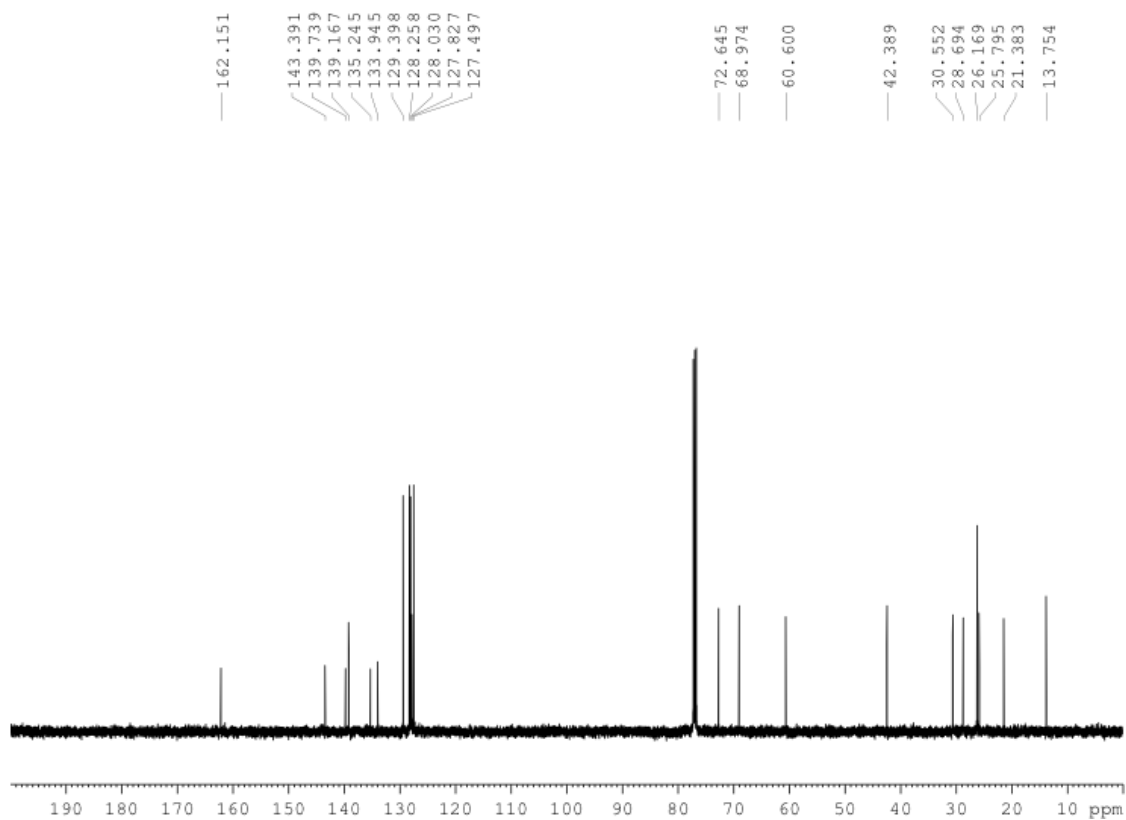

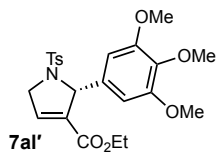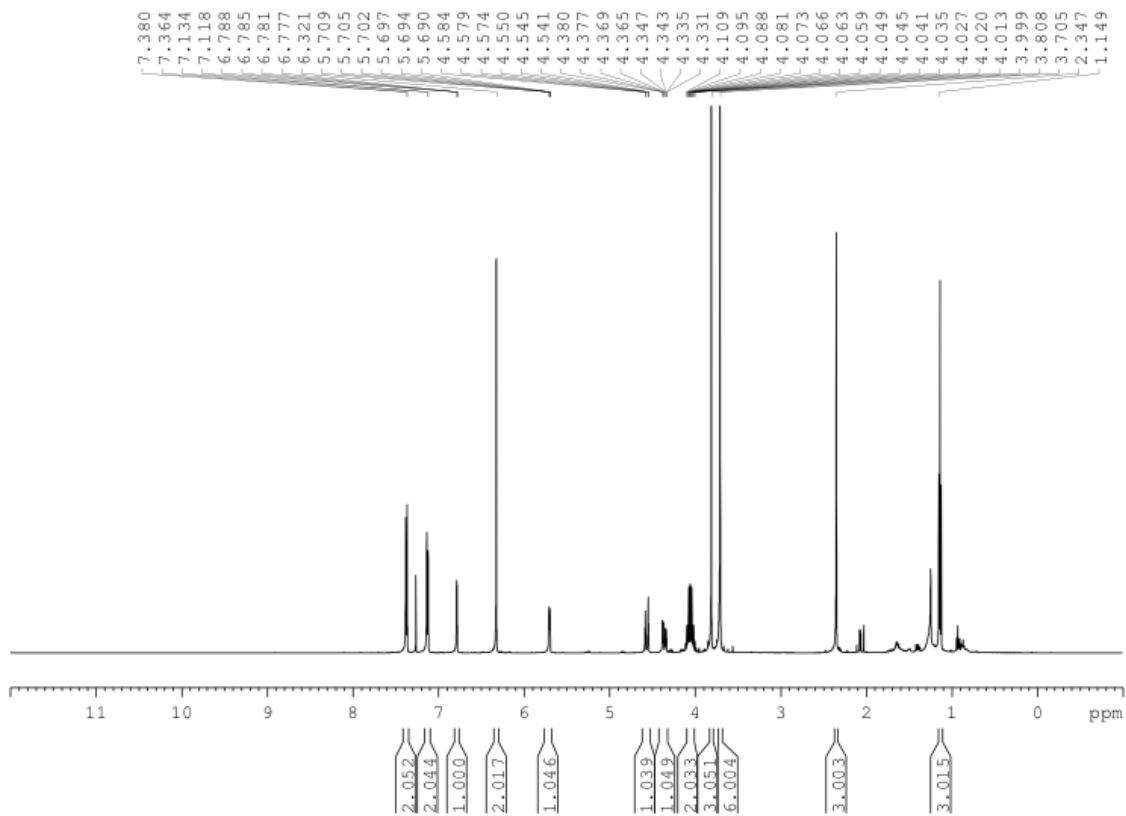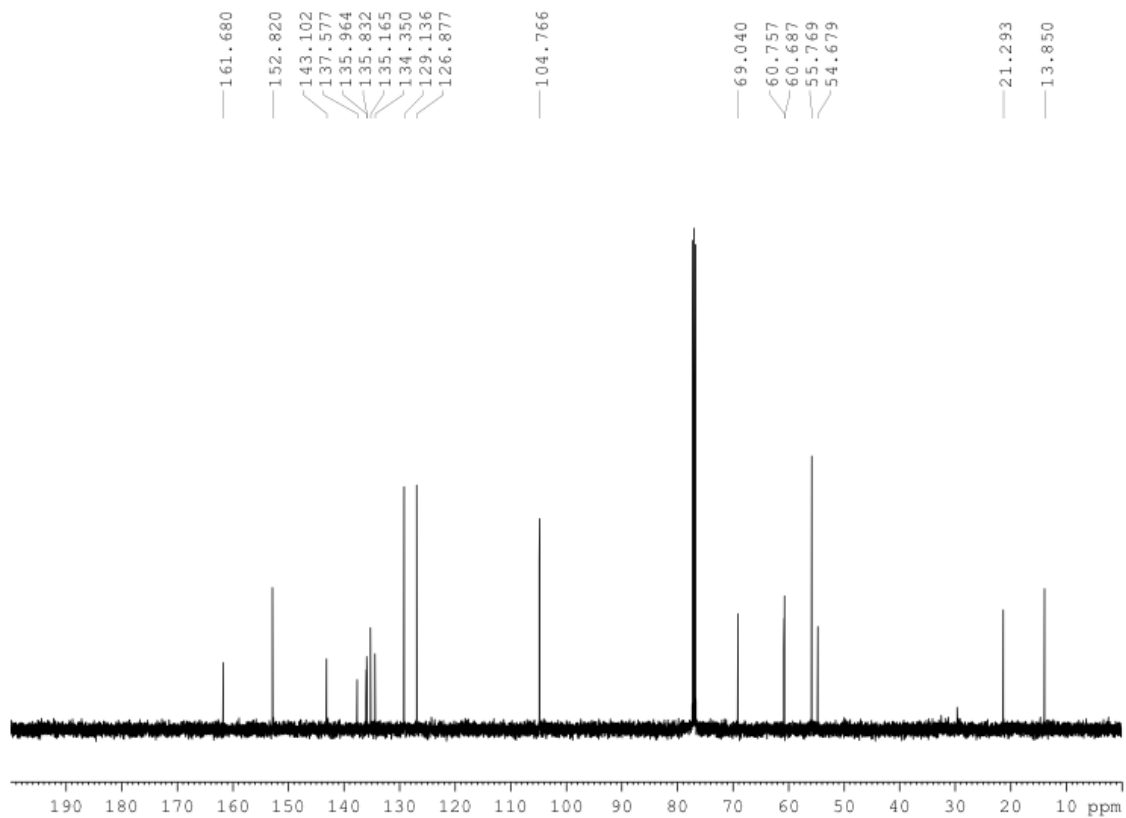

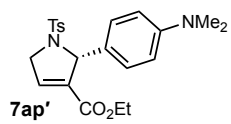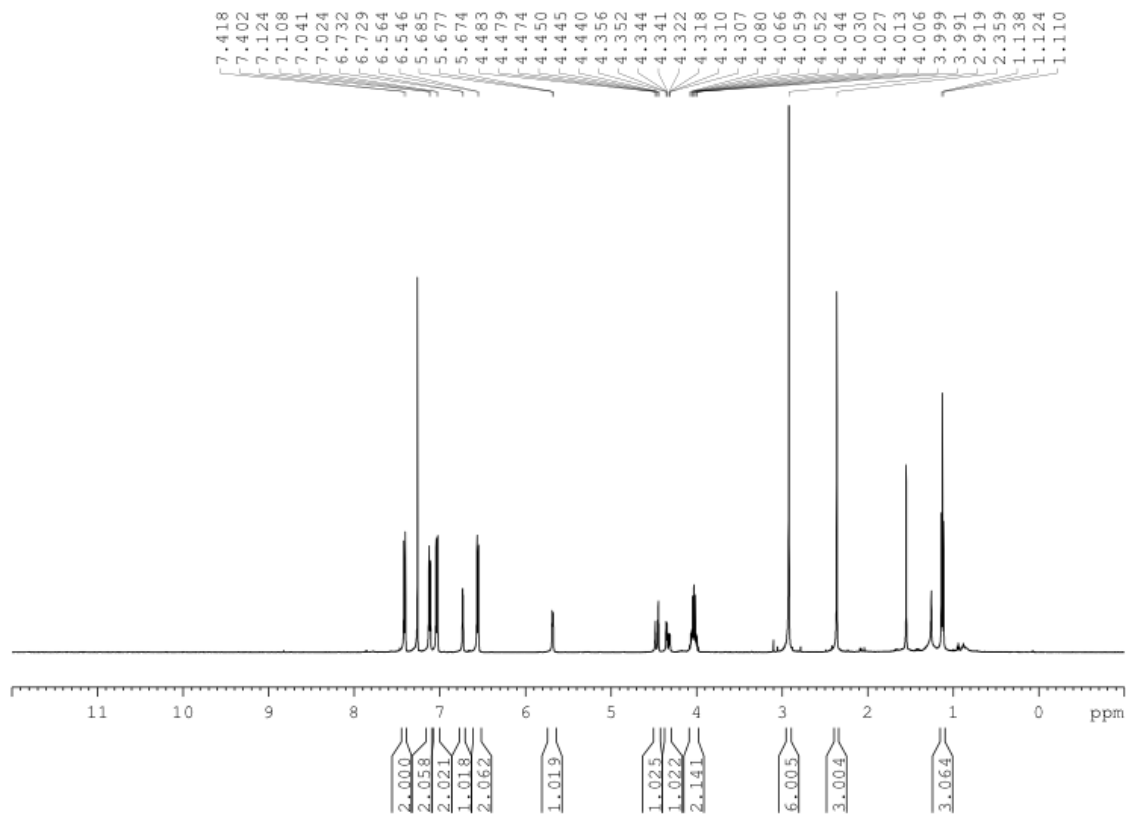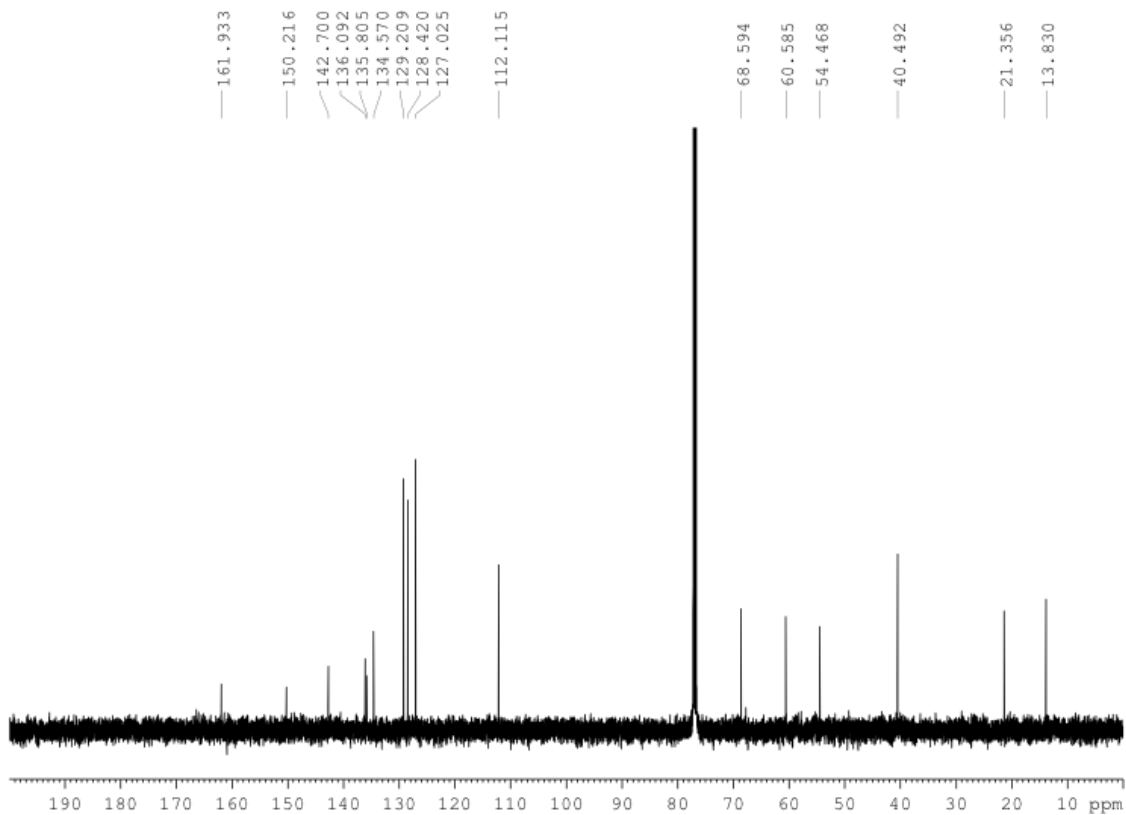

## 7. ORTEP Representations of the Phosphine Oxides 3b and 3c

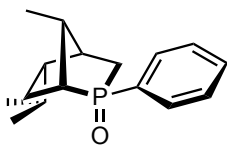

3b derived from (S)-carvone

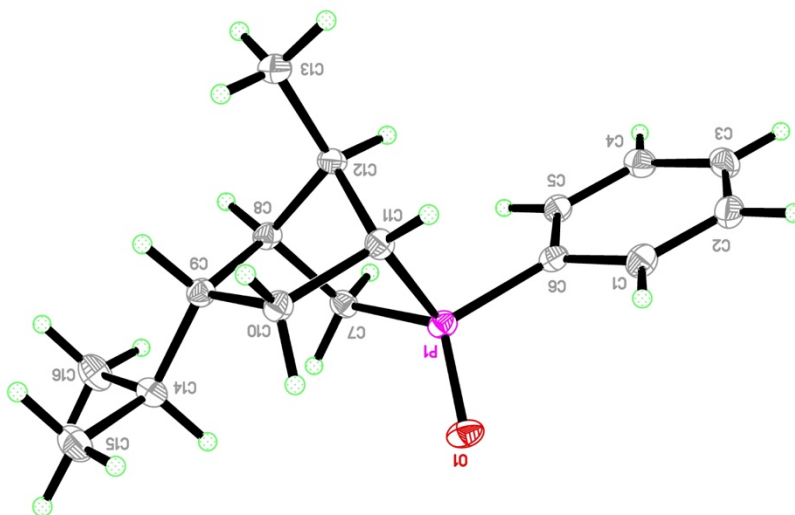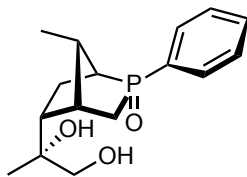

3c derived from (R)-carvone

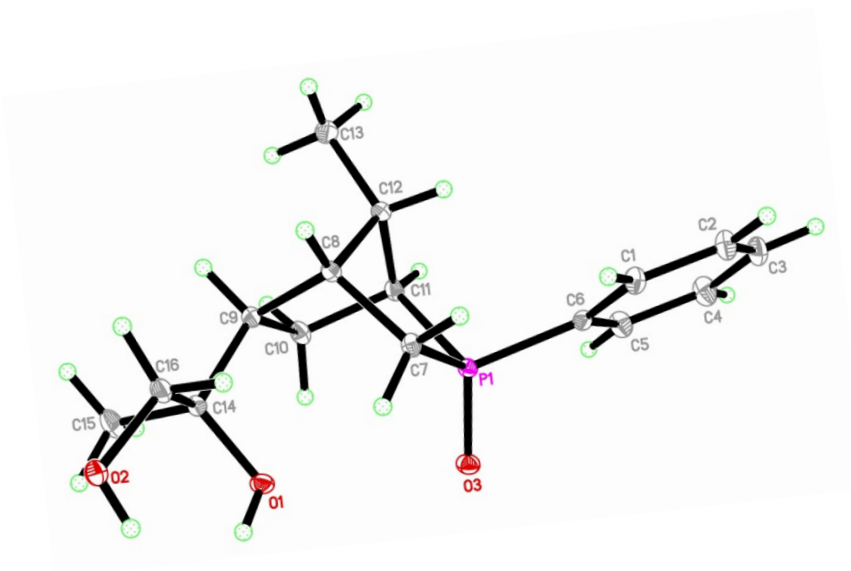

Supplement: NIHMS963101-supplement-Supplemental.pdf [file NIHMS963101-supplement-Supplemental.pdf]
